# Supplementary material for: In vivo investigation of the tissue response to commercial Teflon insulin infusion sets in large swine for 14 days: the effect of angle of insertion on tissue histology and insulin spread within the subcutaneous tissue
Source: PubMed Central journal article supplement — BMJ Open Diabetes Res Care. 2019 Dec 8;7(1):e000881. doi: 10.1136/bmjdrc-2019-000881 (PMC6904176; doi:10.1136/bmjdrc-2019-000881), 2019-12-08

## Supplementary Material II

Eisler *et al.*

Included in this electronic supplementary material B (ESM B) are the histology, micro-CT and pressure data of each individual CSII catheter. Please note that the y-Axes have different scales in each example to better show the pressure profile.

# 90° Straight Teflon IISs

# 90°, Swine S01, 14 days

Note:

kinked cannula

At this point, micro-CT and pressure measurement methods had not yet been finalized.

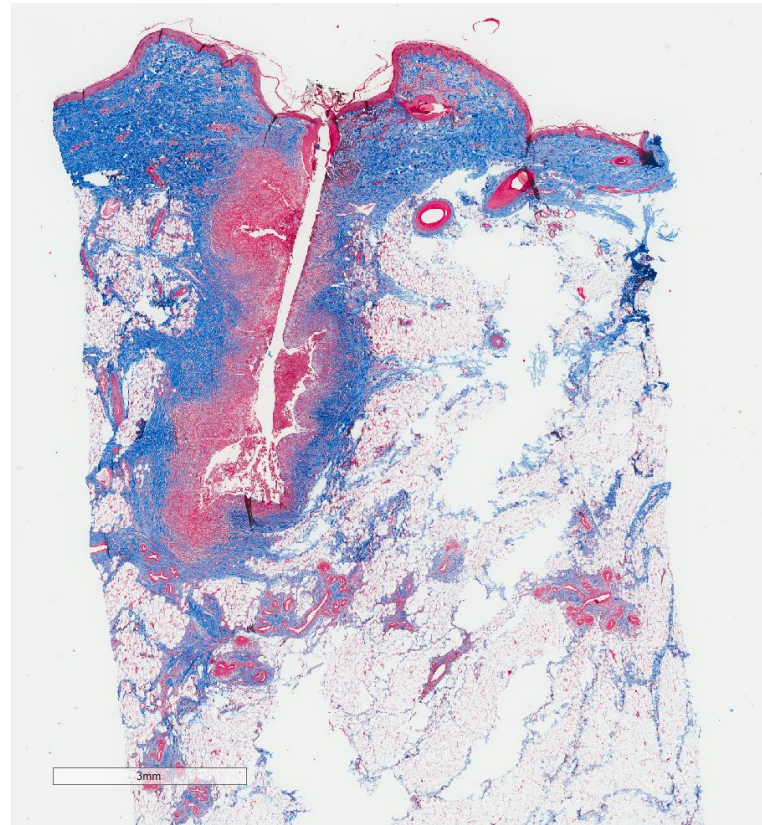

# 90°, Swine S01, 12 Days

Note:

At this point, micro-CT and pressure measurement methods had not yet been finalized.

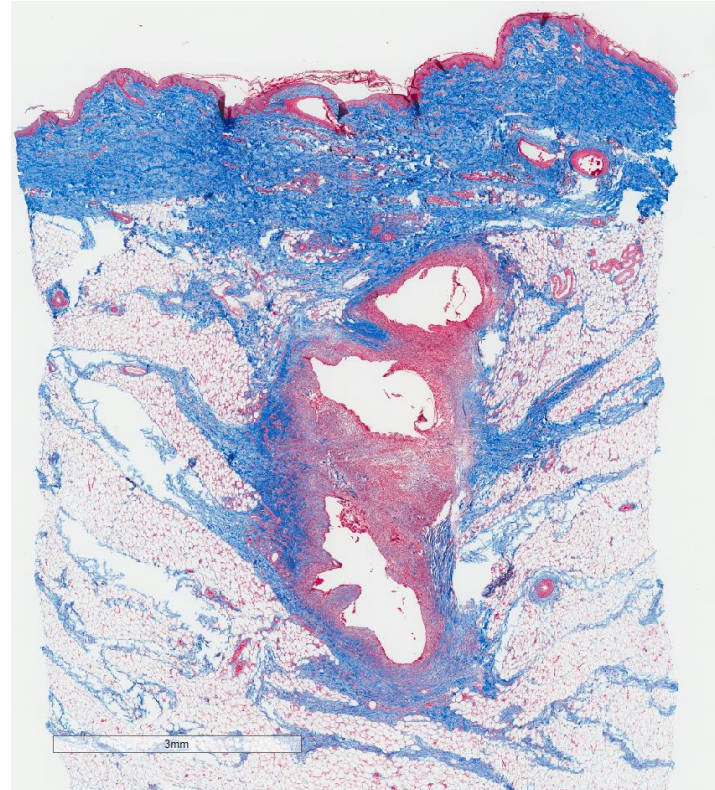

# 90°, Swine S01, 10 Days

Note:

kinked cannula

At this point, micro-CT and pressure measurement methods had not yet been finalized.

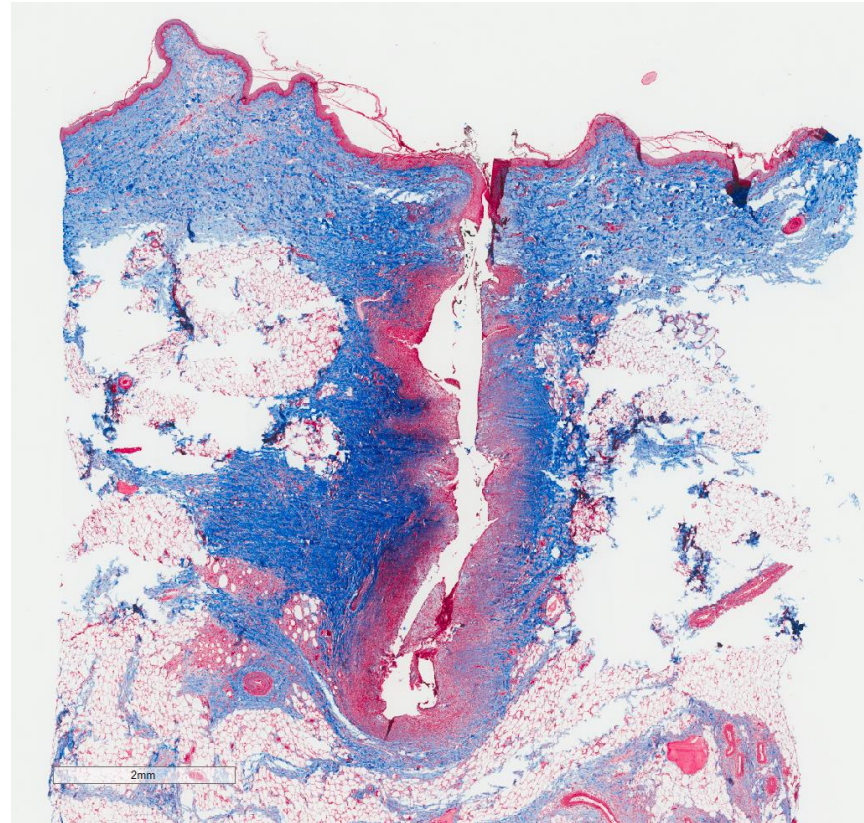

# 90°, Swine S01, 8 Days

Note:

At this point, micro-CT and pressure measurement methods had not yet been finalized.

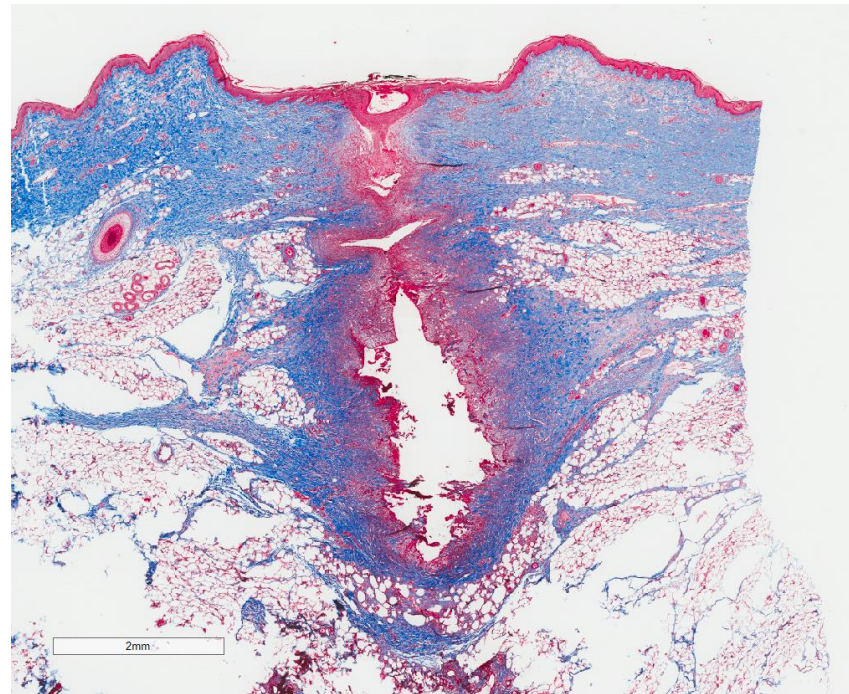

# 90°, Swine S01, 6 Days

Note:

kinked cannula

At this point, micro-CT and pressure measurement methods had not yet been finalized.

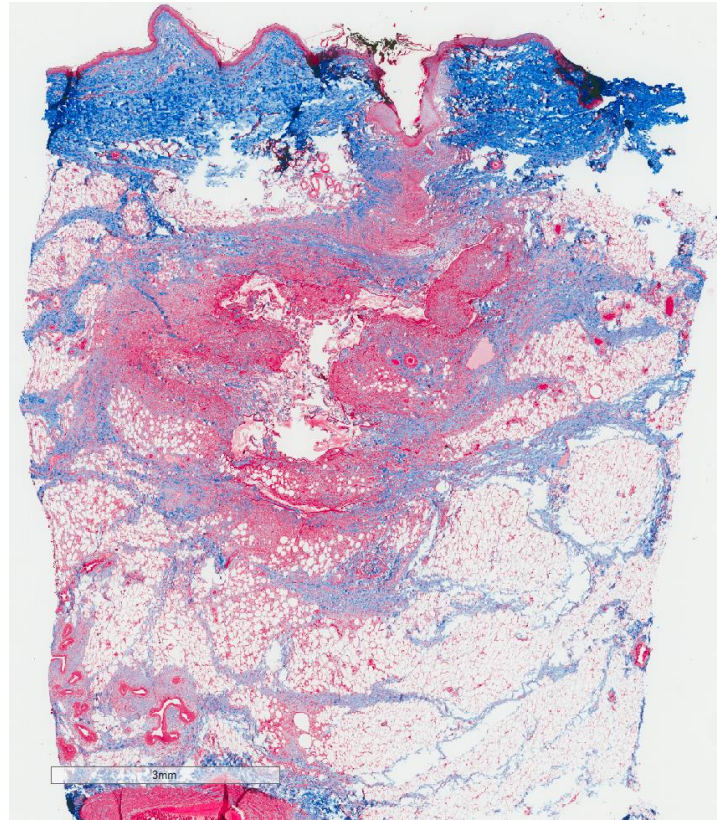

# 90°, Swine S01, 4 Days

*Note:*

kinked cannula

pump occlusion alarm

At this point, micro-CT and pressure measurement methods had not yet been finalized.

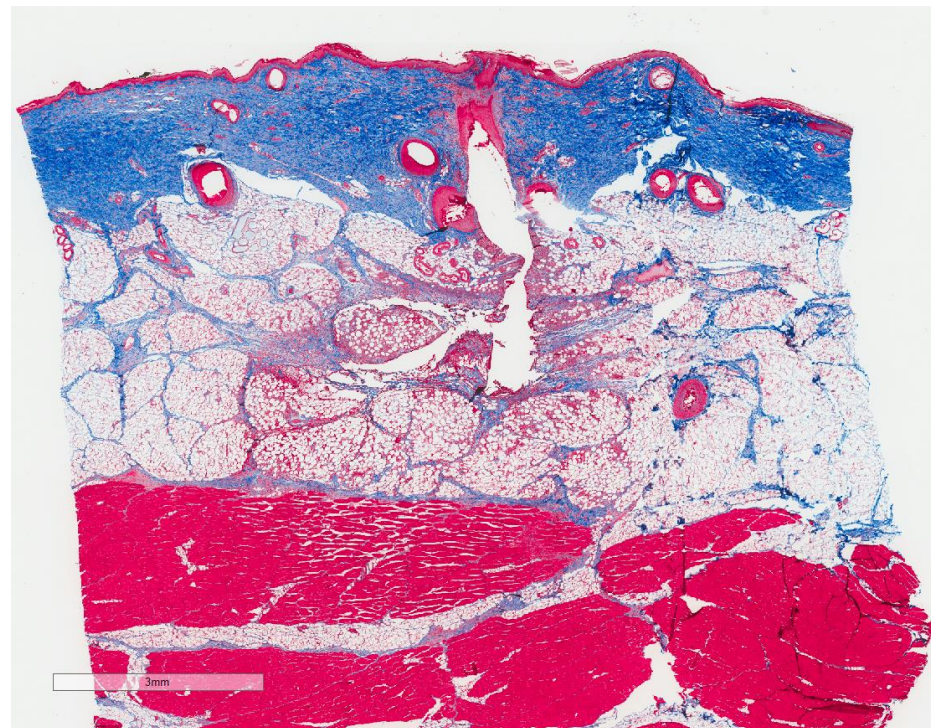



# 90°, Swine S01, 2 Days

Note:

kinked cannula

At this point, micro-CT and pressure measurement methods had not yet been finalized.

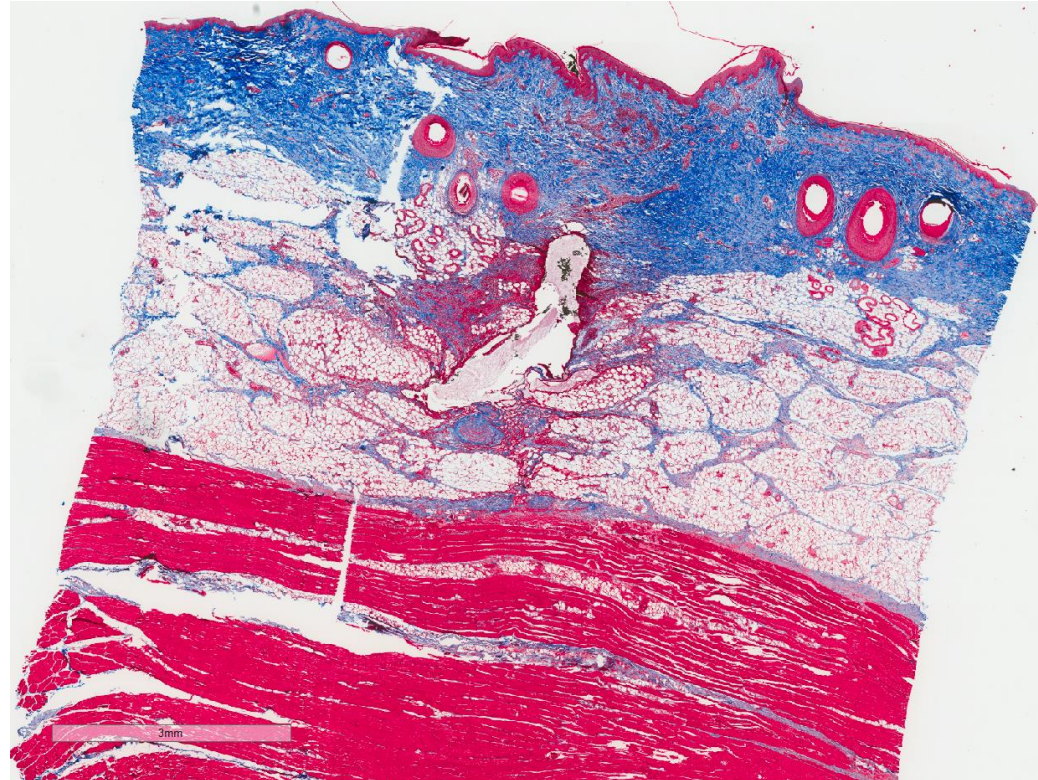

# 90°, Swine S01, Freshly Inserted (Day 1)

*Note:*

At this point, micro-CT and pressure measurement methods had not yet been finalized.

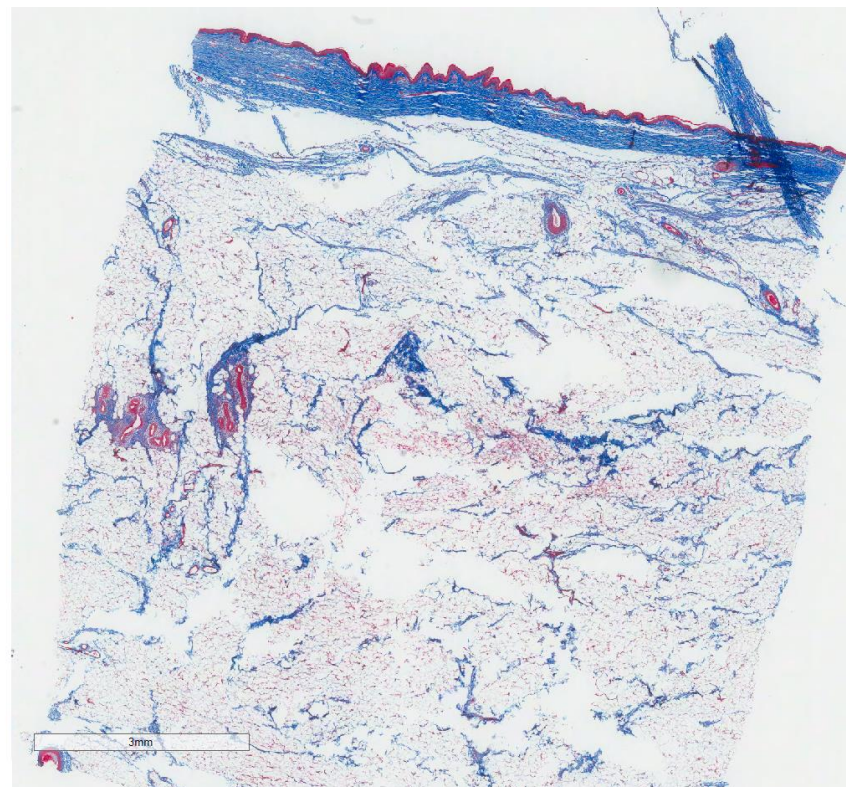

# 90°, Swine S02, 14 Days

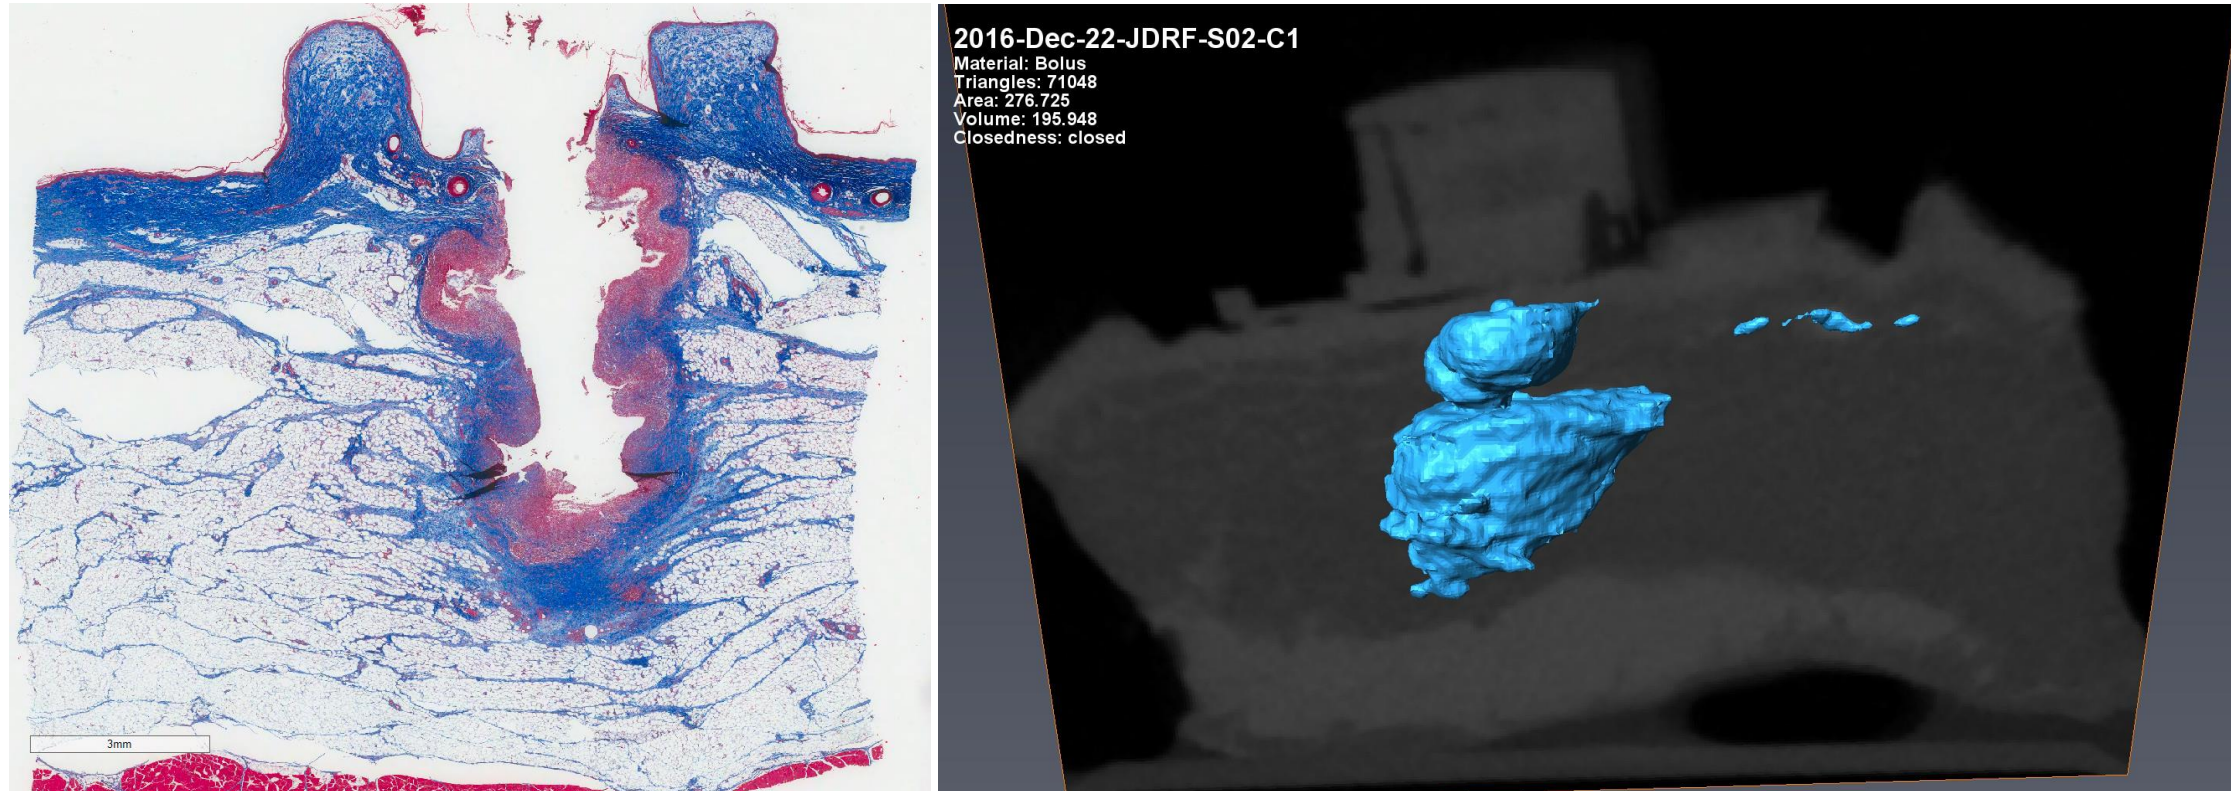

Note: kinked cannula

At this point, pressure measurement methods had not yet been finalized.

# 90°, Swine S02, 12 Days

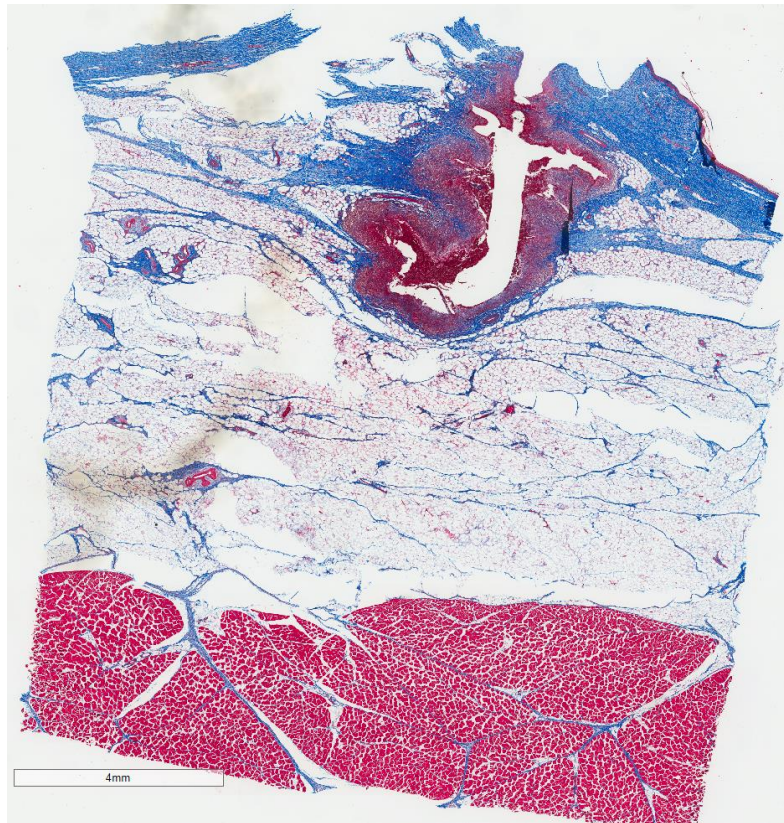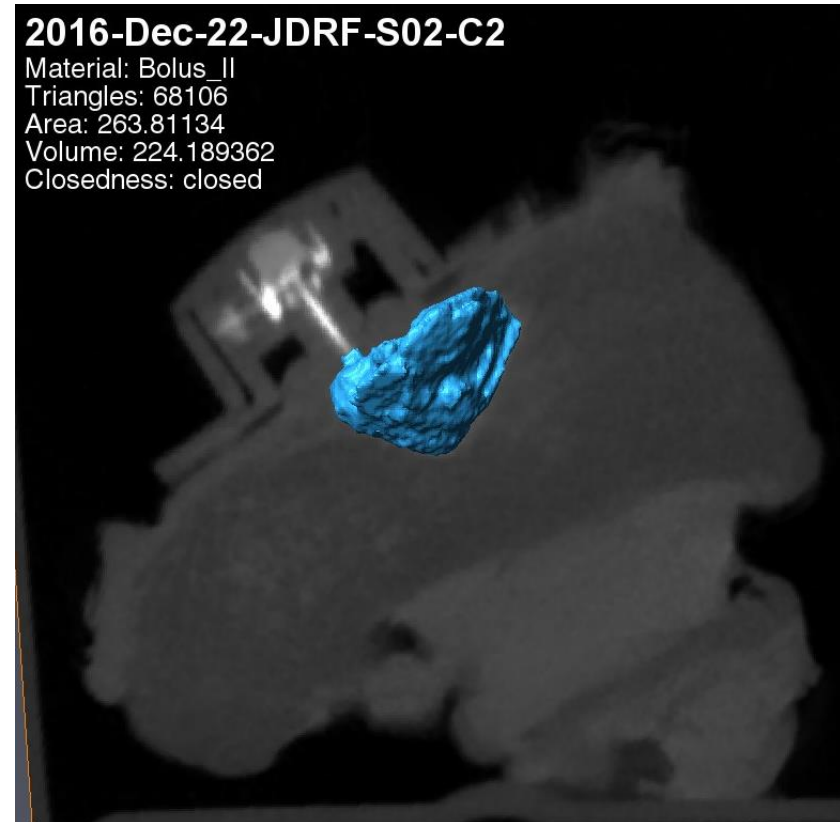

*Note:* kinked cannula

At this point, pressure measurement methods had not yet been finalized.

# 90°, Swine S02, 10 Days

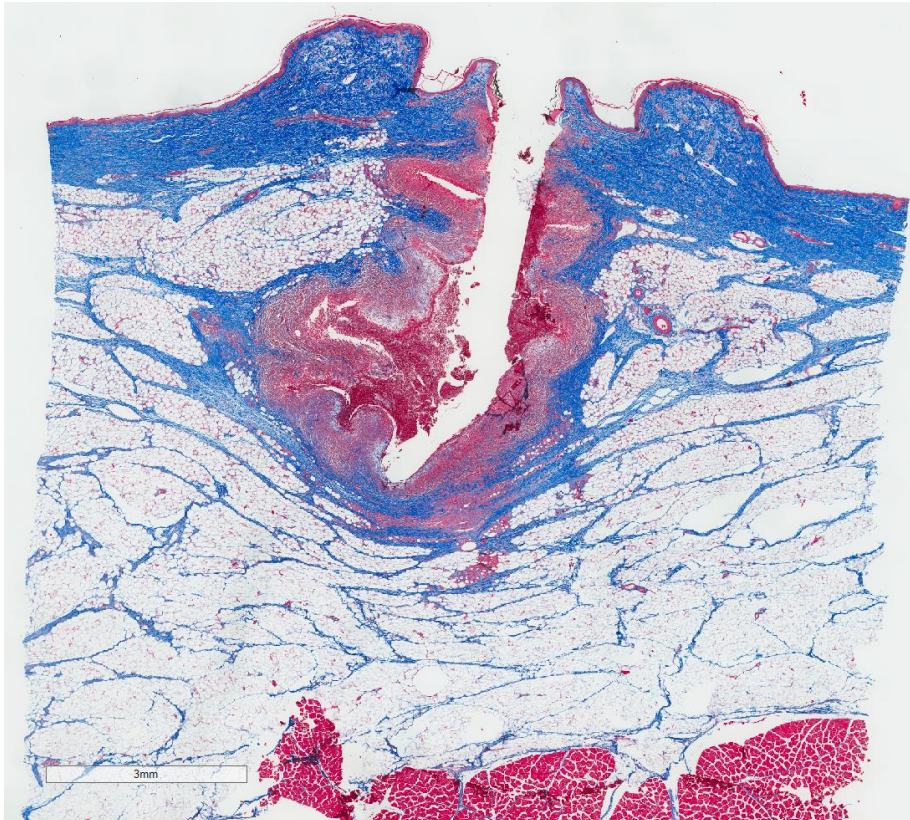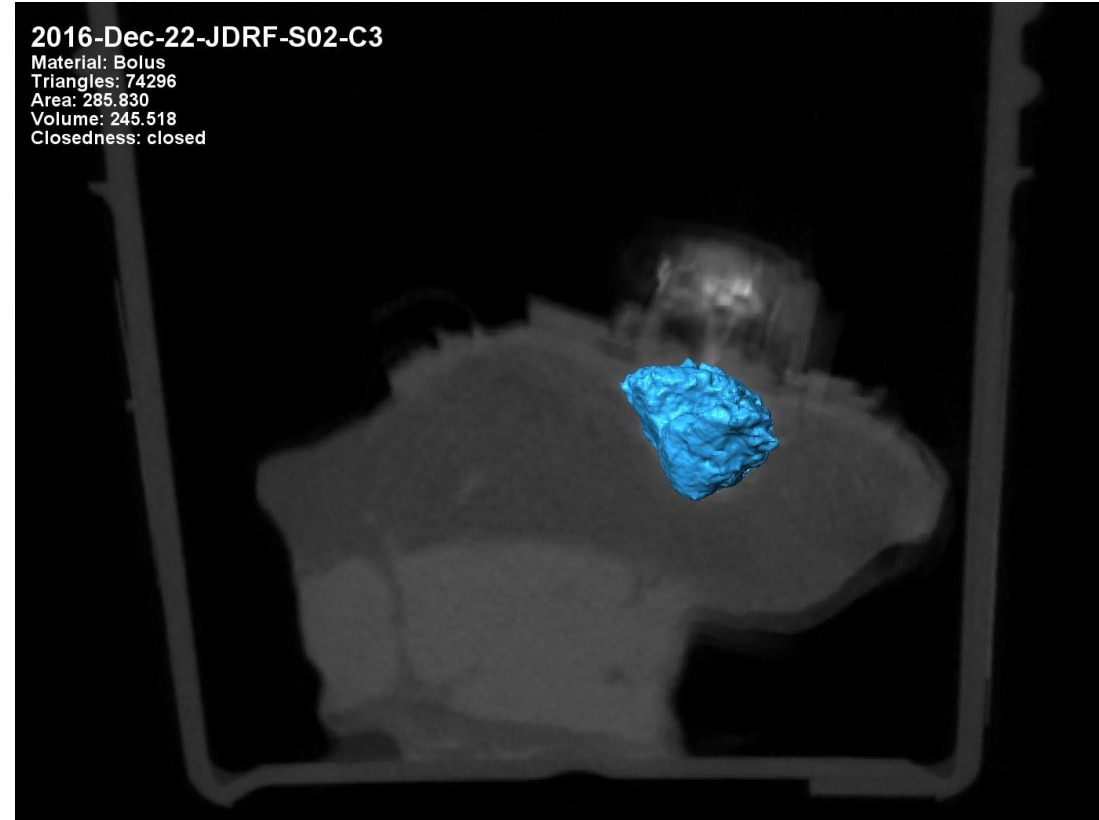

Note: At this point, pressure measurement methods had not yet been finalized.

# 90°, Swine S02, 8 Days

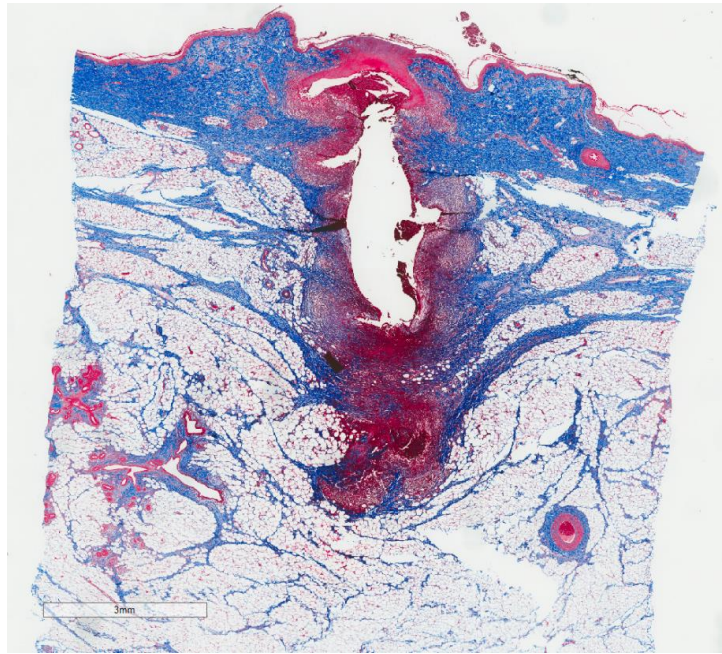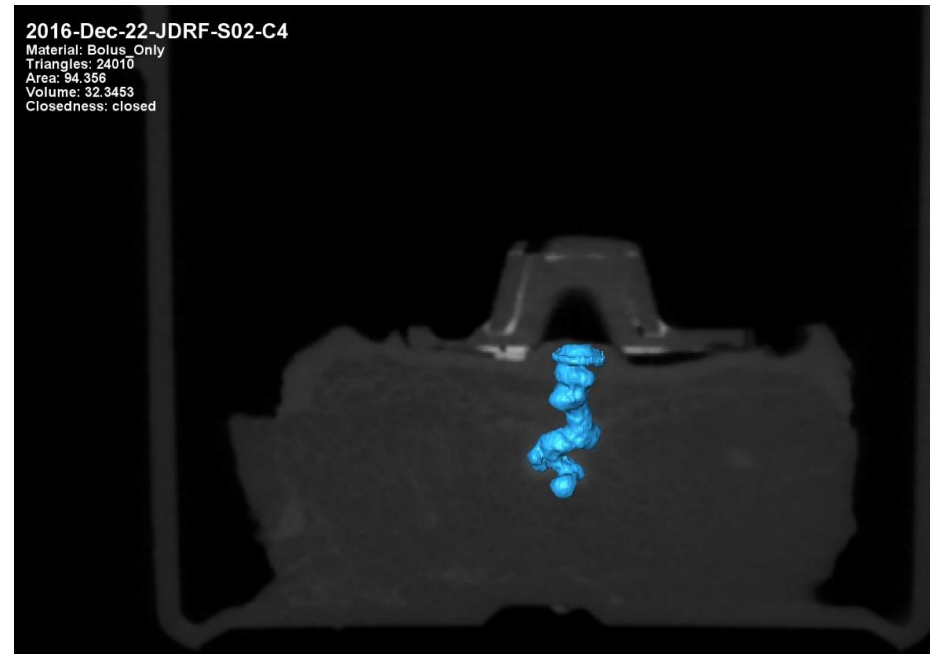

Note: kinked cannula  
leak  
<70  $\mu\text{L}$  in tissue (32.3  $\mu\text{L}$ )

At this point, pressure measurement methods had not yet been finalized.

# 90°, Swine S02, 6 Days

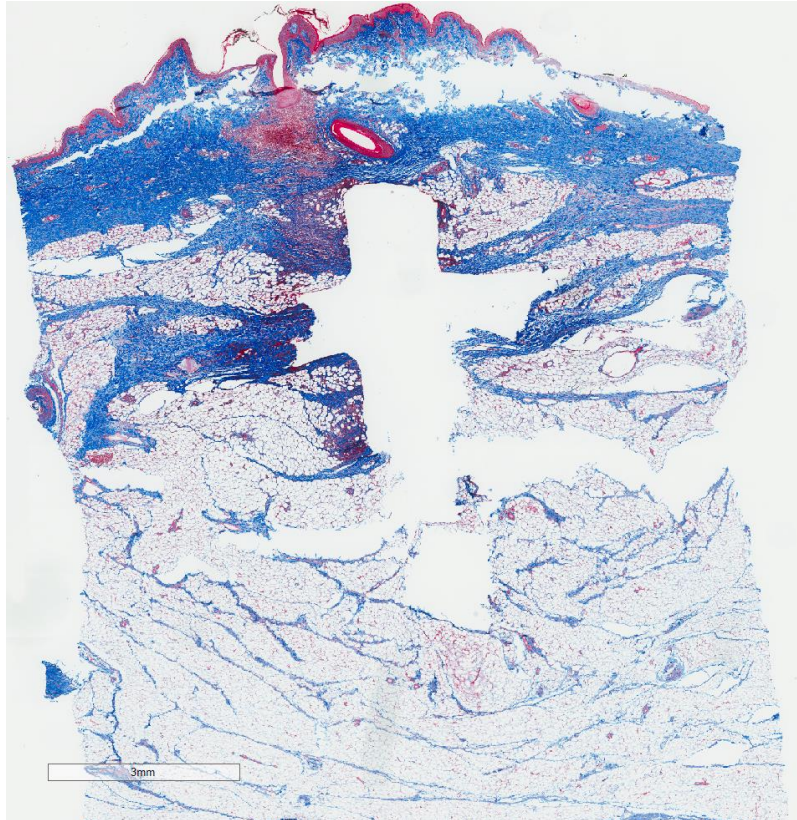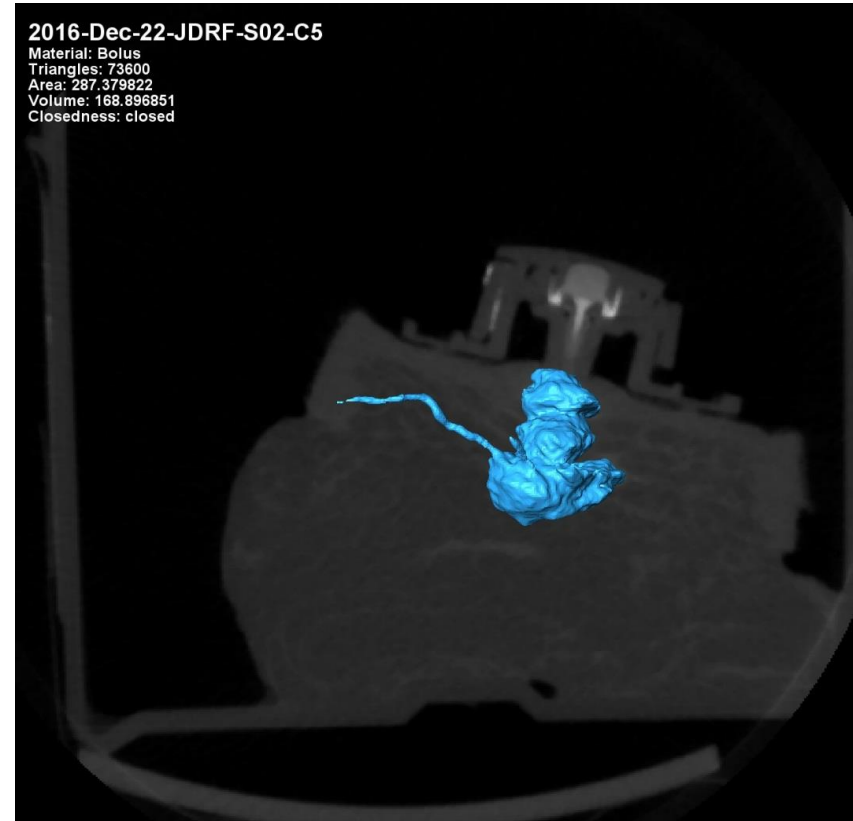

*Note:* At this point, pressure measurement methods had not yet been finalized.

# 90°, Swine S02, 4 Days

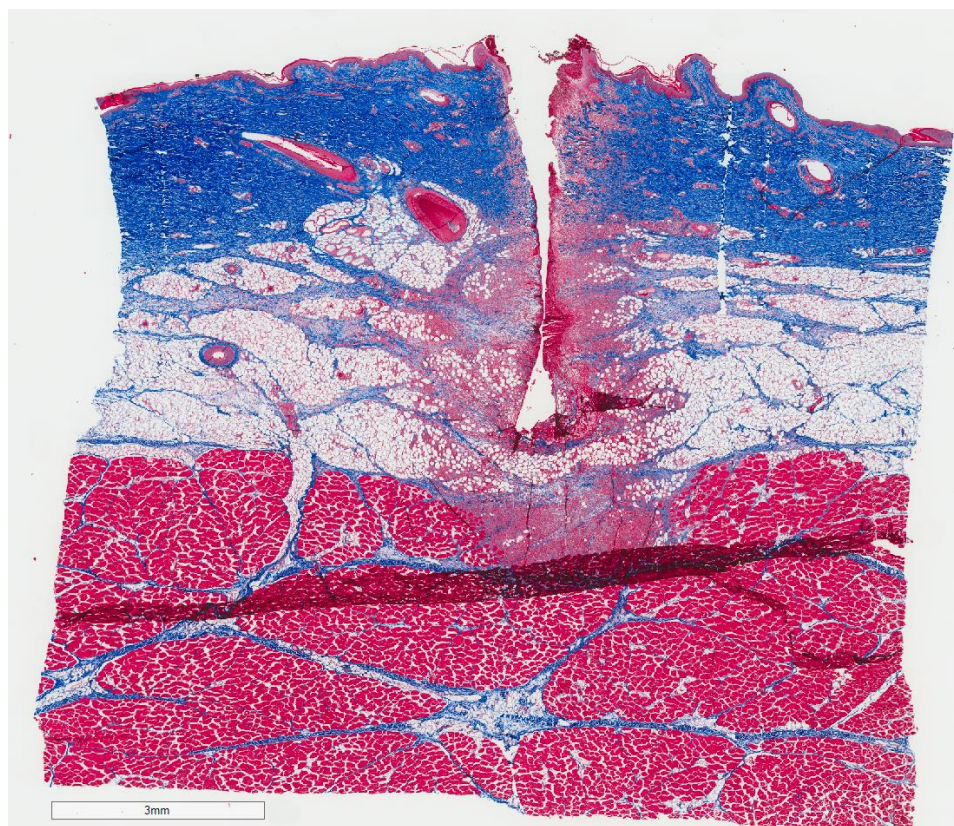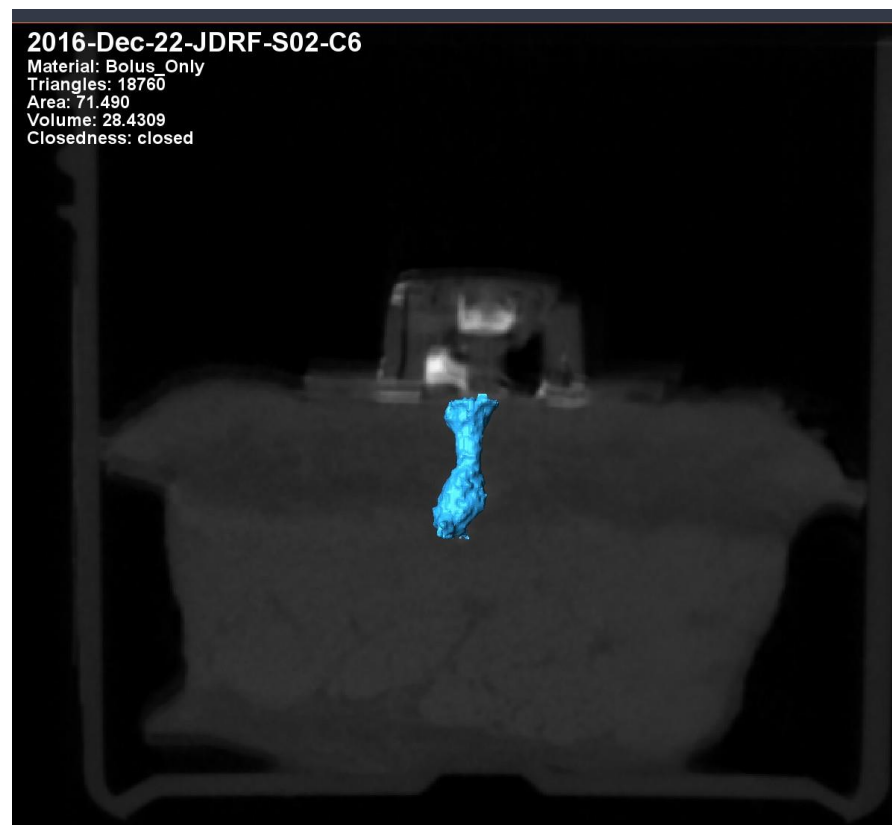

Note: leak

<70  $\mu$ L in tissue (28.4  $\mu$ L)

At this point, pressure measurement methods had not yet been finalized.



# 90°, Swine S02, 2 Days

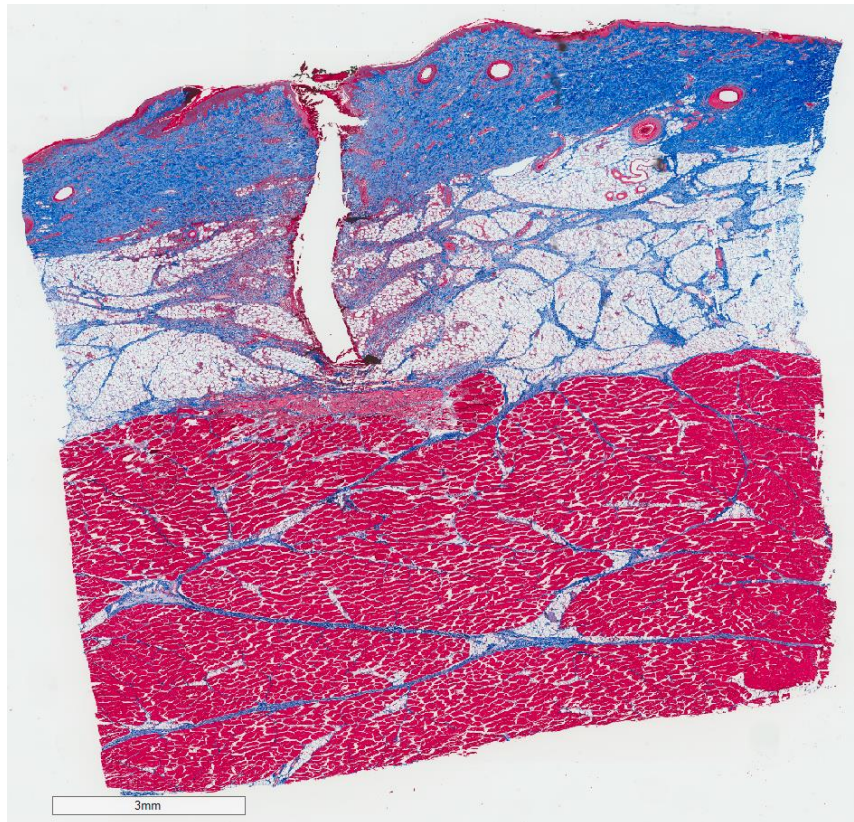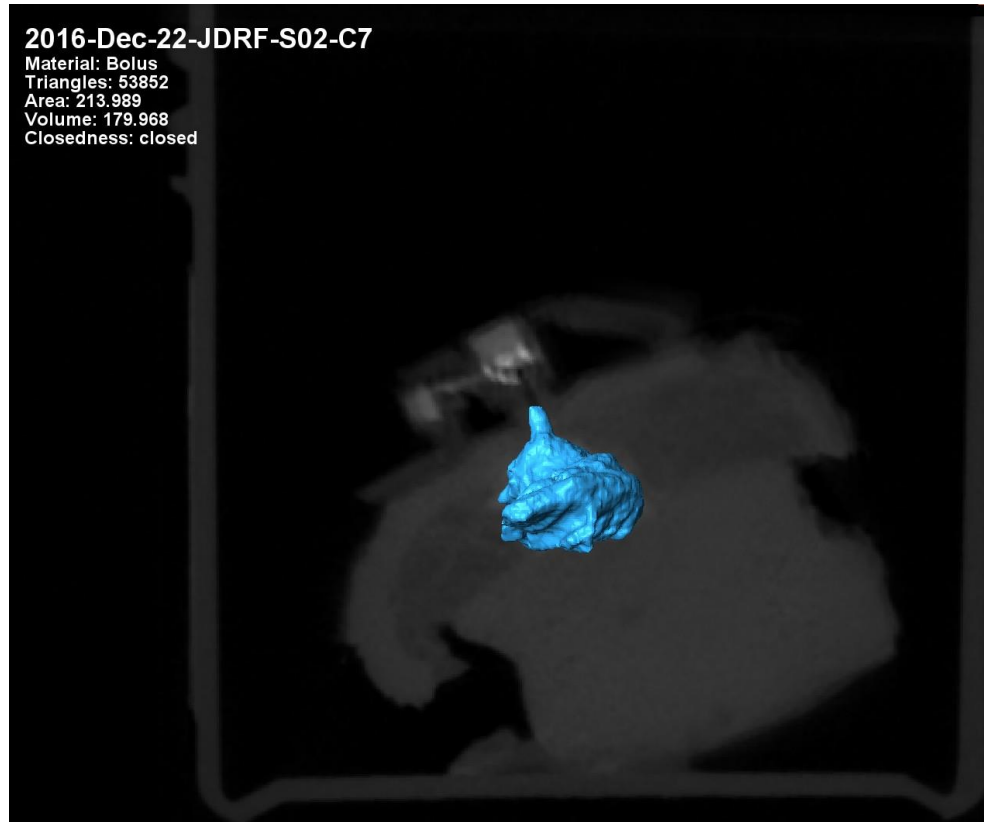

Note: At this point, pressure measurement methods had not yet been finalized.

# 90°, Swine S02, Freshly Inserted (Day 1)

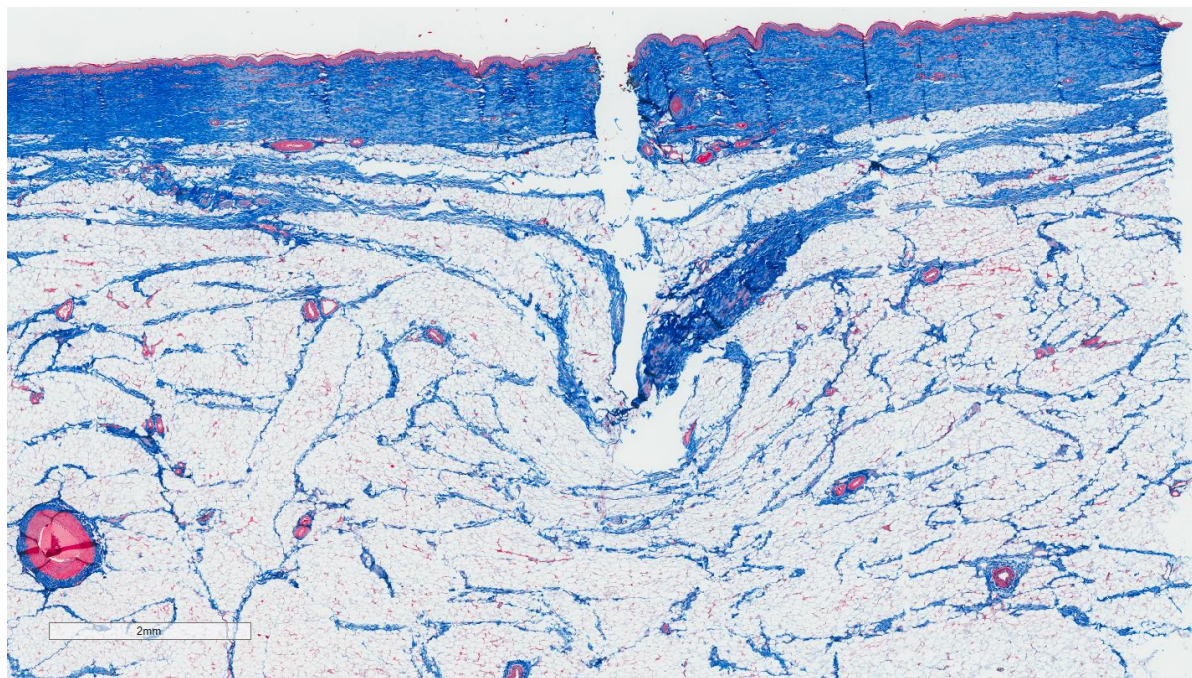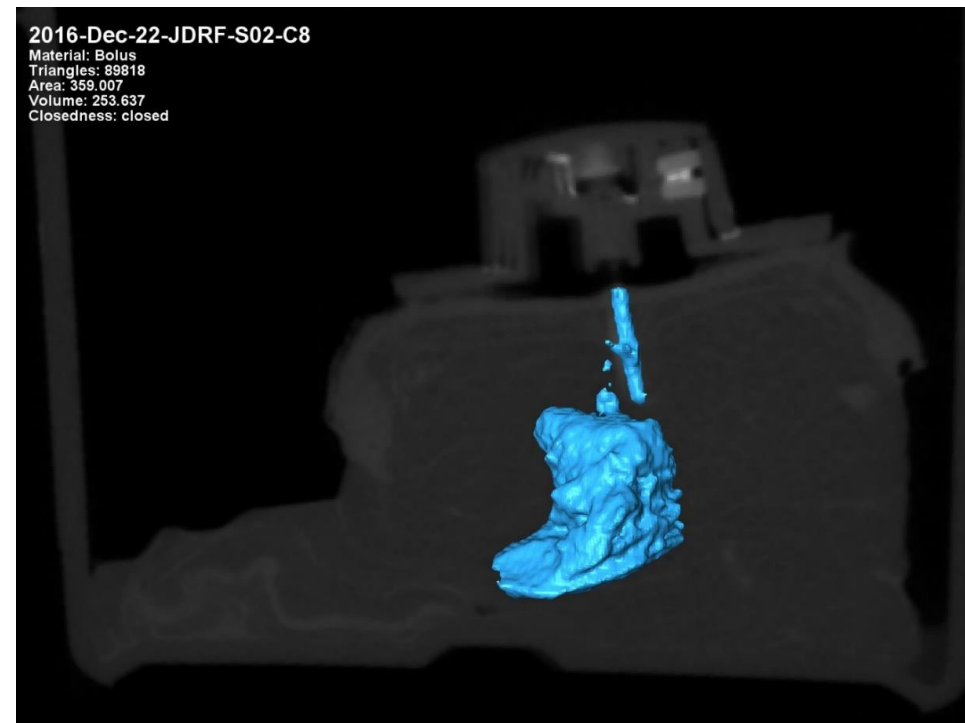

*Note:* At this point, pressure measurement methods had not yet been finalized.

# 90°, Swine S05, 14 Days

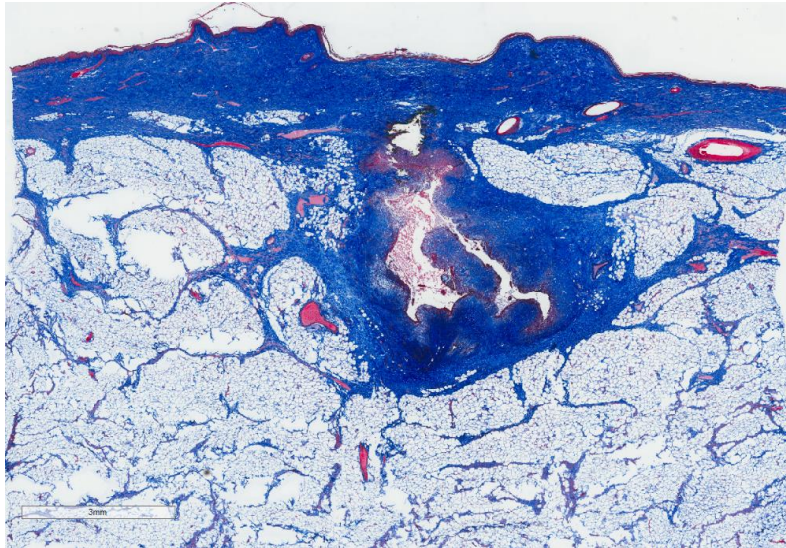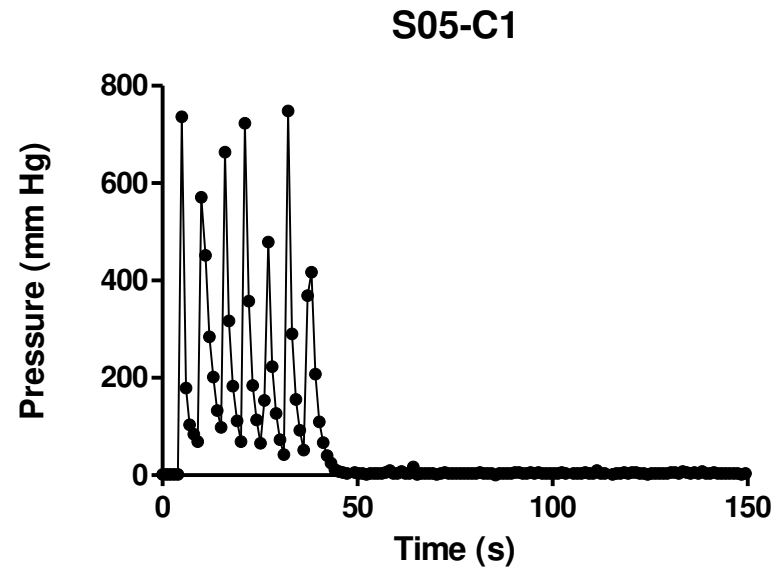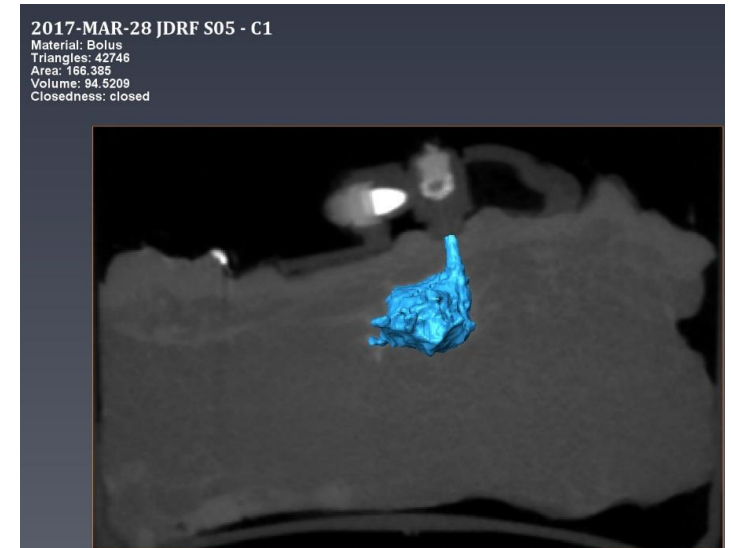

# 90°, Swine S05, 12 Days

Note: kinked cannula

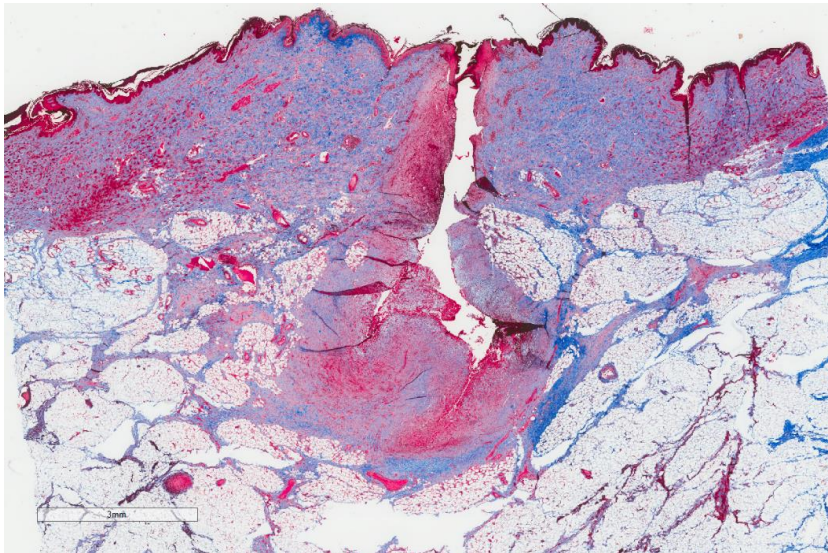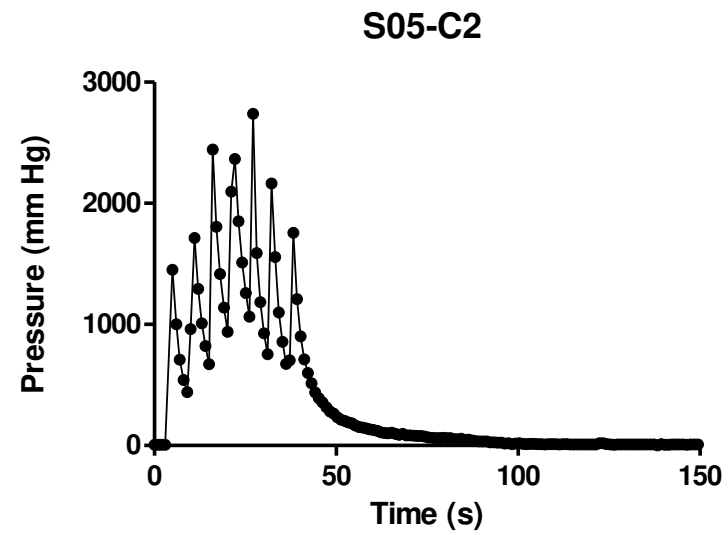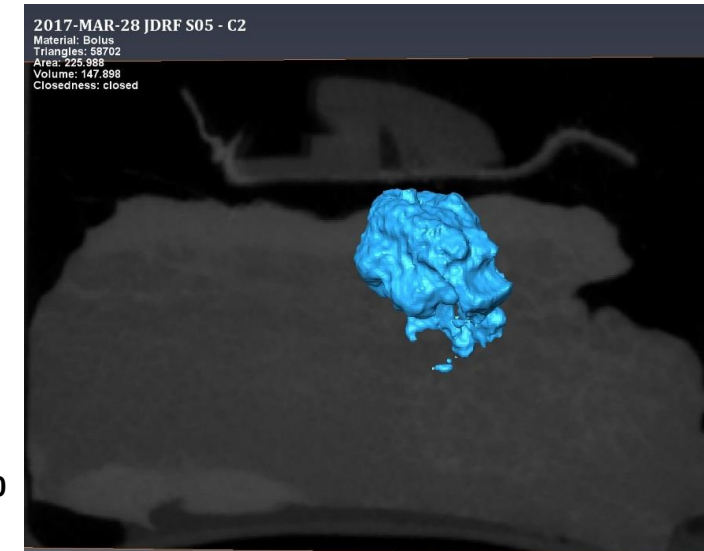

# 90°, Swine S05, 10 Days

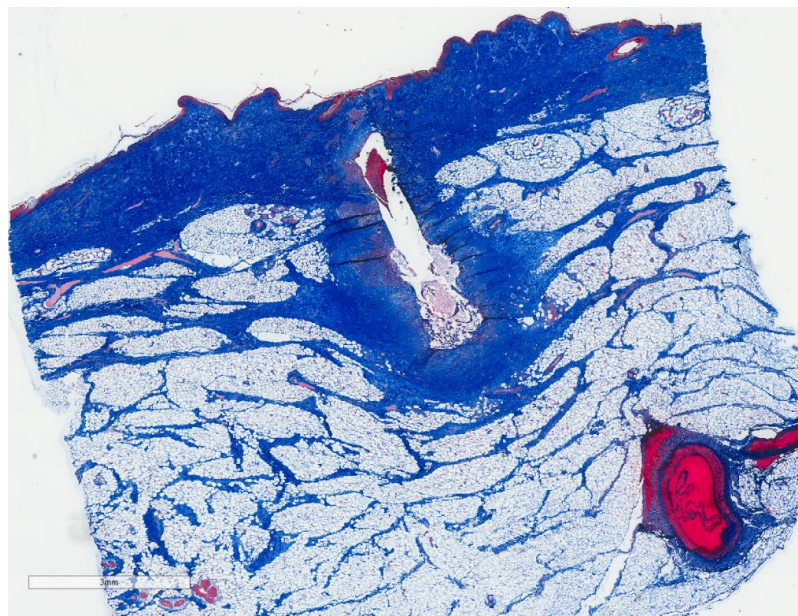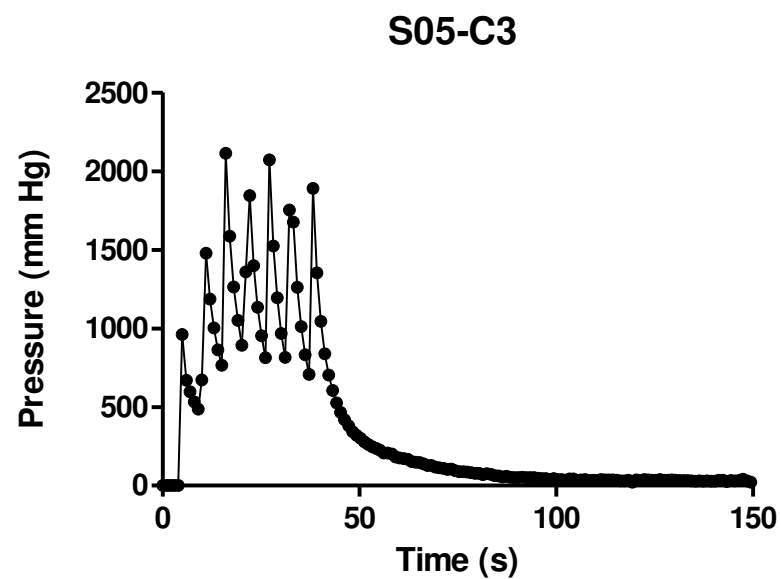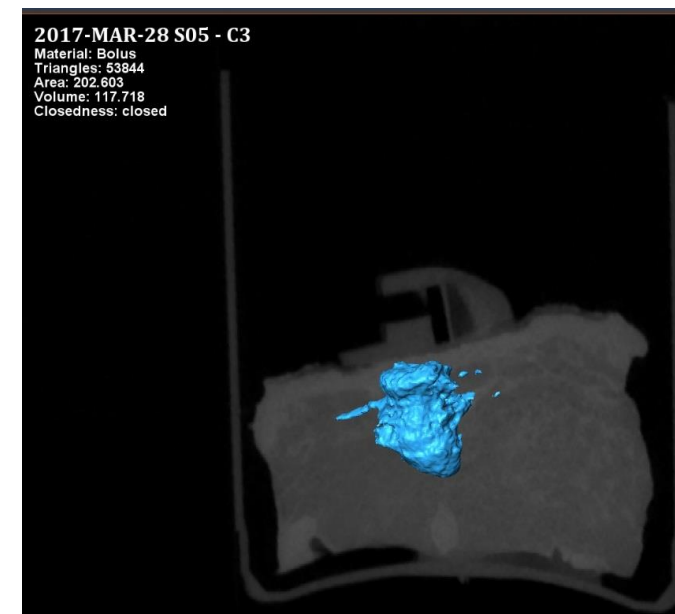

# 90°, Swine S05, 8 Days

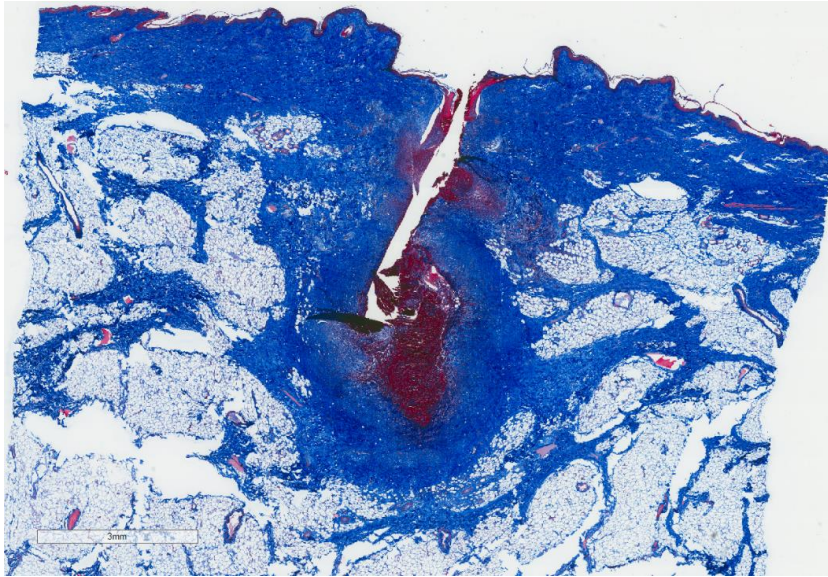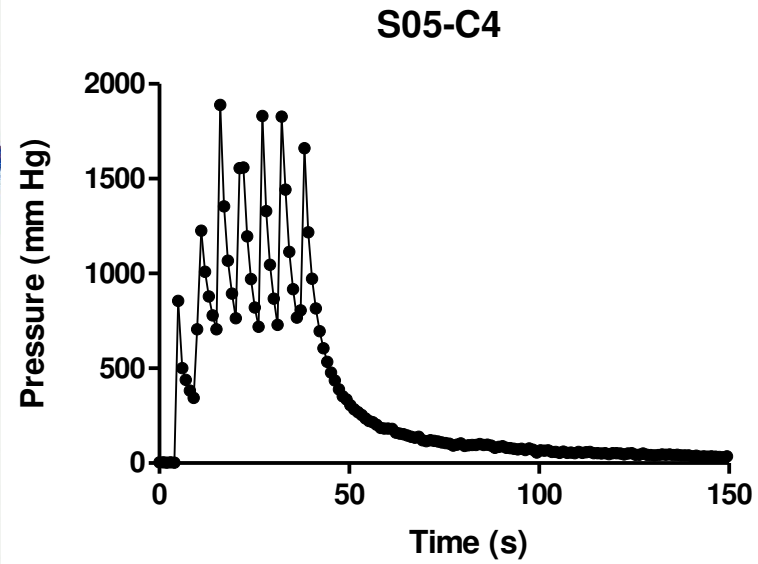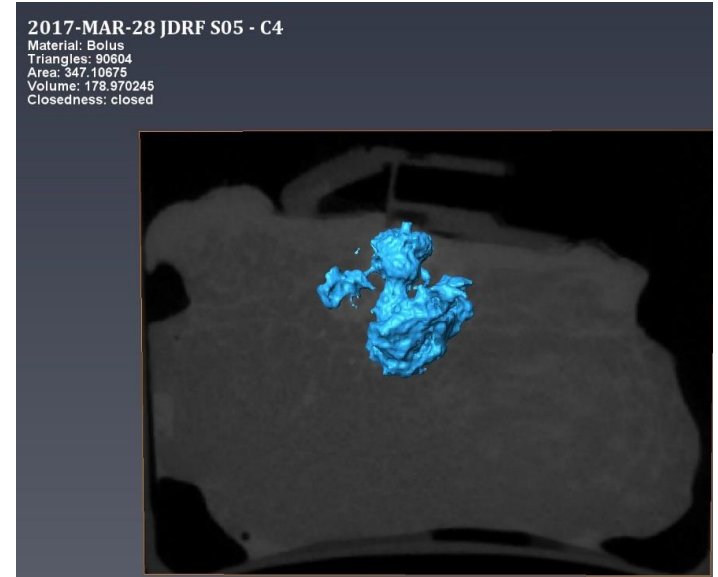

# 90°, Swine S05, 6 Days

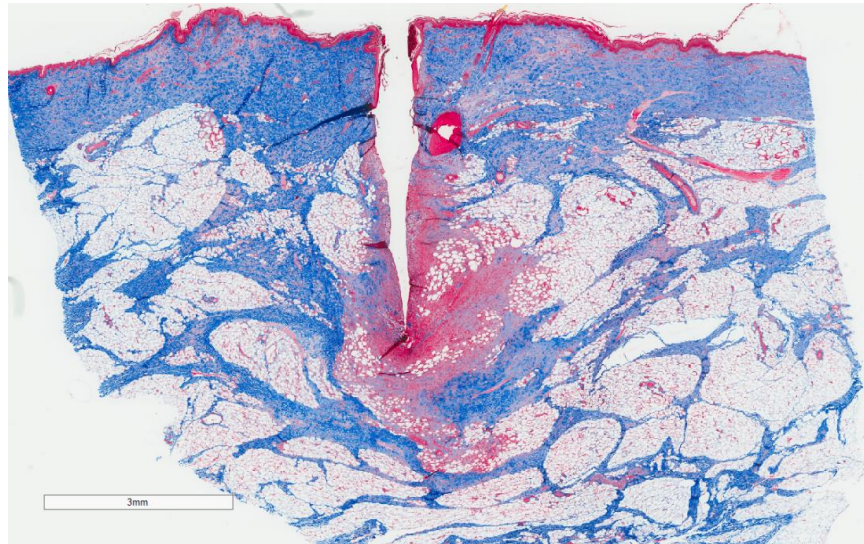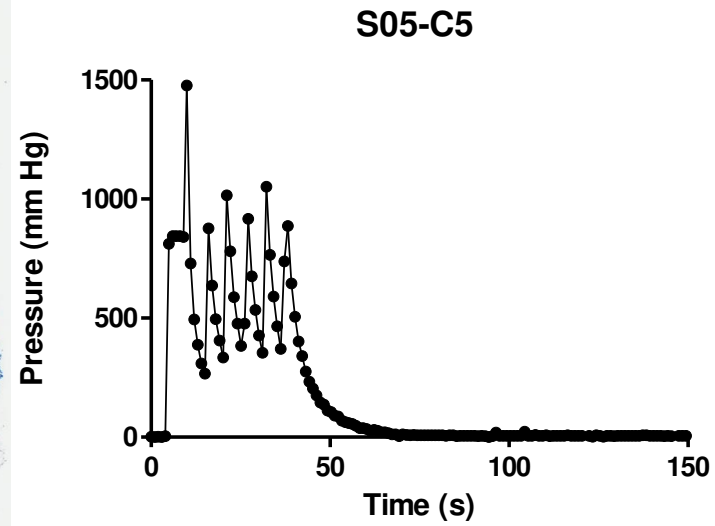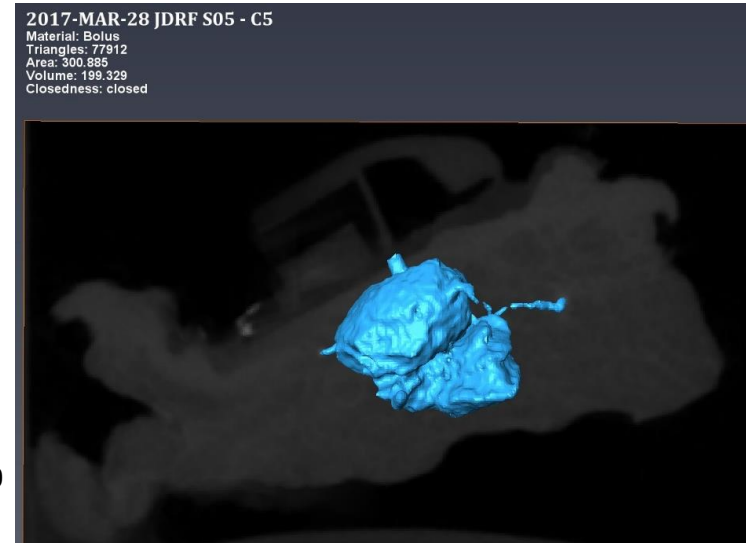

# 90°, Swine S05, 4 Days

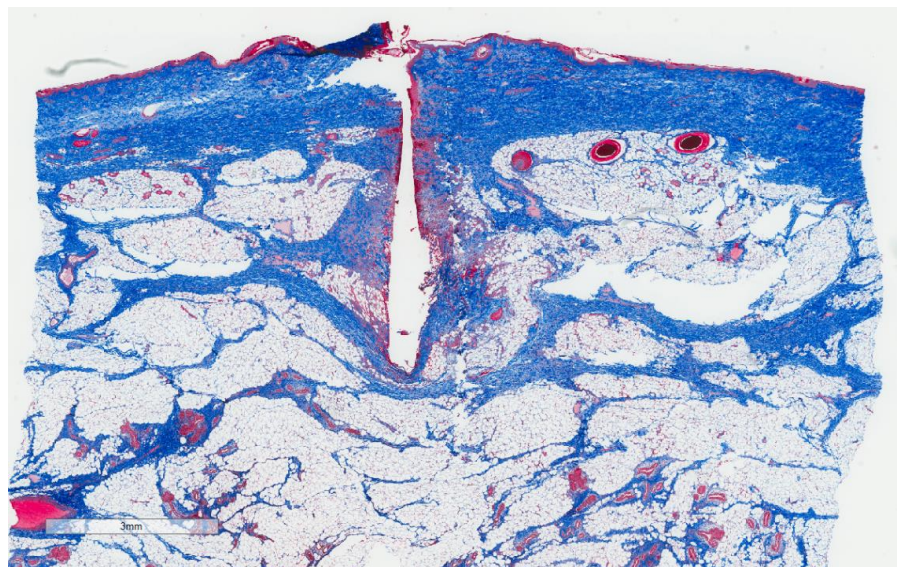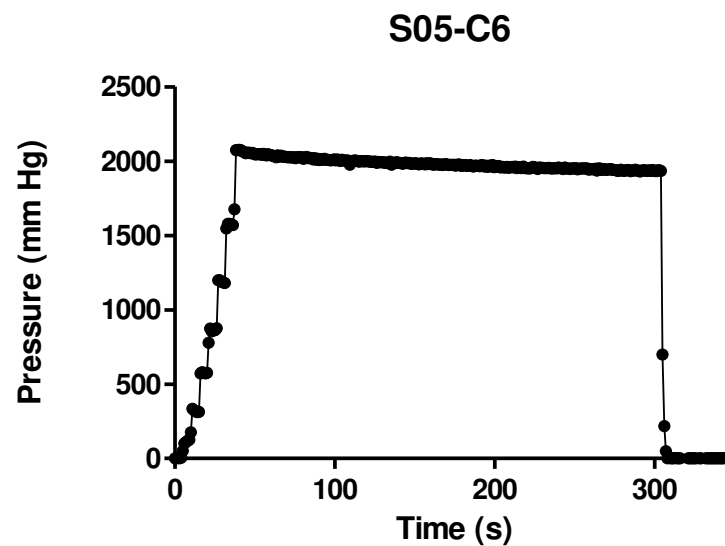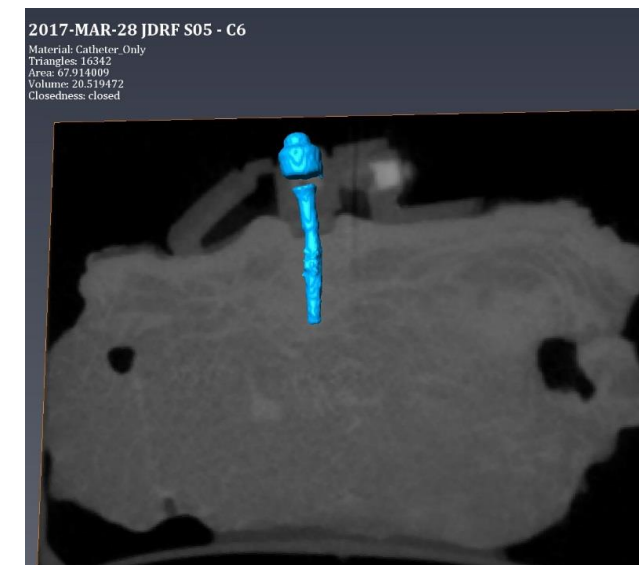

Note: no contrast in SC tissue



# 90°, Swine S05, 2 Days

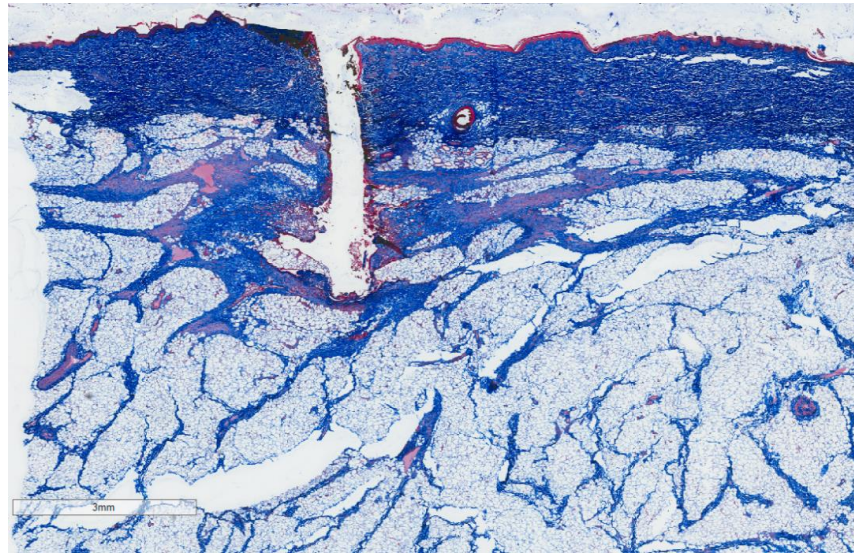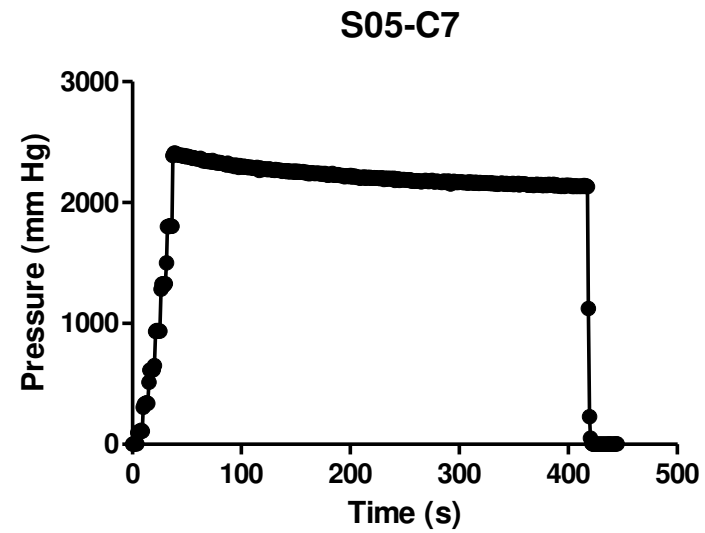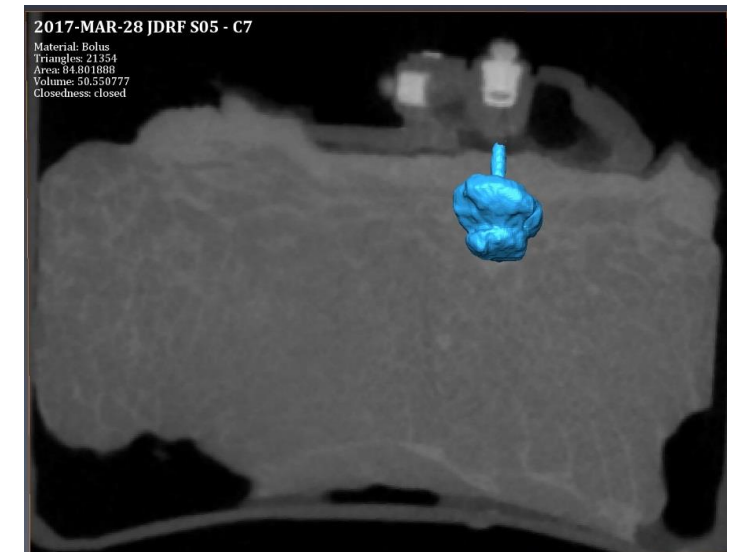

*Note:* <70  $\mu$ L in tissue (50.6  $\mu$ L)

# 90°, Swine S05, Freshly Inserted (Day 1)

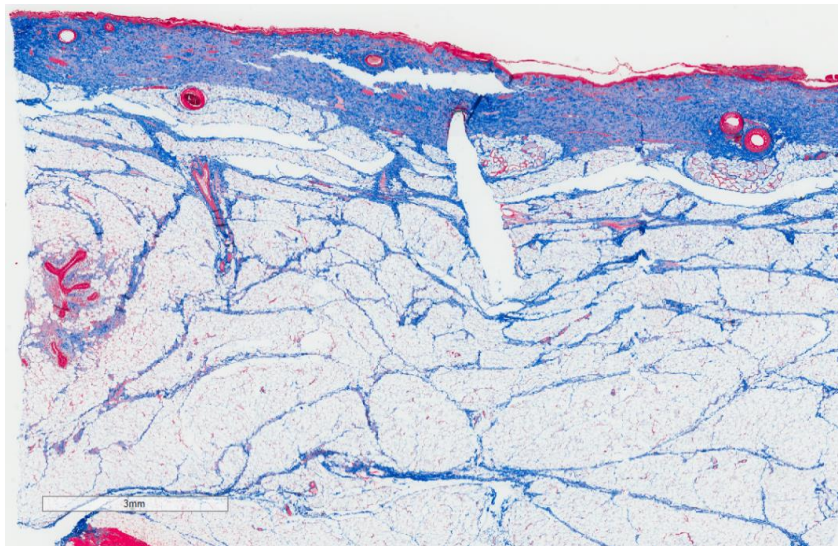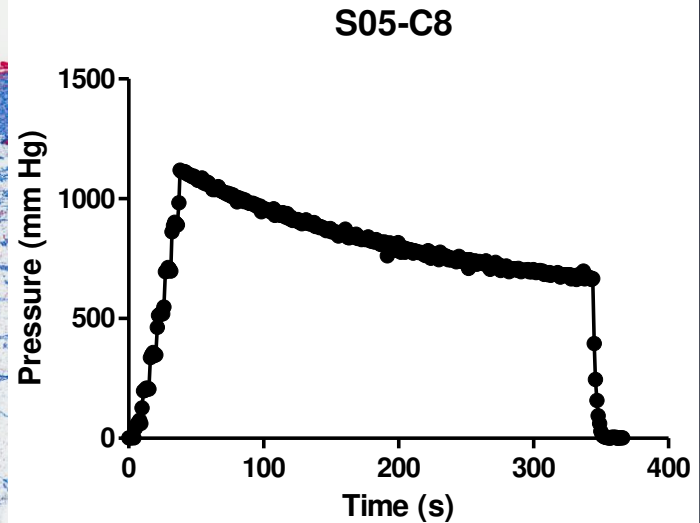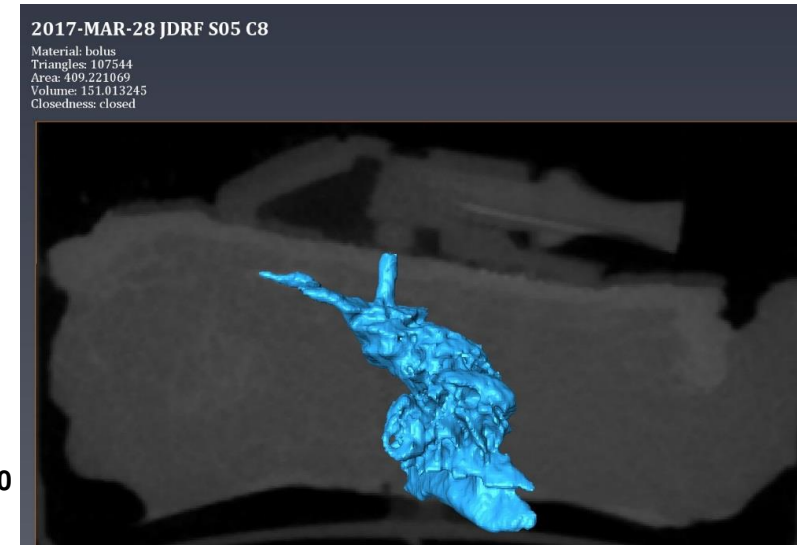

90°, Swine S06, 14 Days

*Removed, no data*

# 90°, Swine S06, 12 Days

Note: kinked cannula

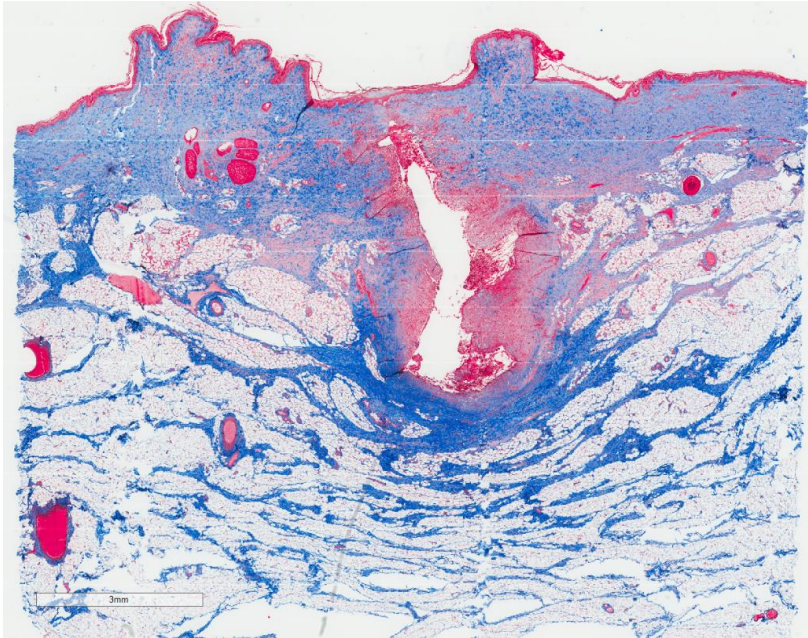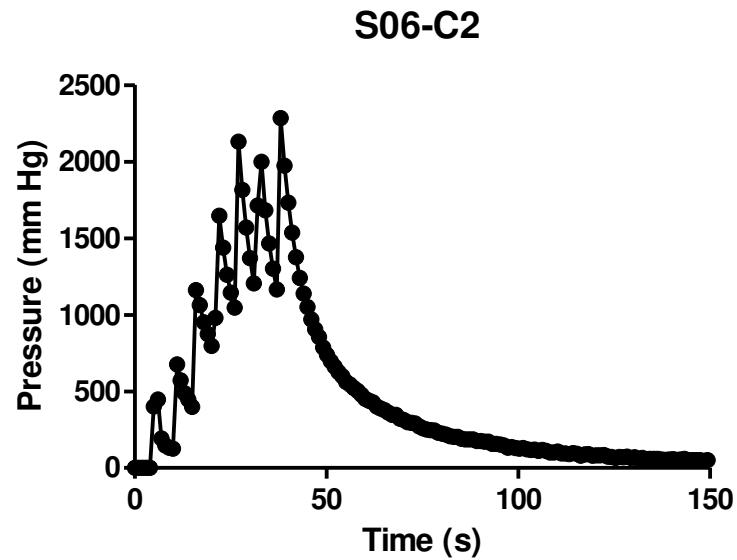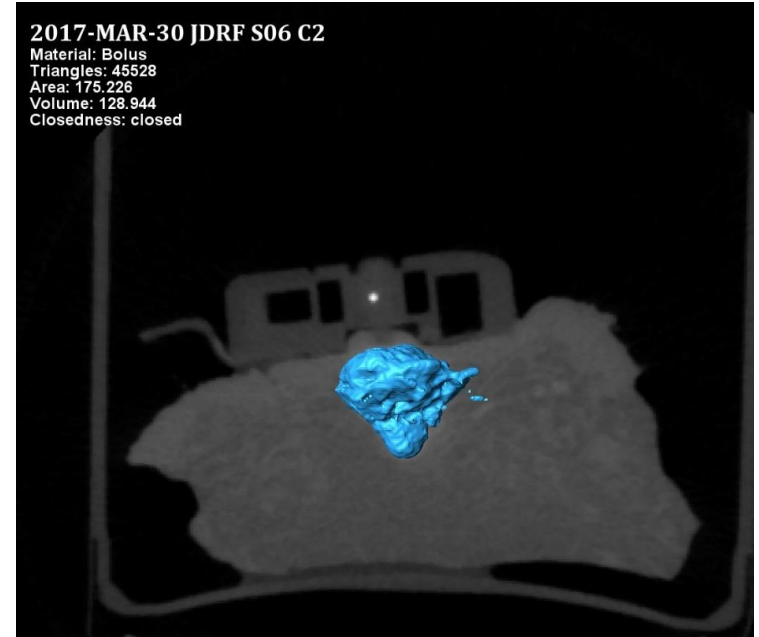

# 90°, Swine S06, 10 Days

Note: kinked cannula

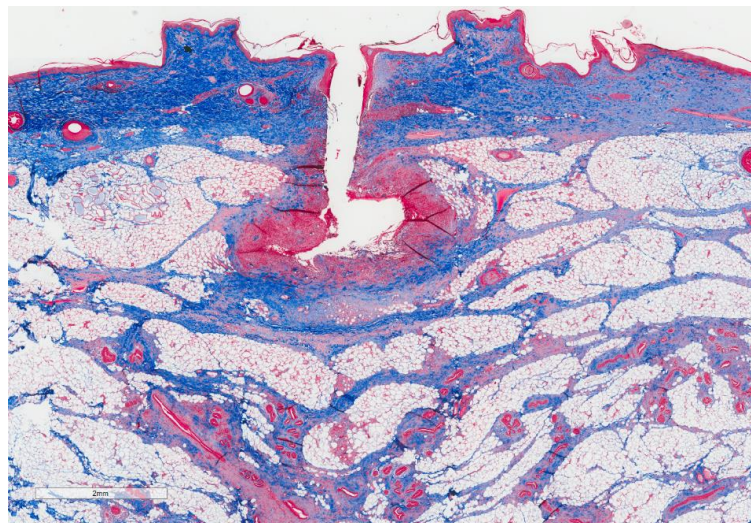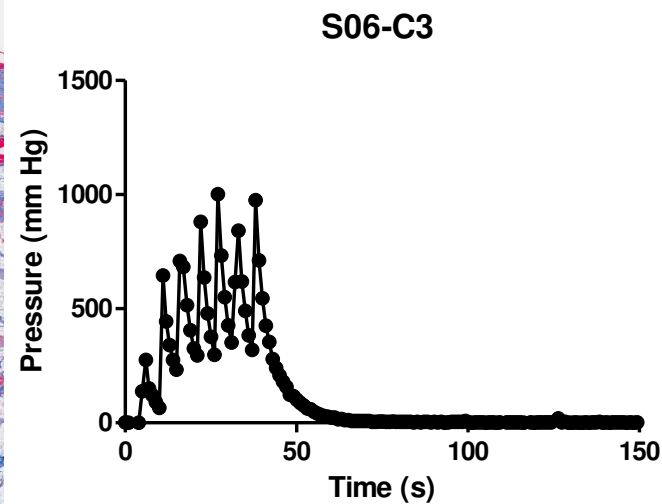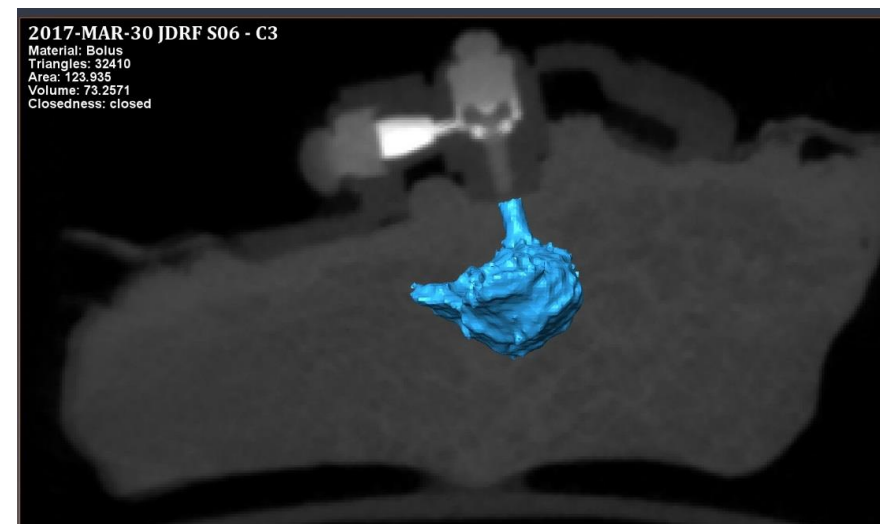

# 90°, Swine S06, 8 Days

Note: leak

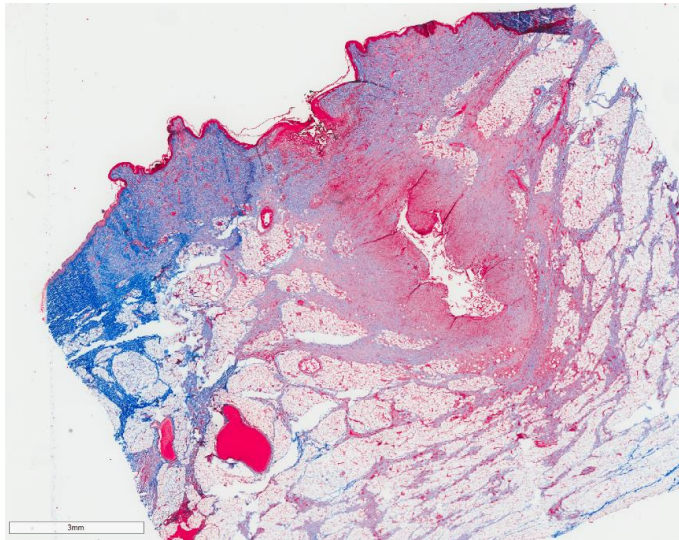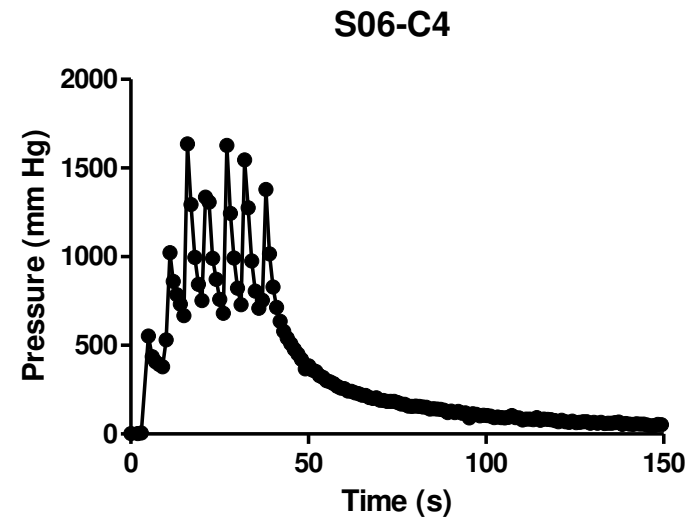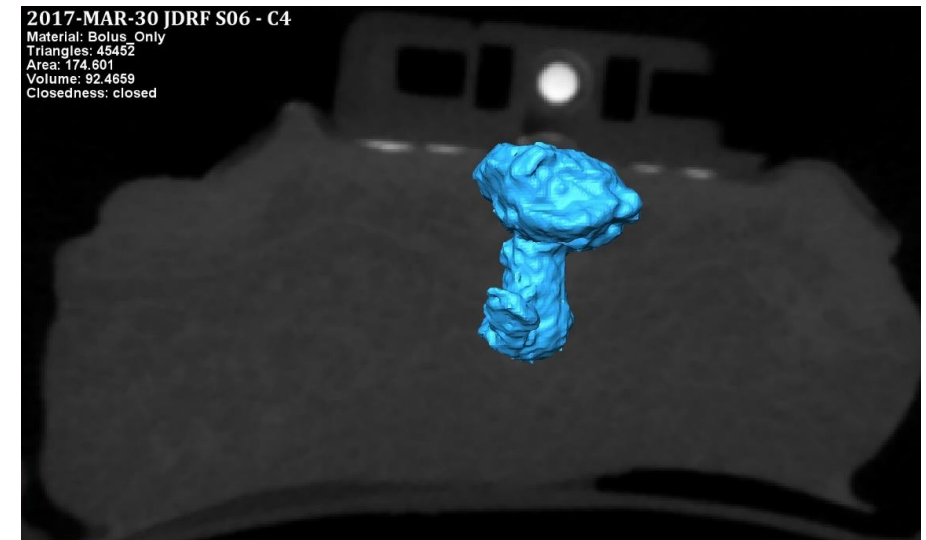

# 90°, Swine S06, 6 Days

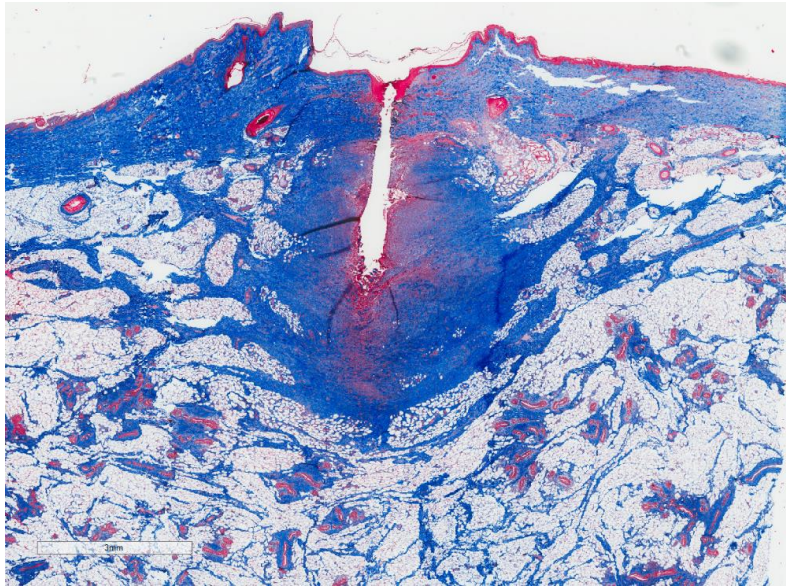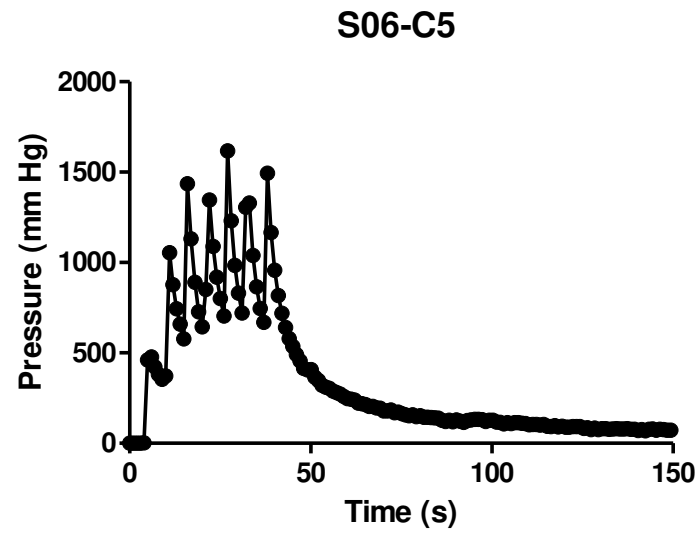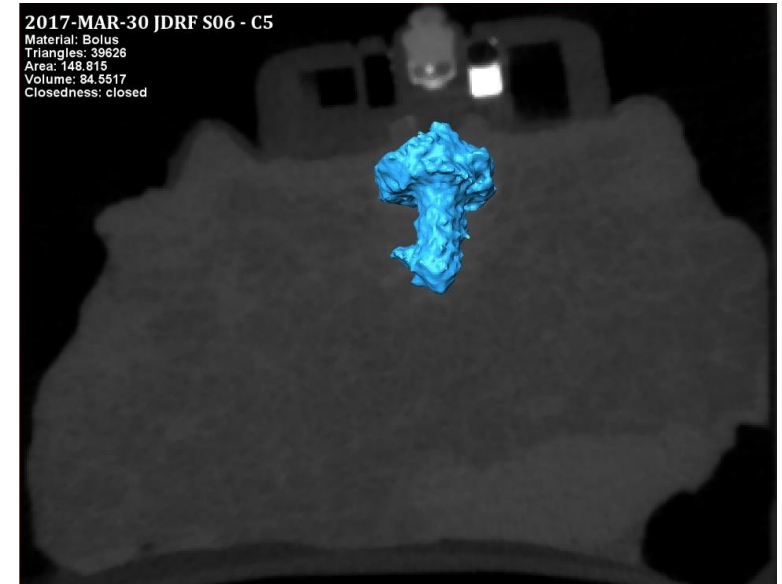

# 90°, Swine S06, 4 Days

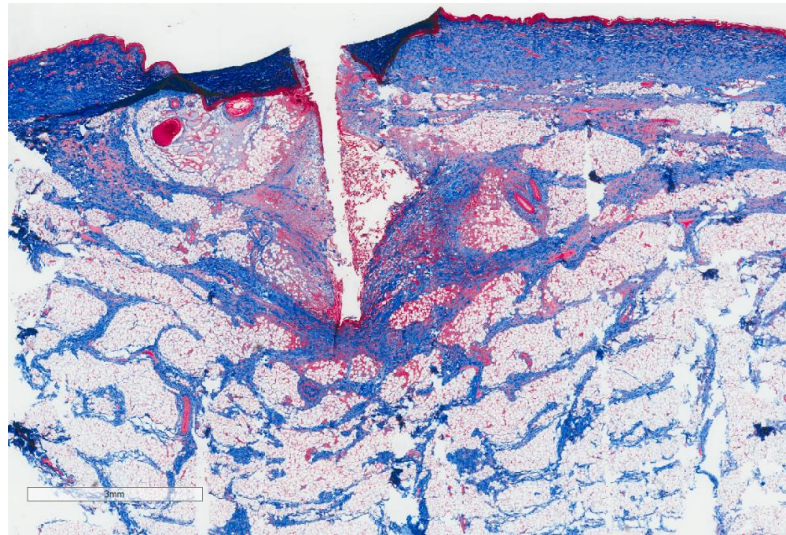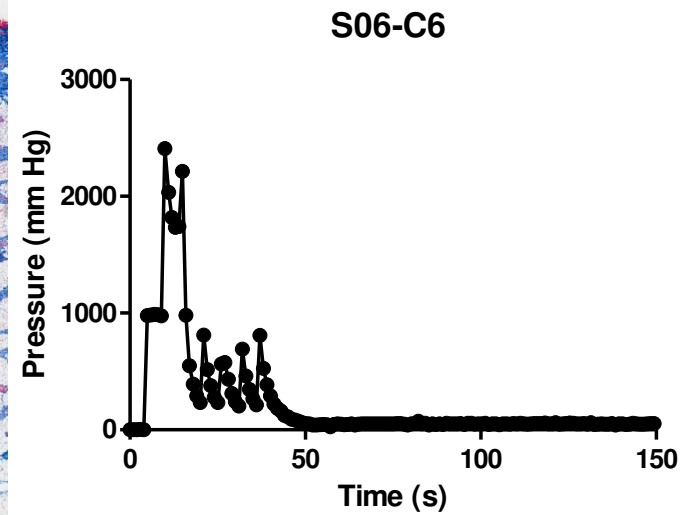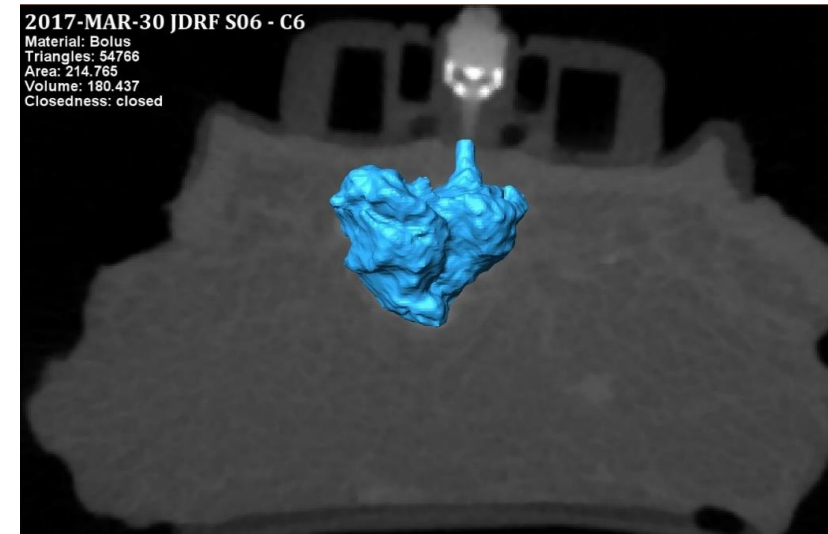



# 90°, Swine S06, 2 Days

Note: leak

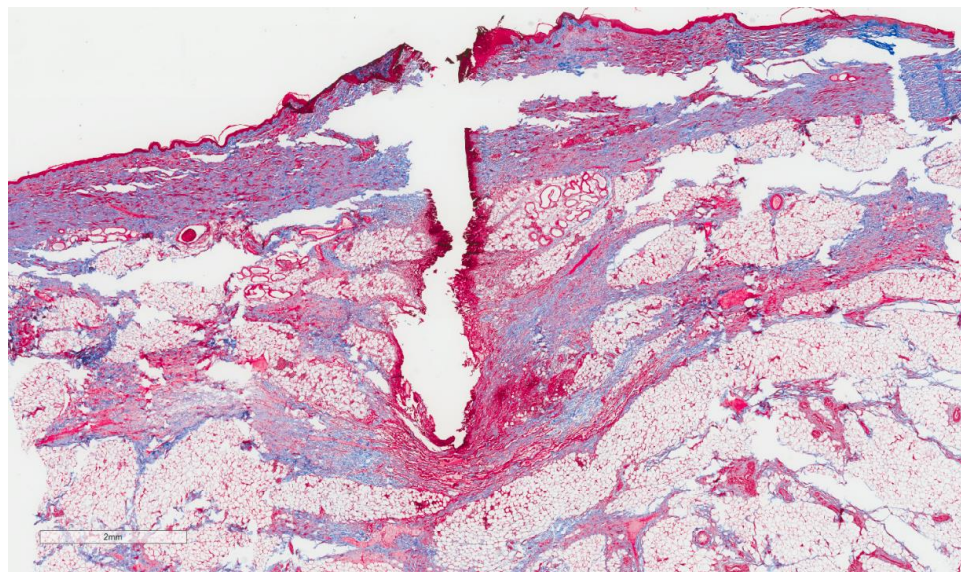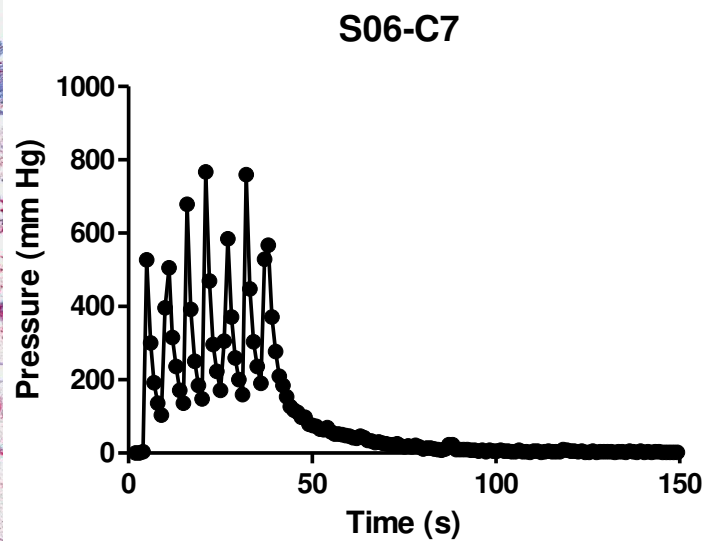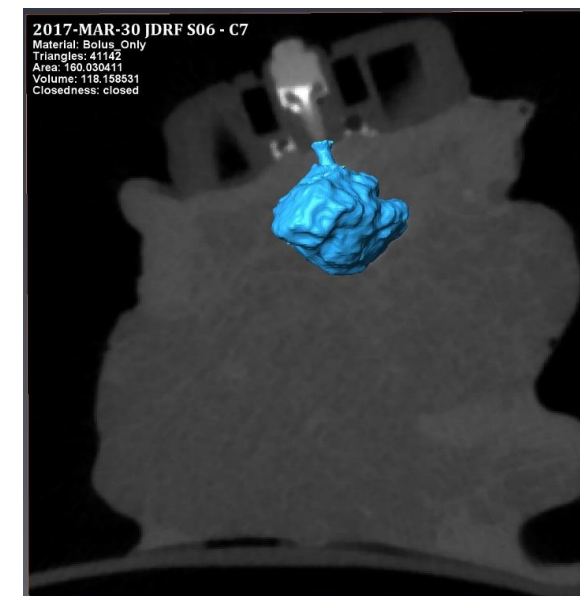

# 90°, Swine S06, Freshly Inserted (Day 1)

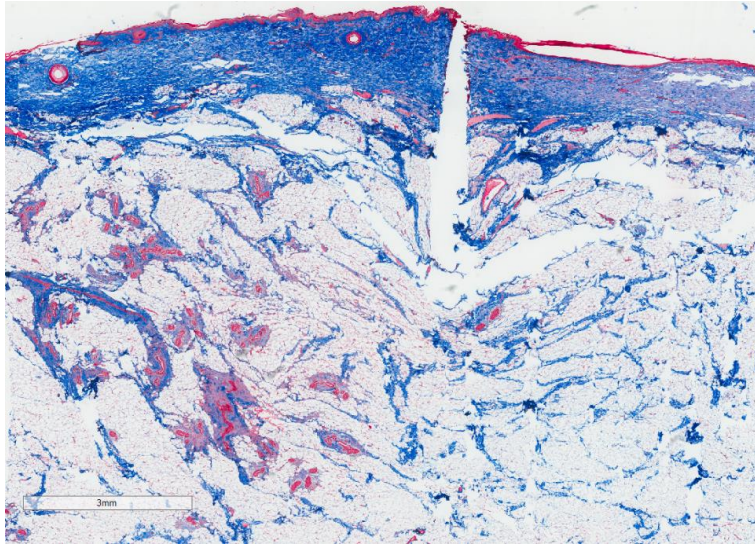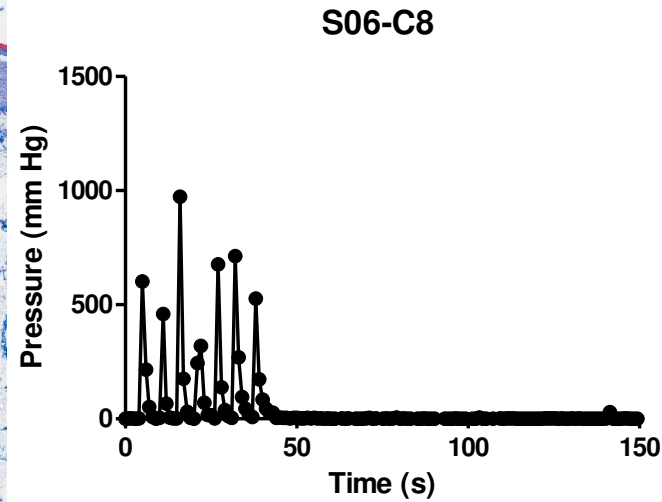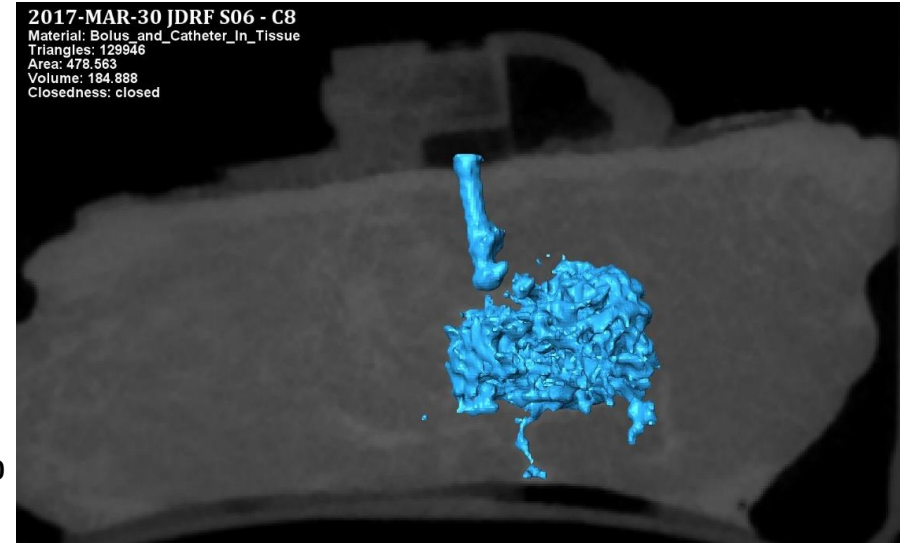

# 90°, Swine S07, 4 Days

Note: kinked cannula

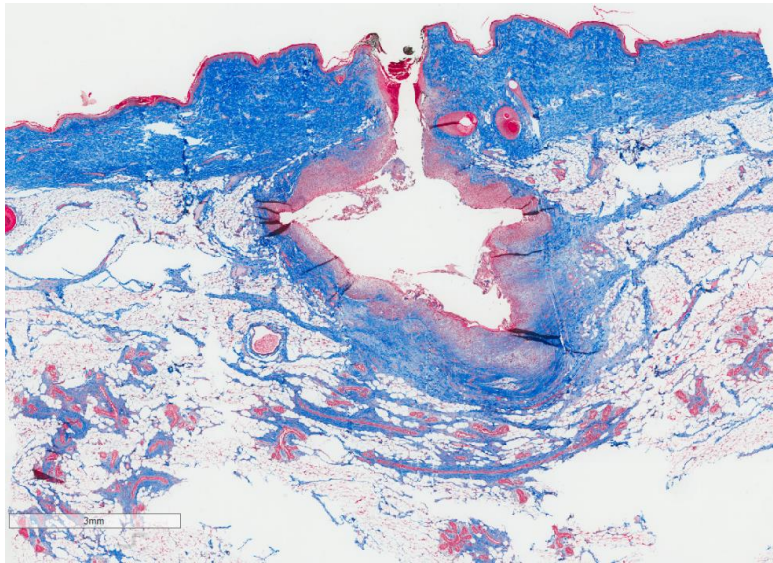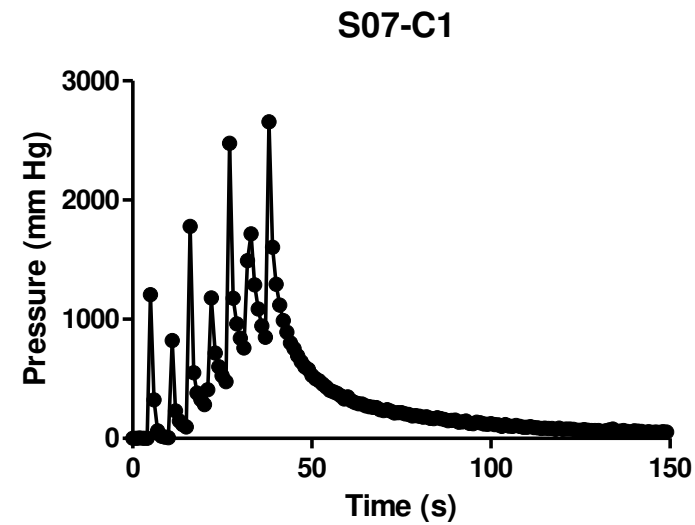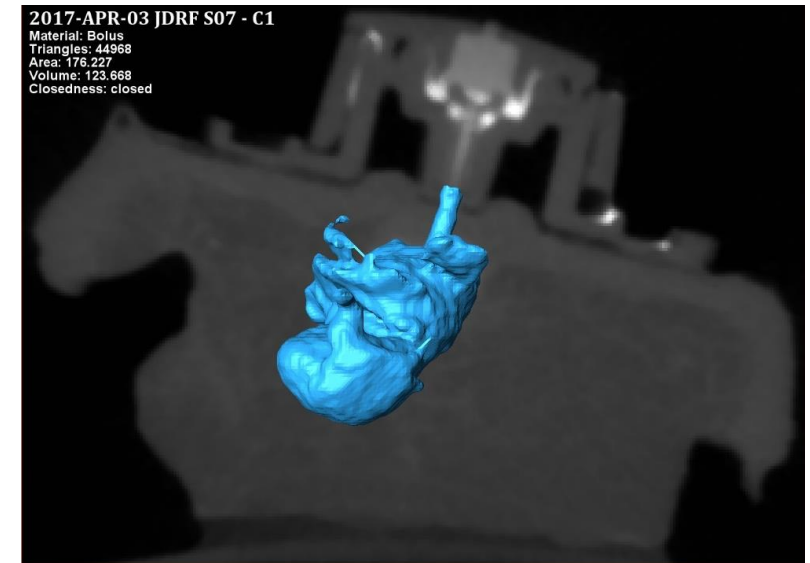

# 90°, Swine S07, 12 Days

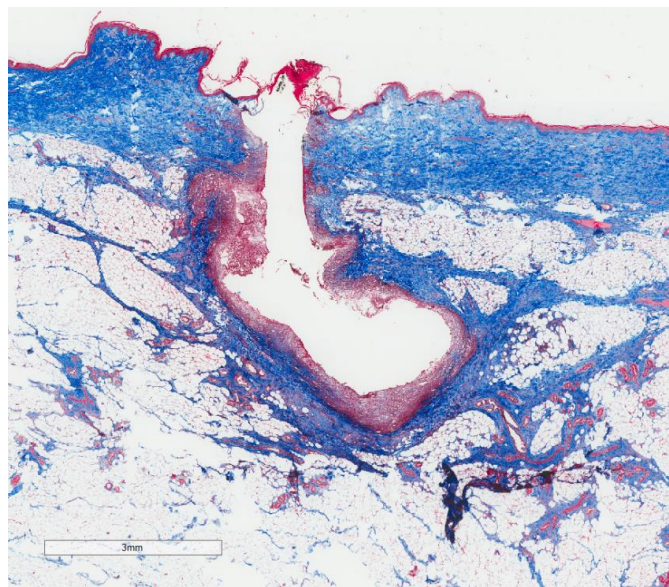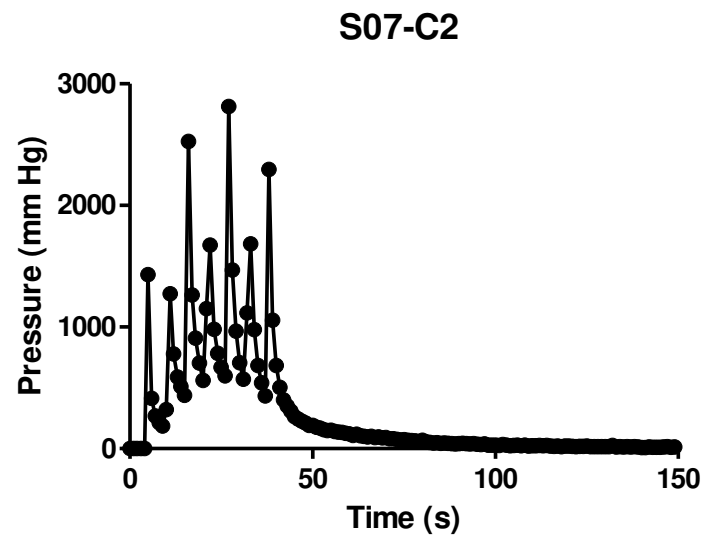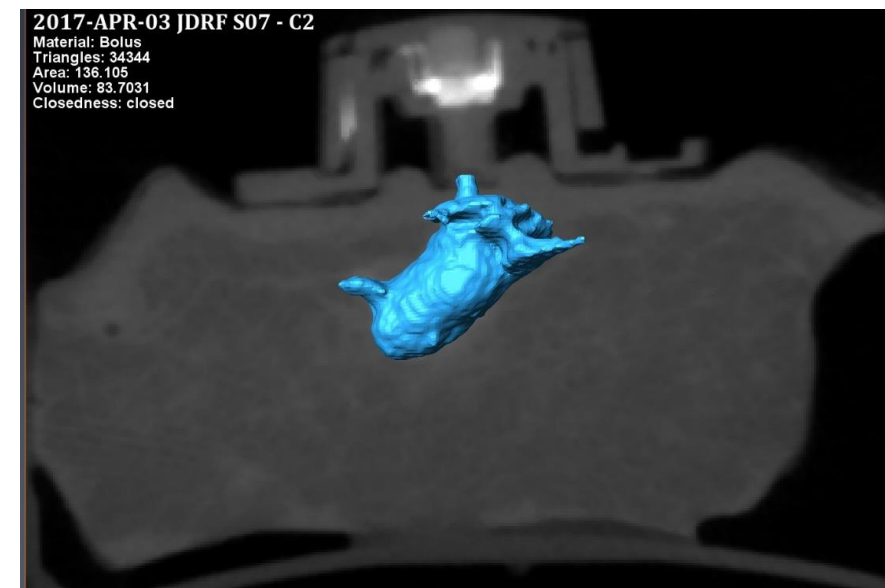

Note: kinked cannula

# 90°, Swine S07, 10 Days

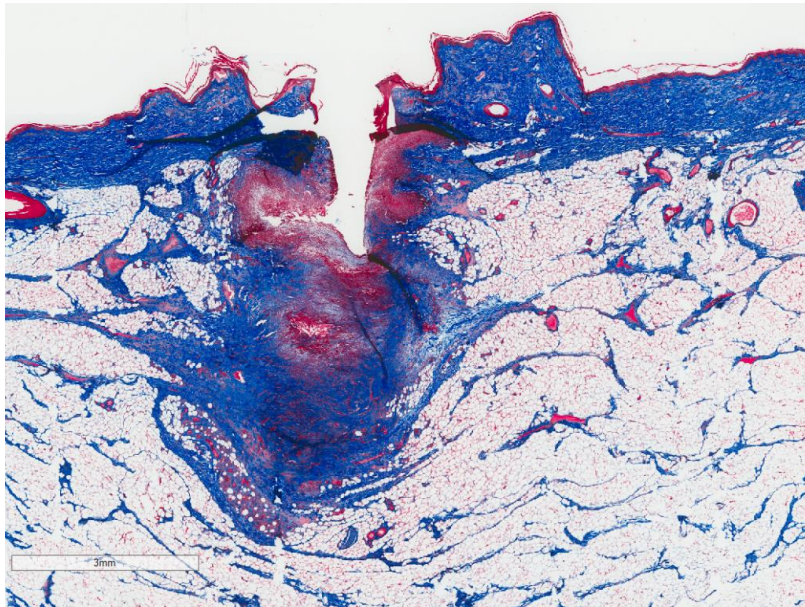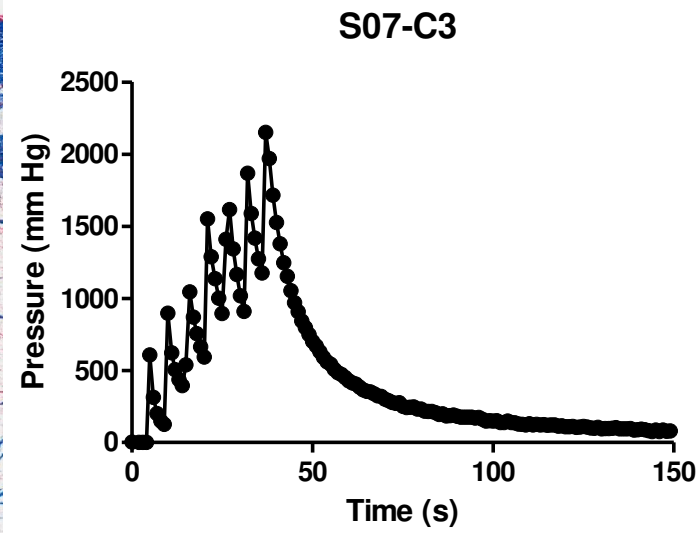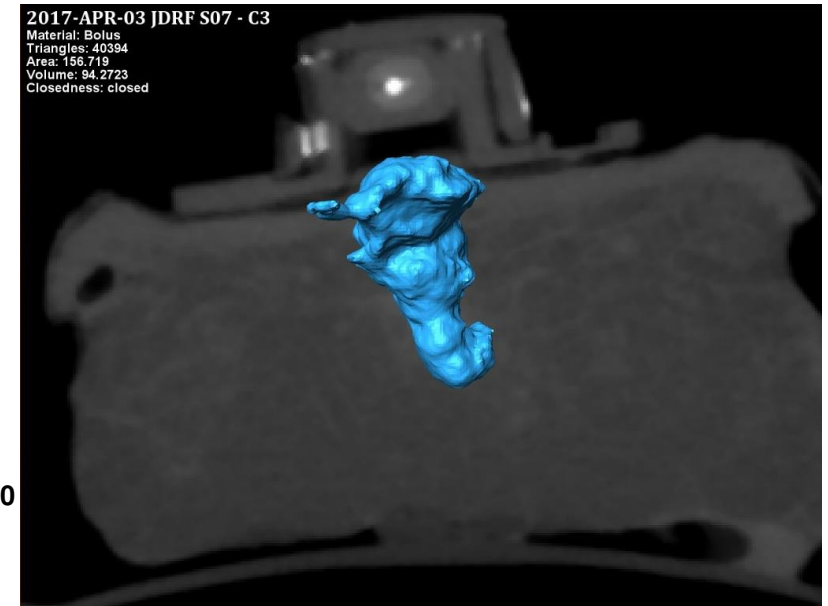

# 90°, Swine S07, 8 Days

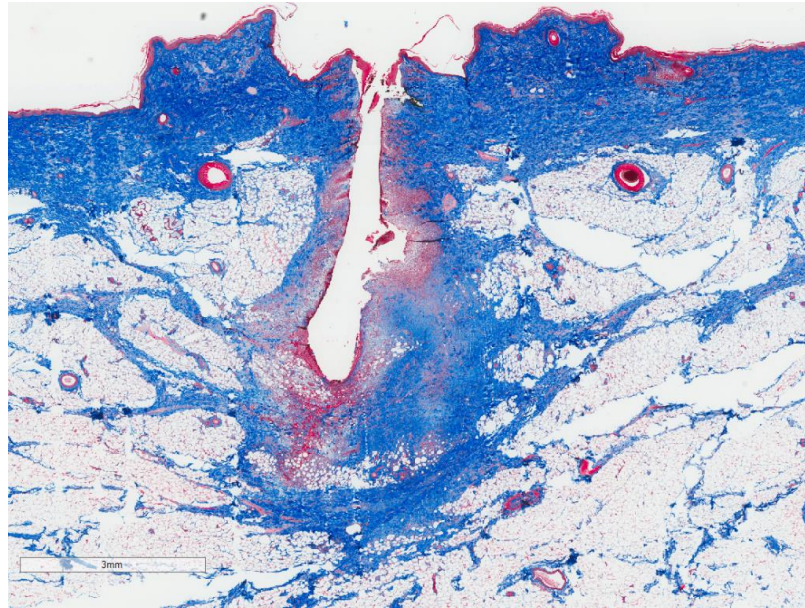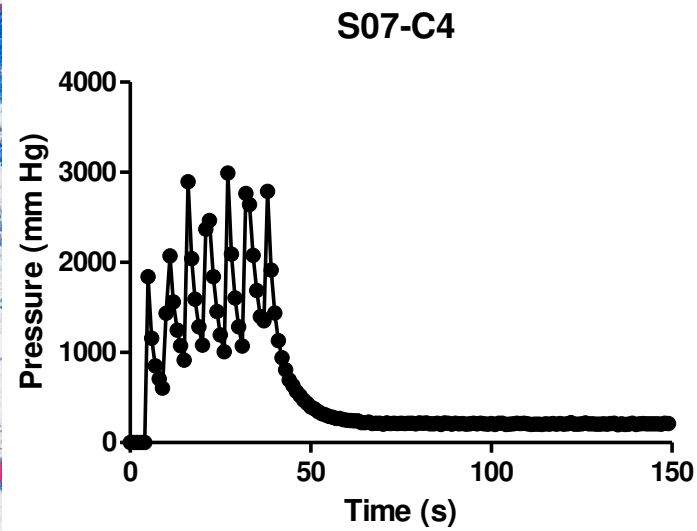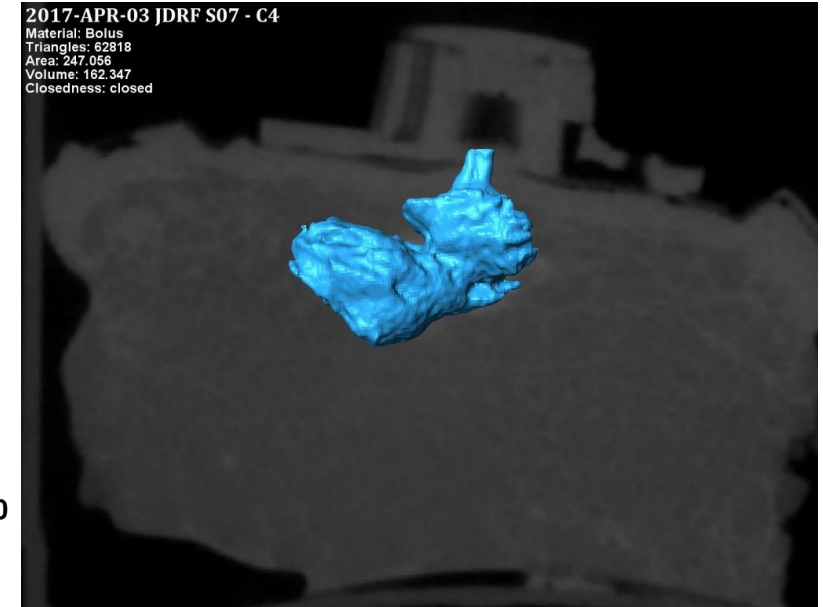

Note: kinked cannula

# 90°, Swine S07, 6 Days

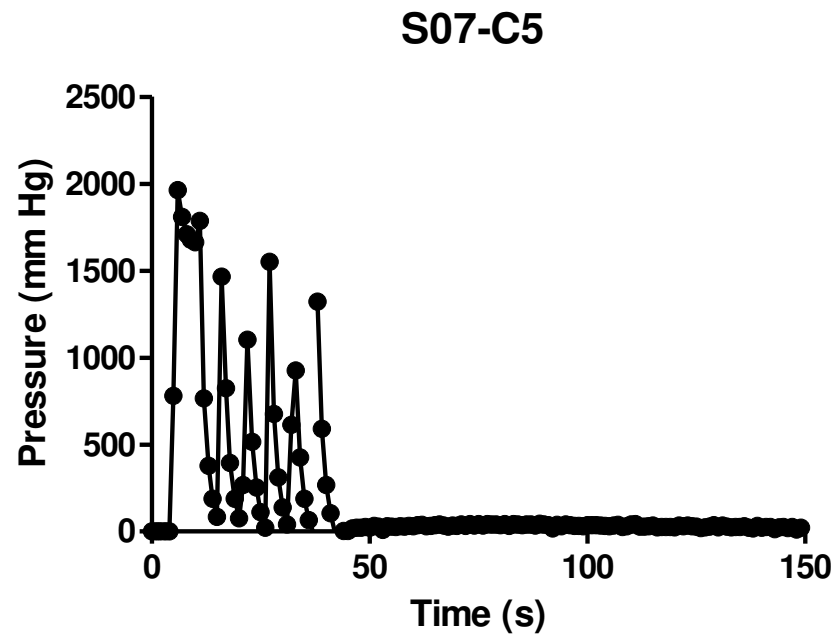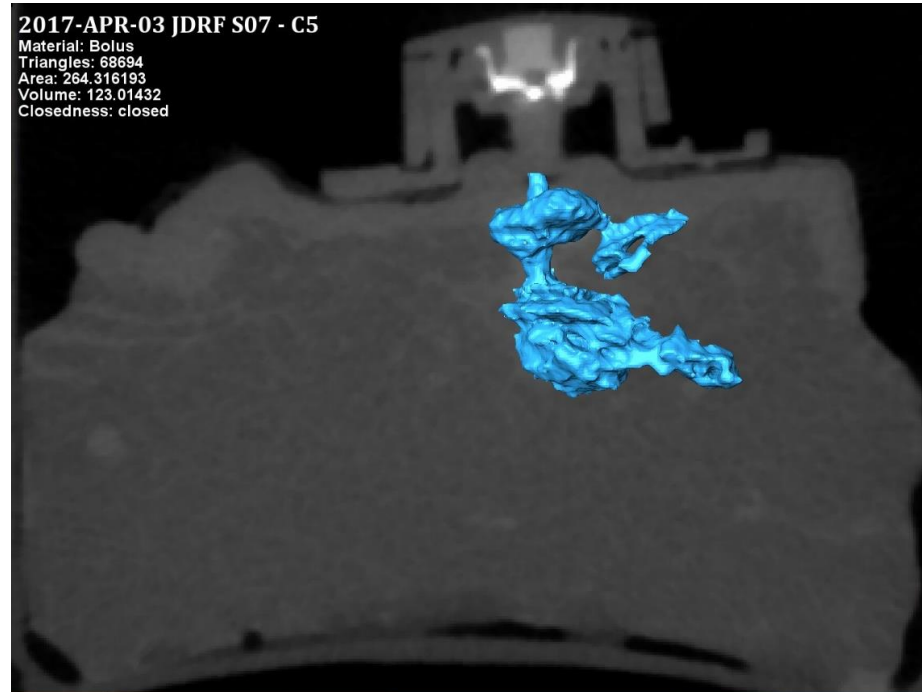

# 90°, Swine S07, 4 Days

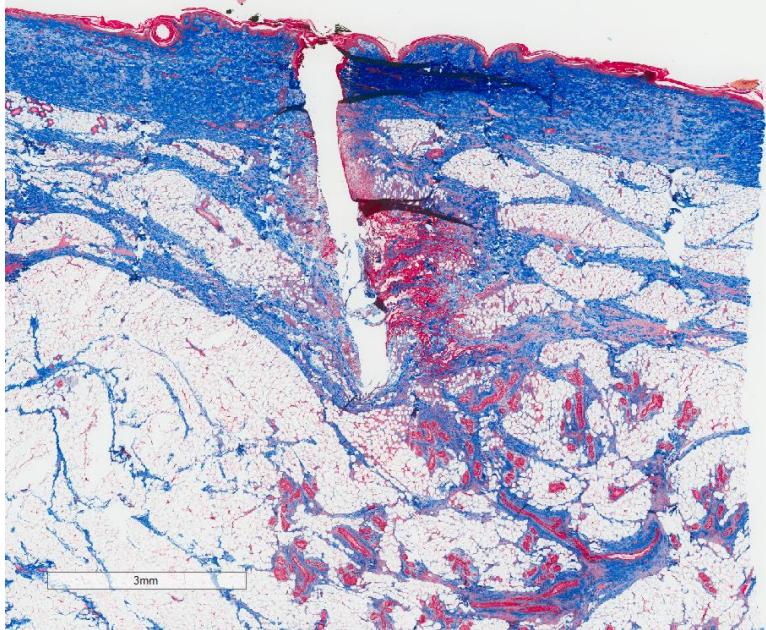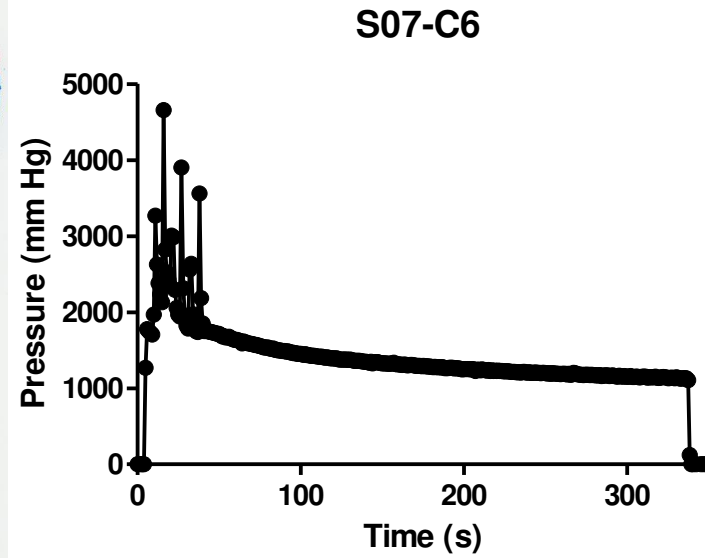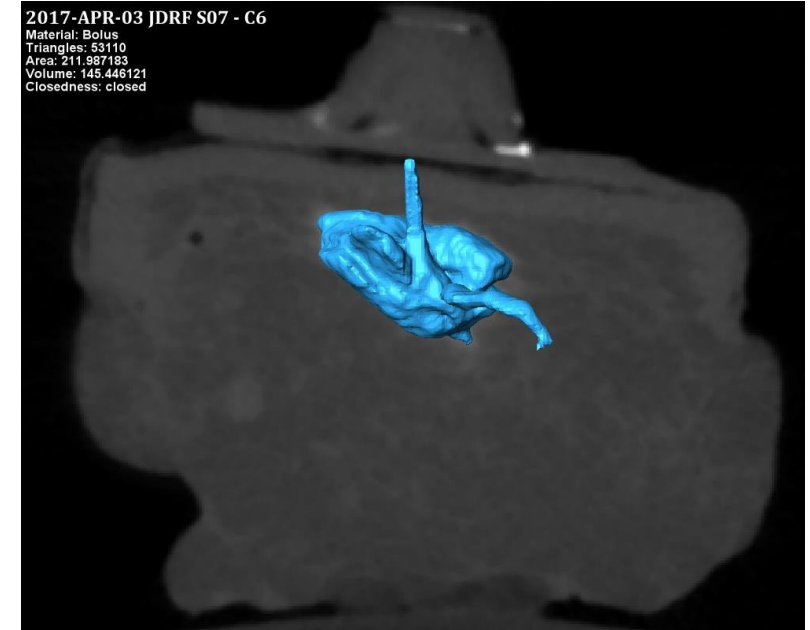



# 90°, Swine S07, 2 Days

Note: leak

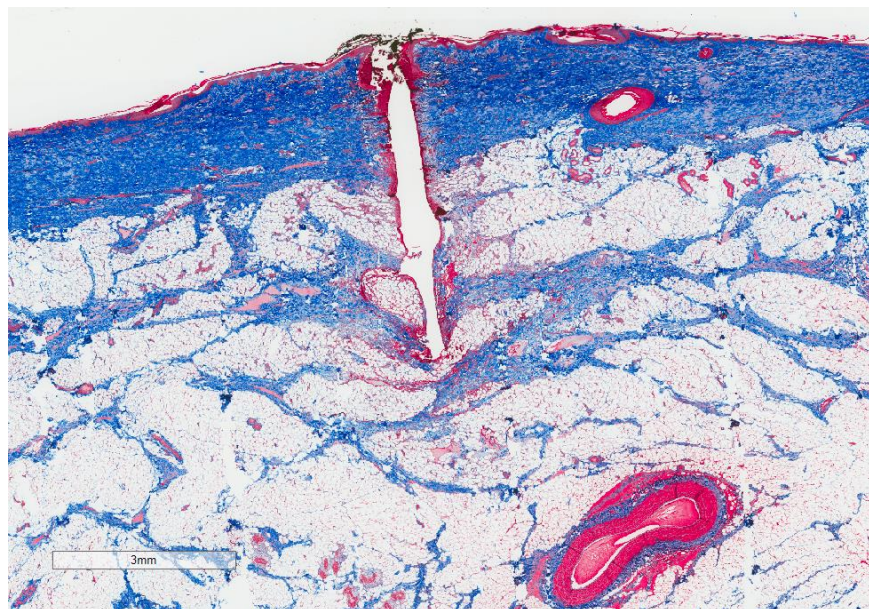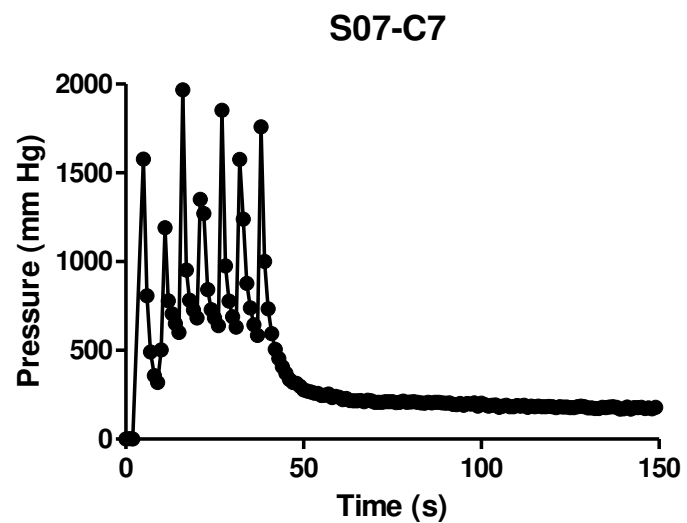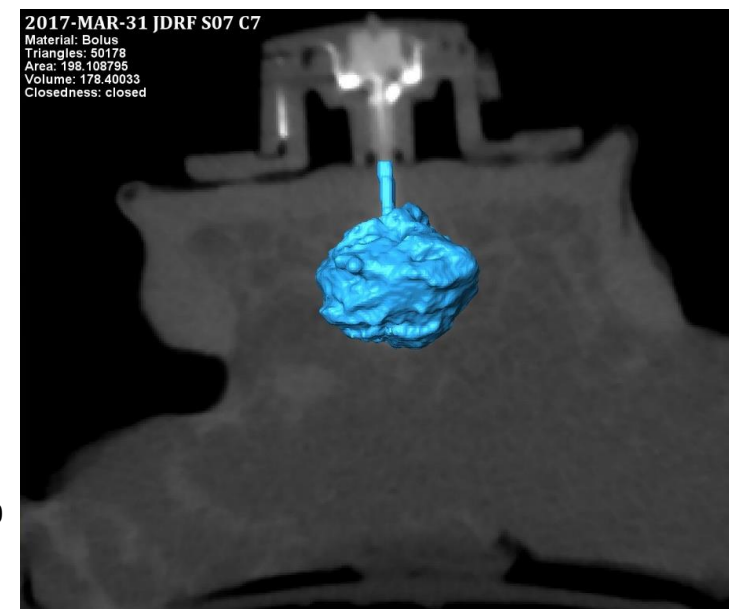

# 90°, Swine S07, Freshly Inserted (Day 1)

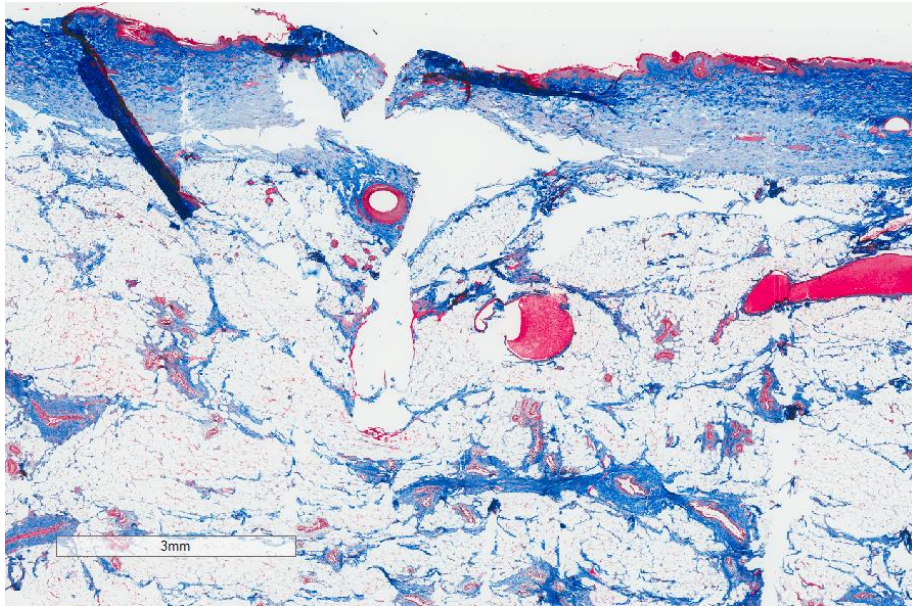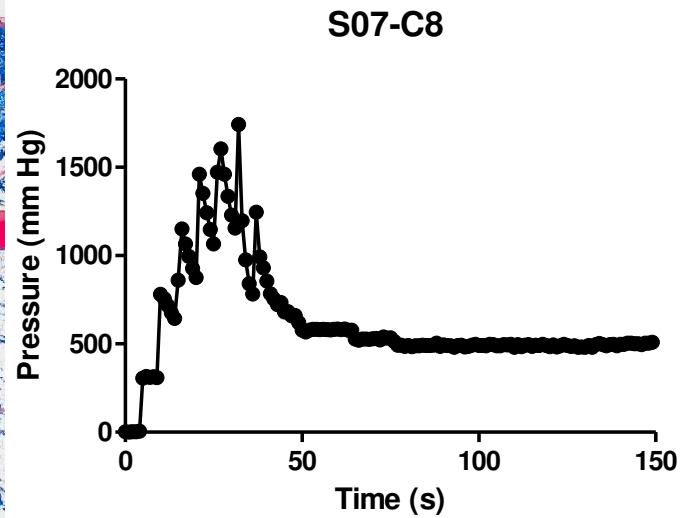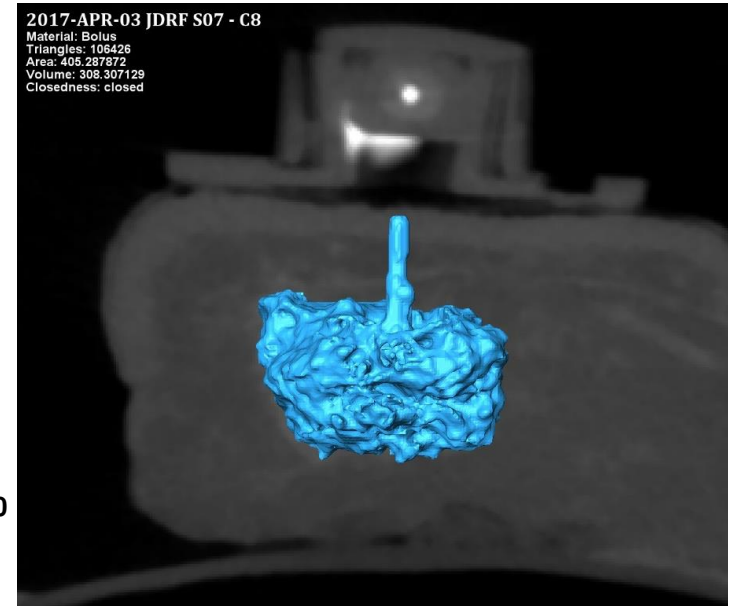

# 30° Angled Teflon IISs

# 30°, Swine S13, 14 Days

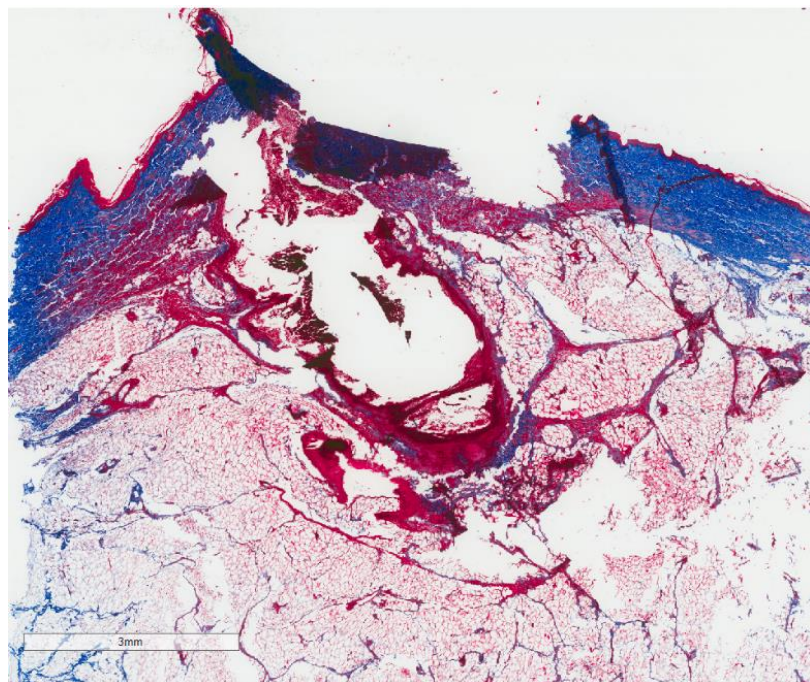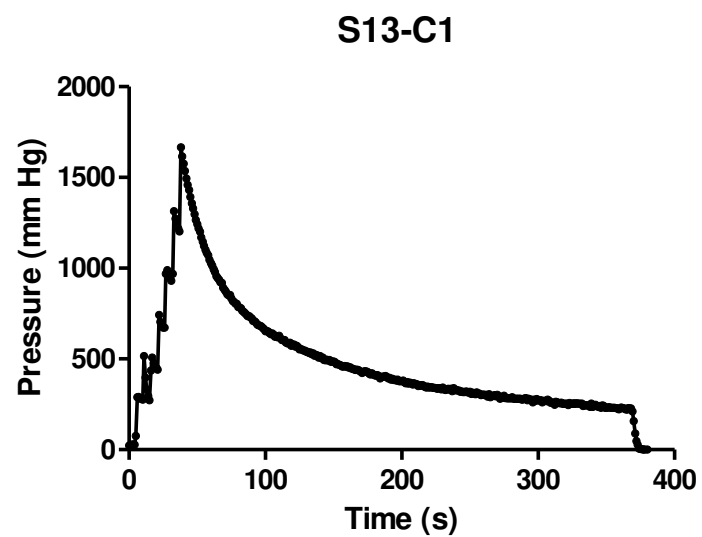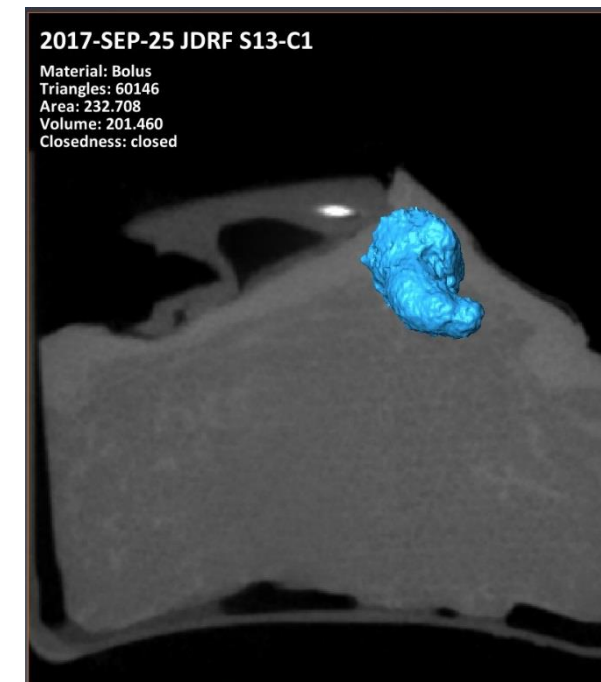

# 30°, Swine S13, 12 Days

Note: kinked cannula  
leak

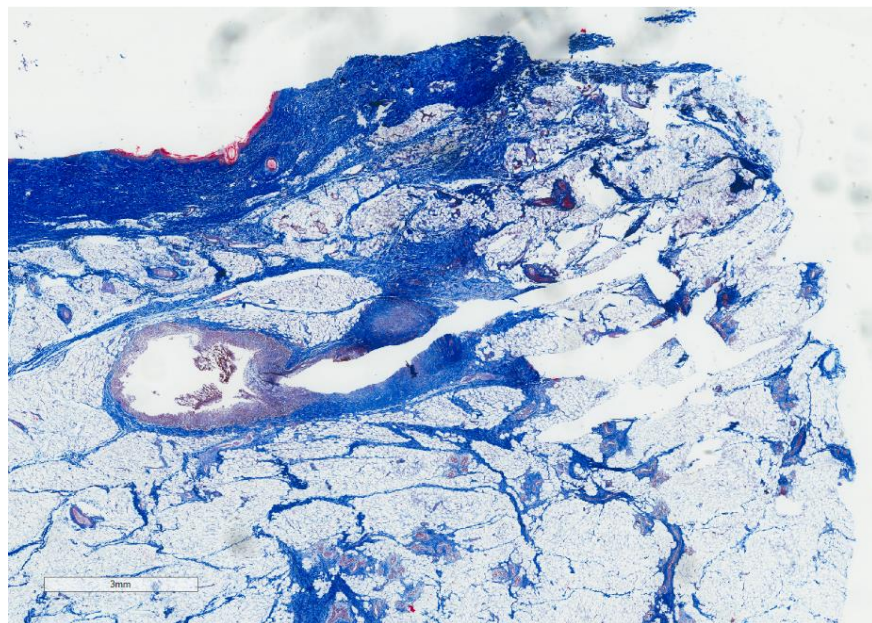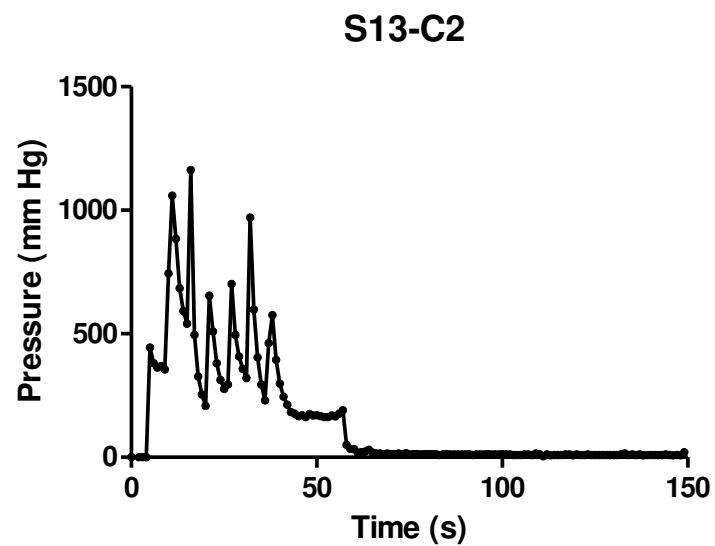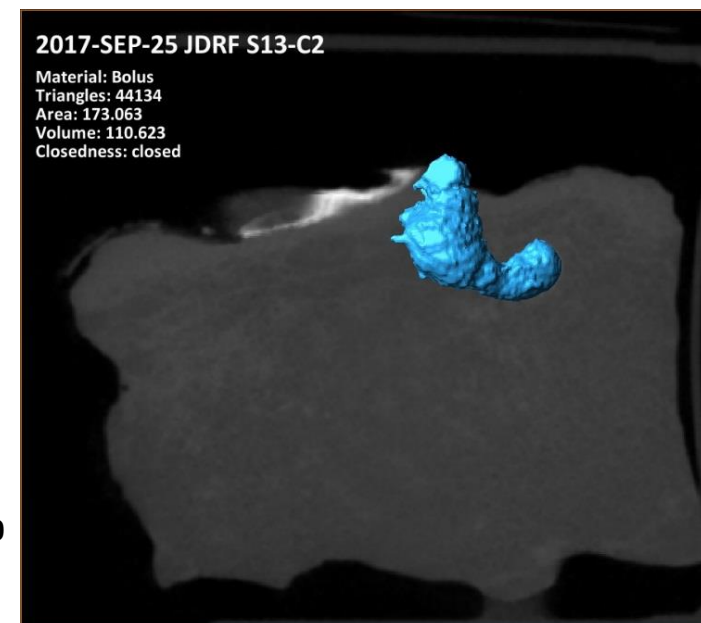

# 30°, Swine S13, 10 Days

Note: kinked cannula

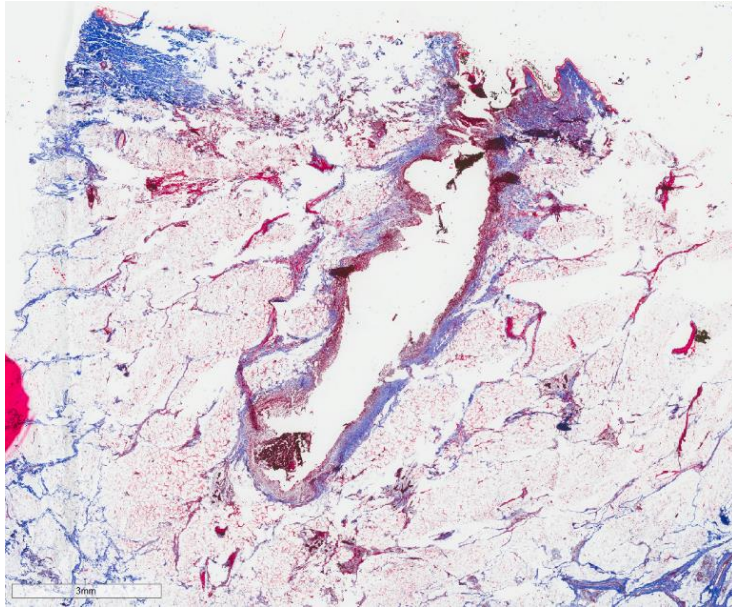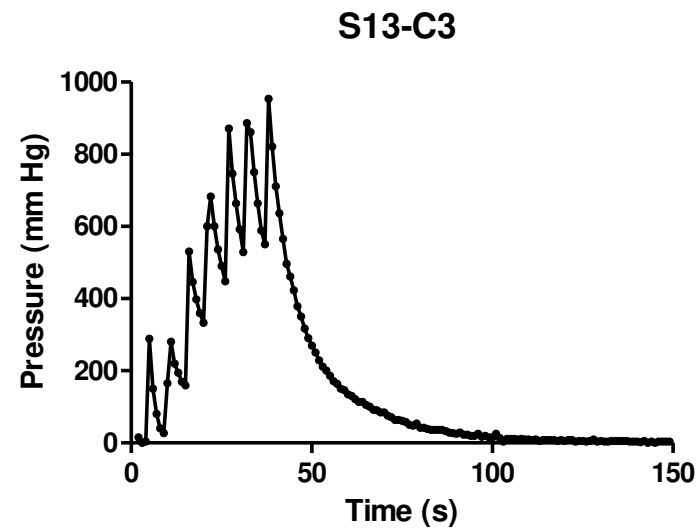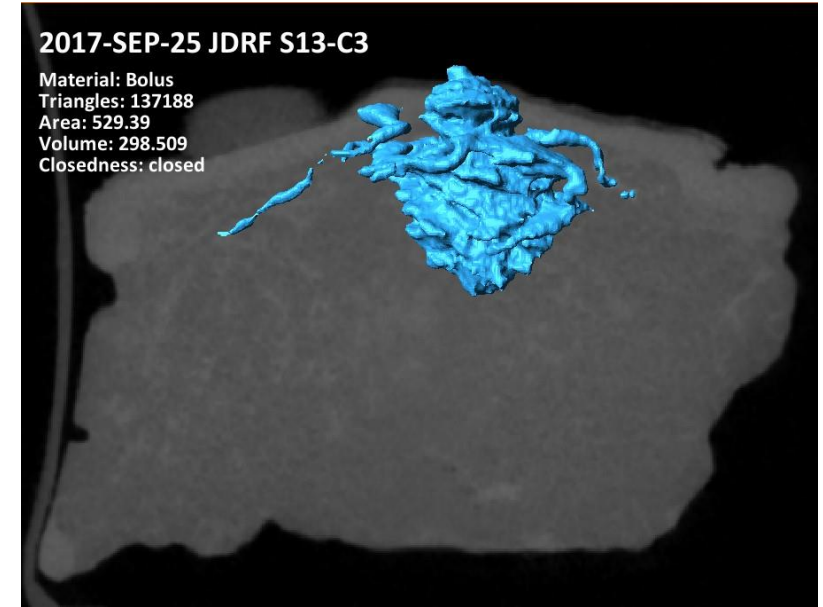

# 30°, Swine S13, 8 Days

Note:  
accidentally removed  
before excision

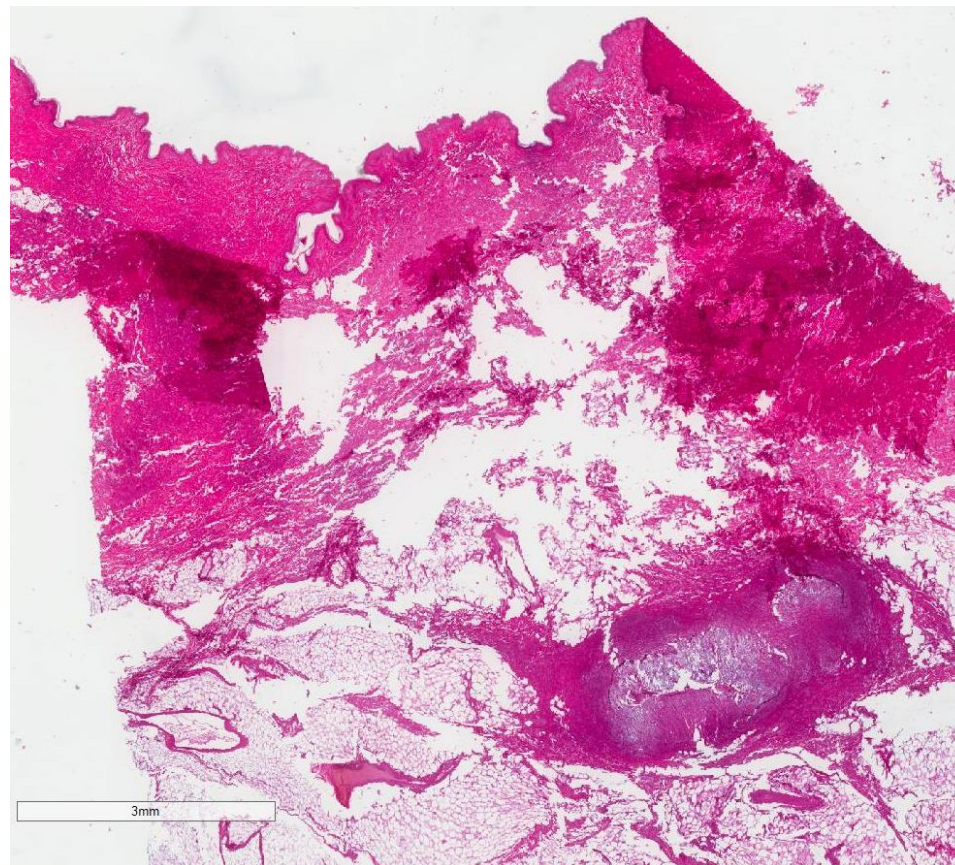

# 30°, Swine S13, 6 Days

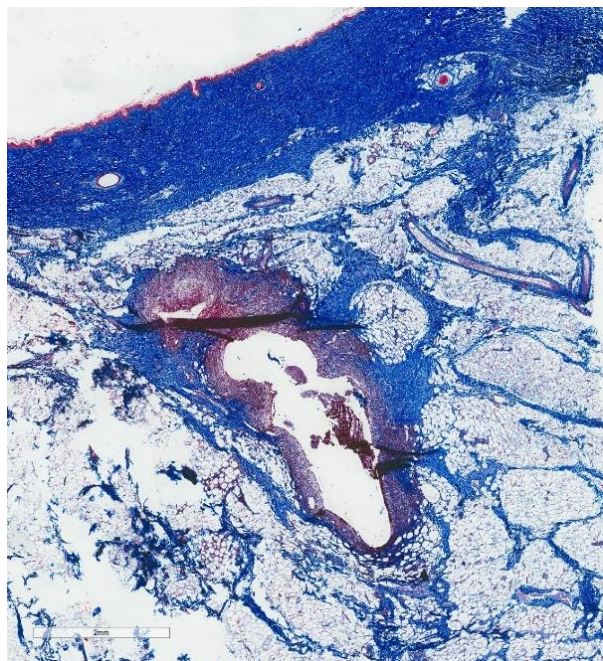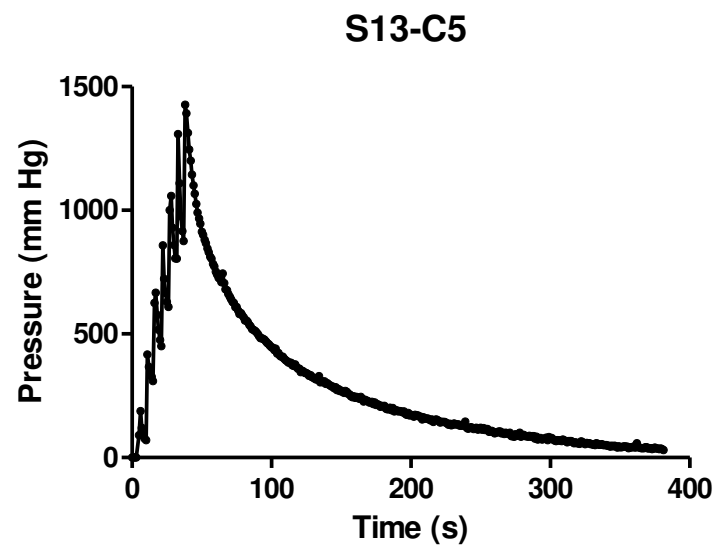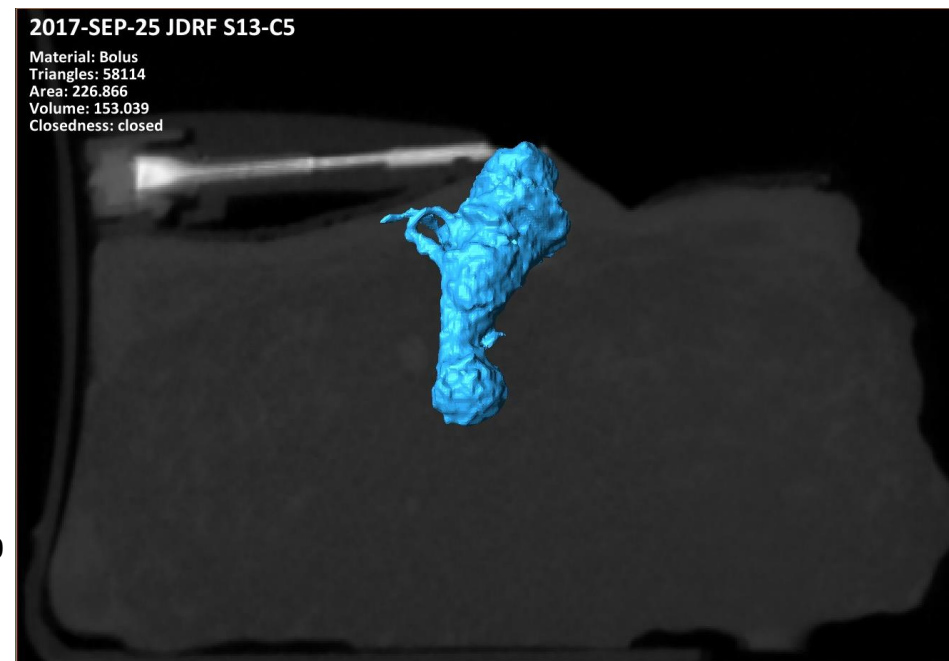

Note: kinked cannula  
leak



# 30°, Swine S13, 4 Days

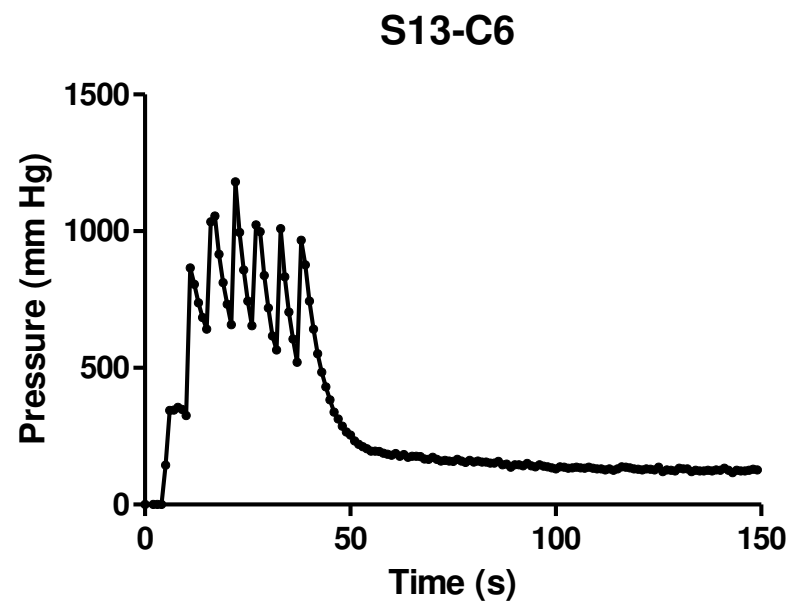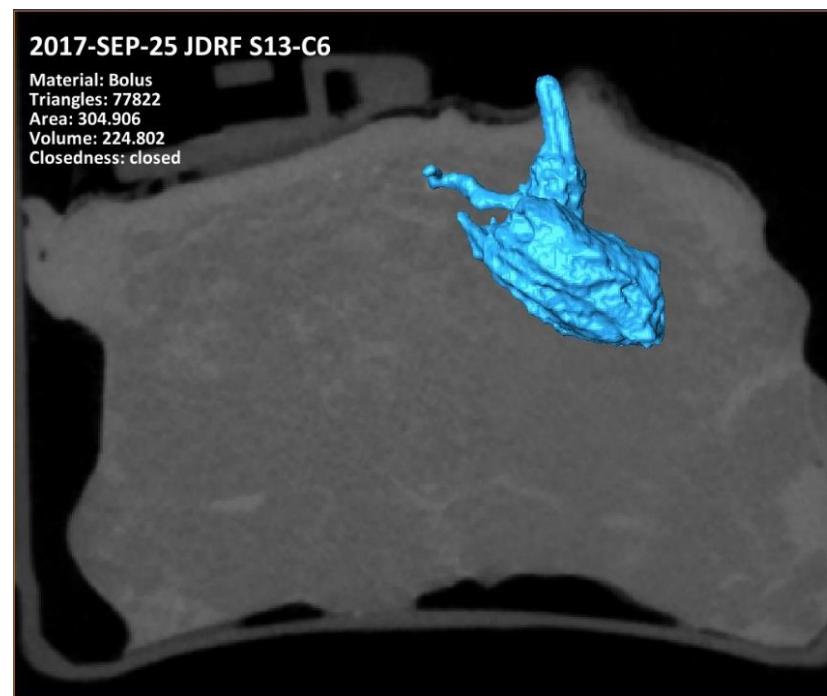

# 30°, Swine S13, 2 Days

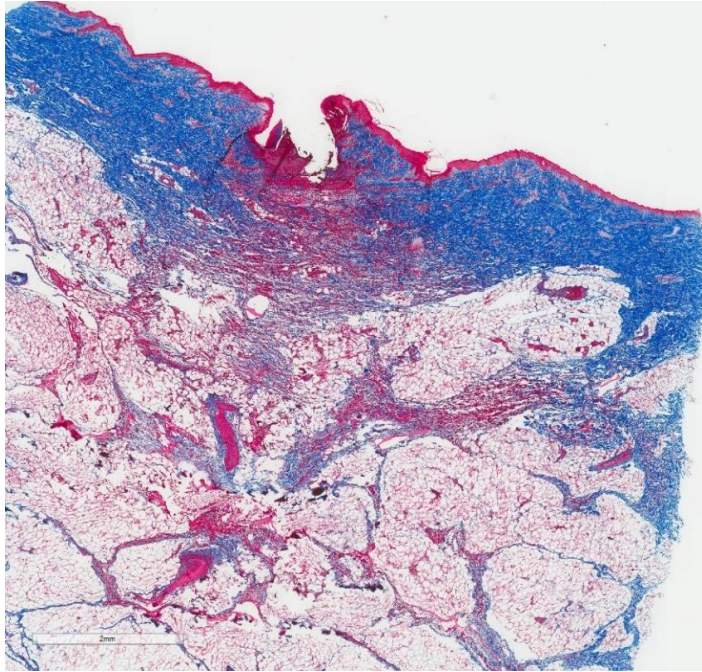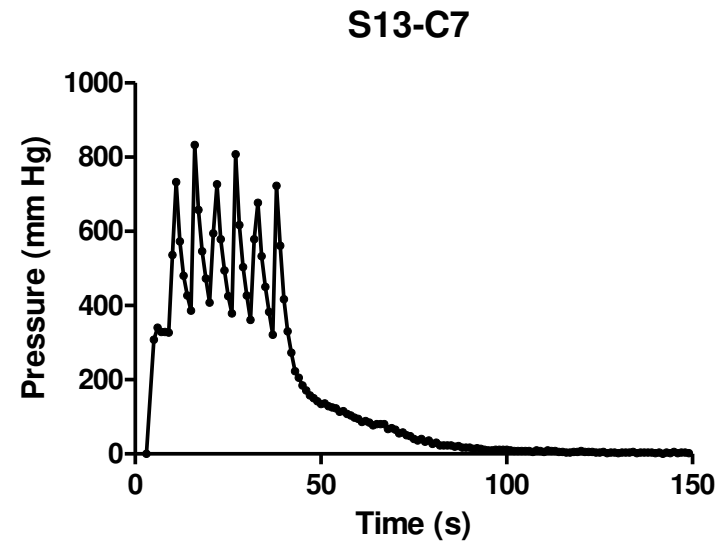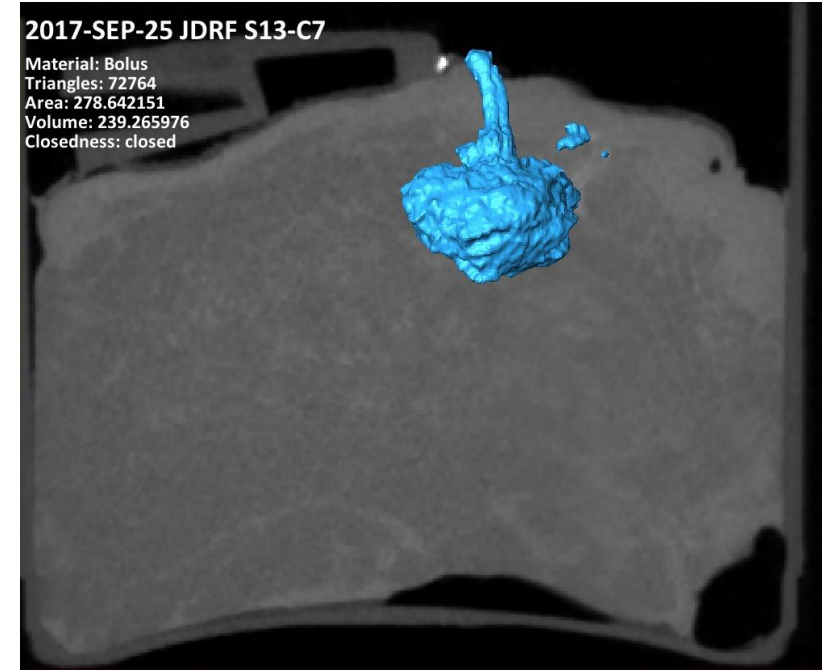

Note: kinked cannula  
leak

# 30°, Swine S13, Freshly Inserted (Day 1)

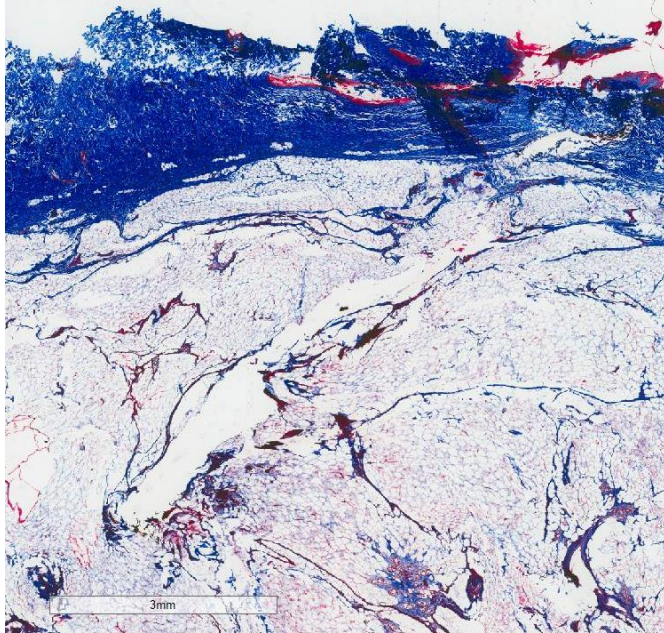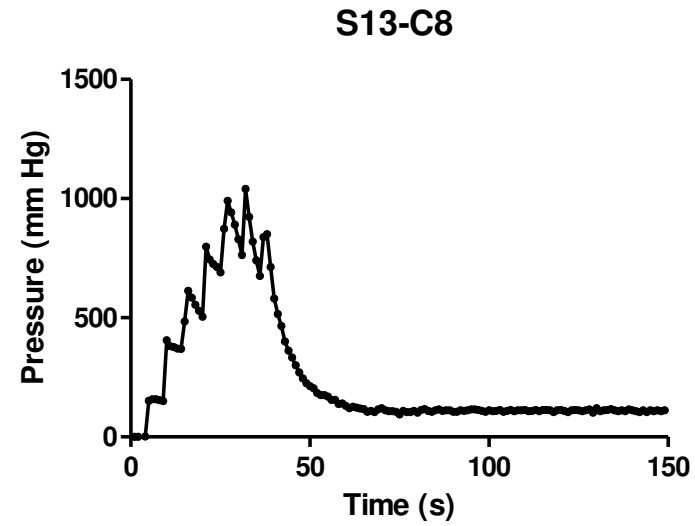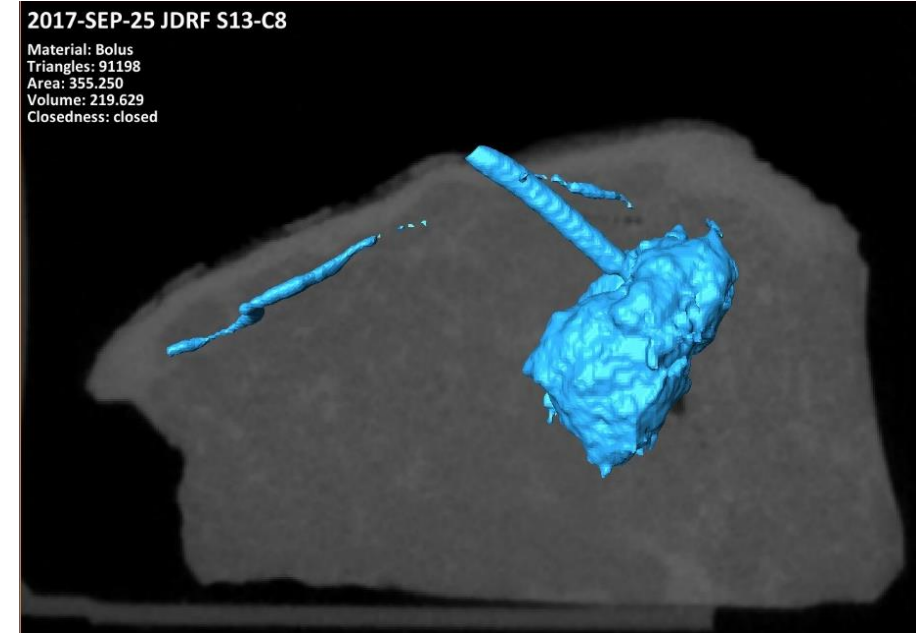

# 30°, Swine S14, 14 Days

Note: kinked cannula

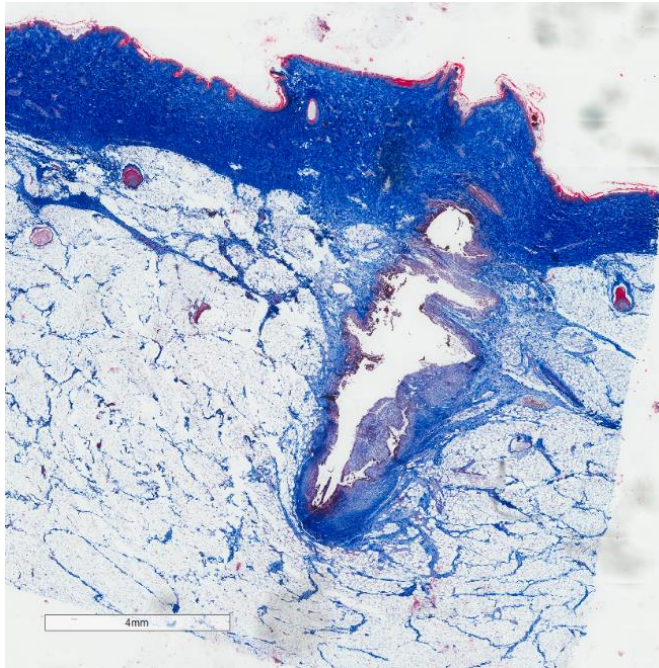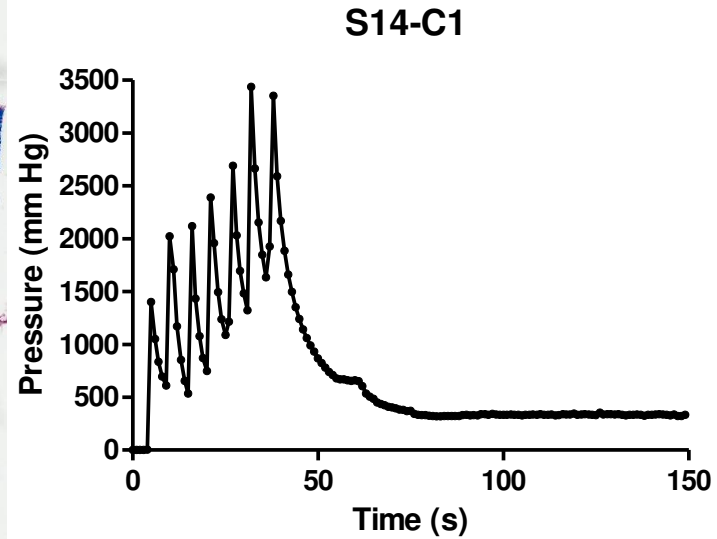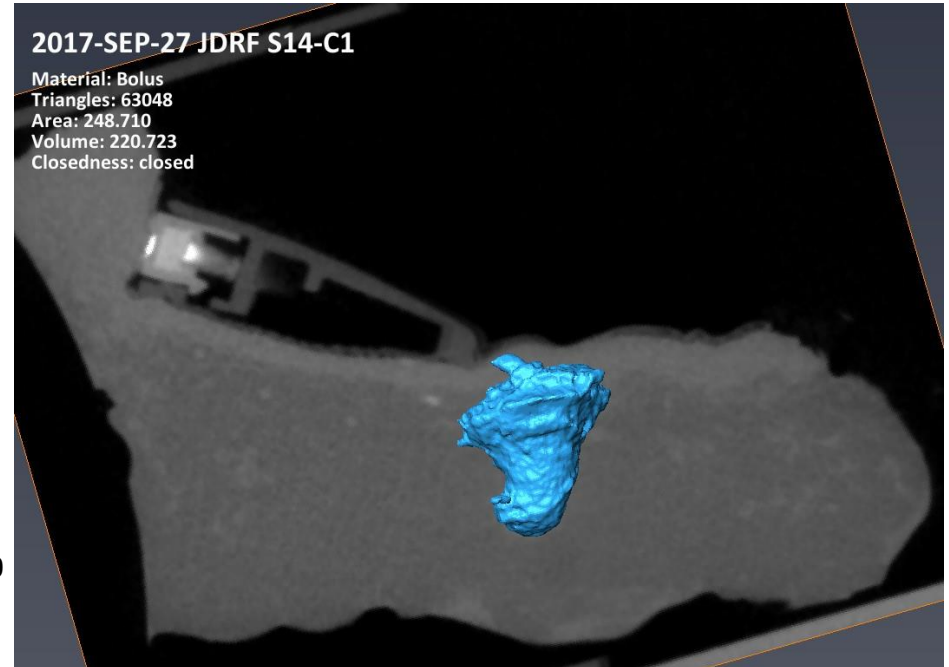

# 30°, Swine S14, 12 Days

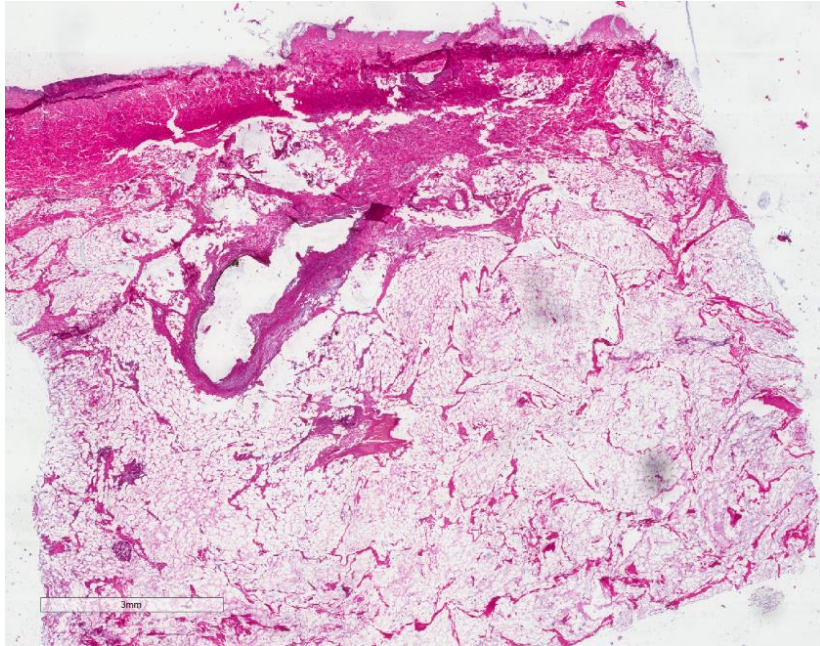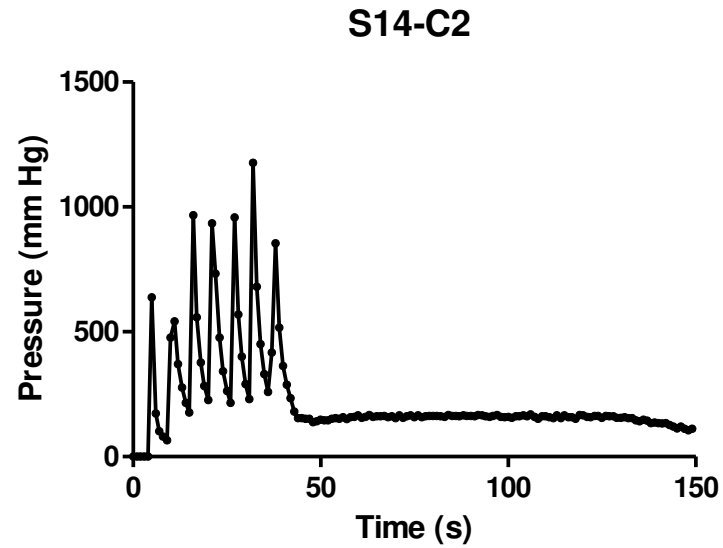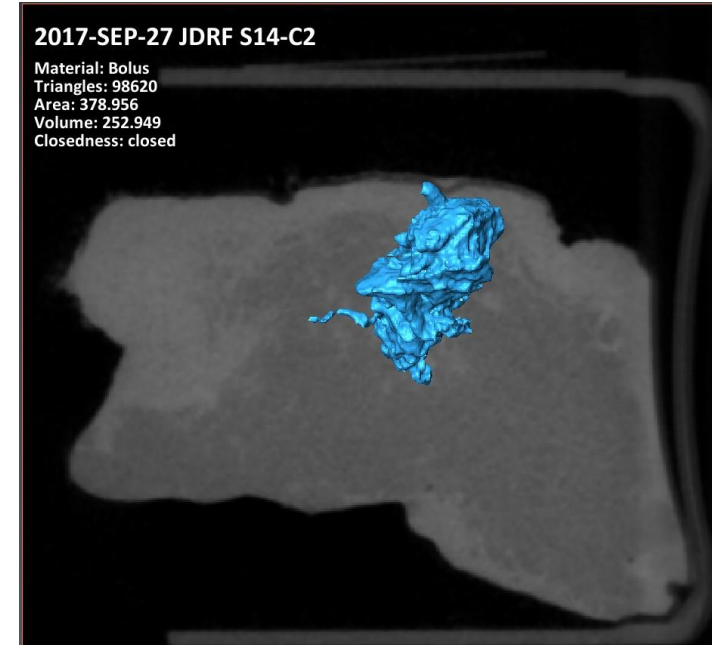

# 30°, Swine S14, 10 Days

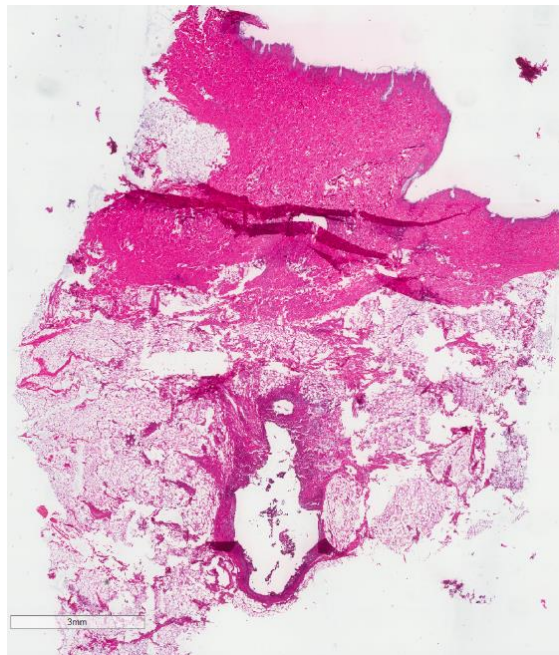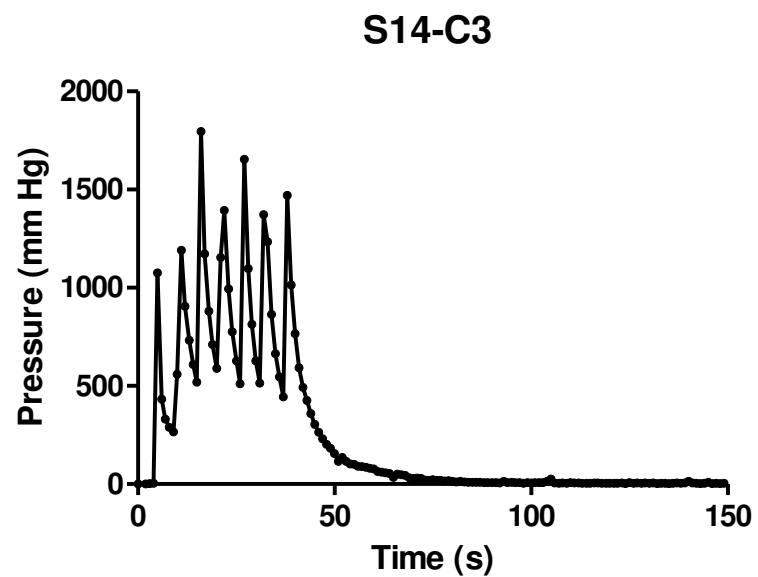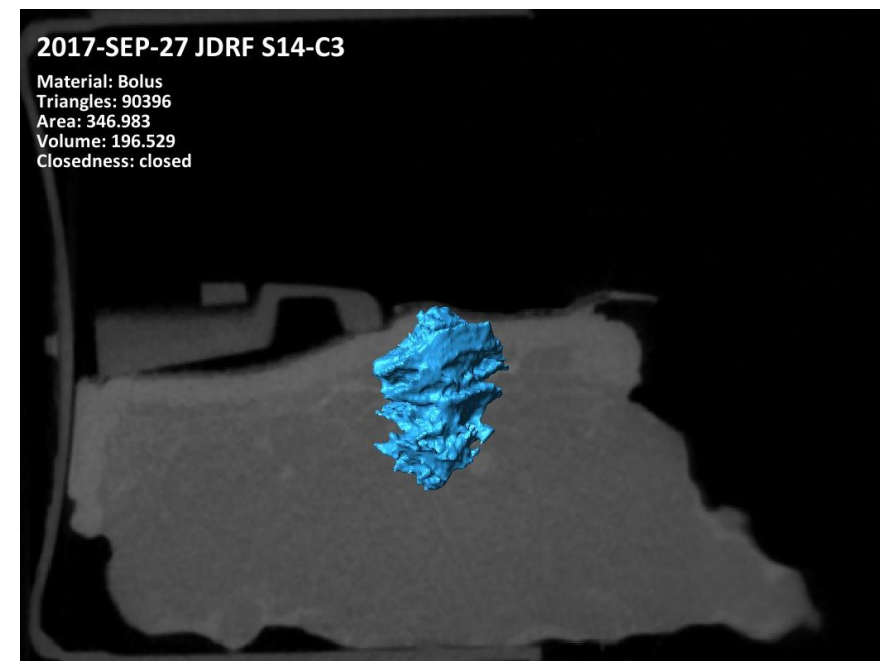

Note: kinked cannula  
leak

# 30°, Swine S14, 8 Days

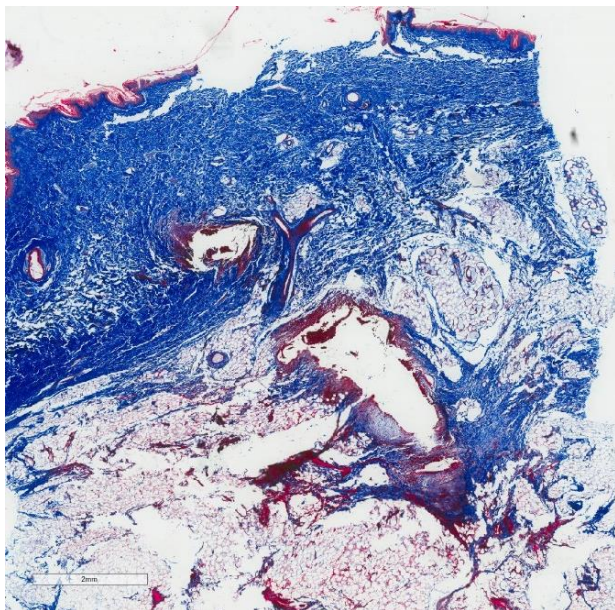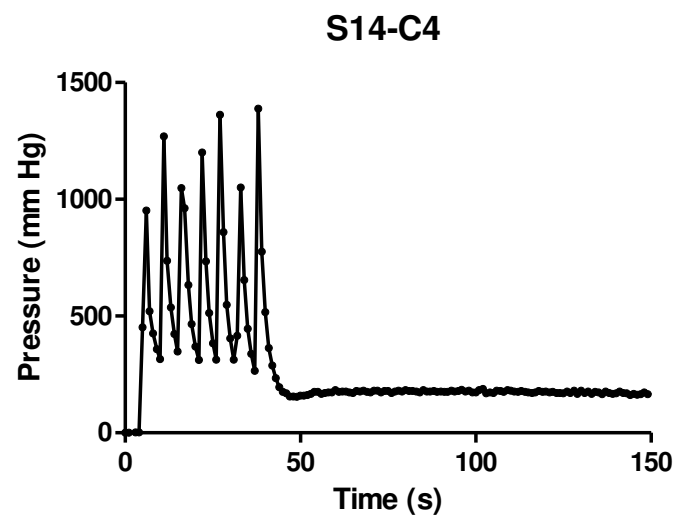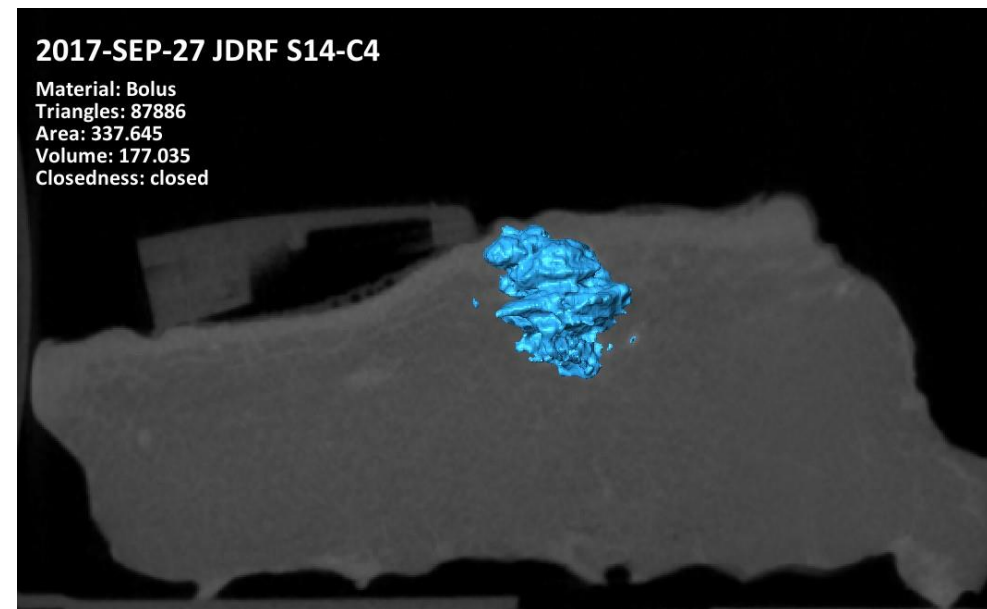

Note: kinked cannula

# 30°, Swine S14, 6 Days

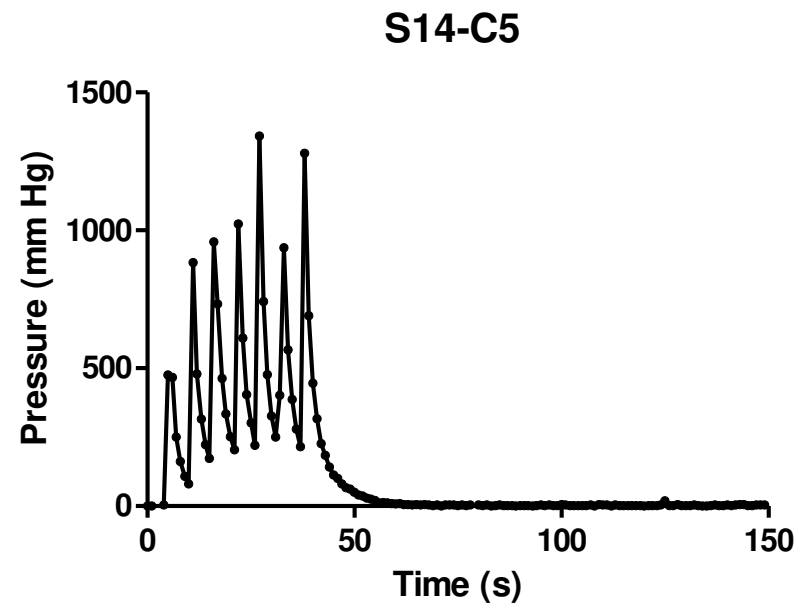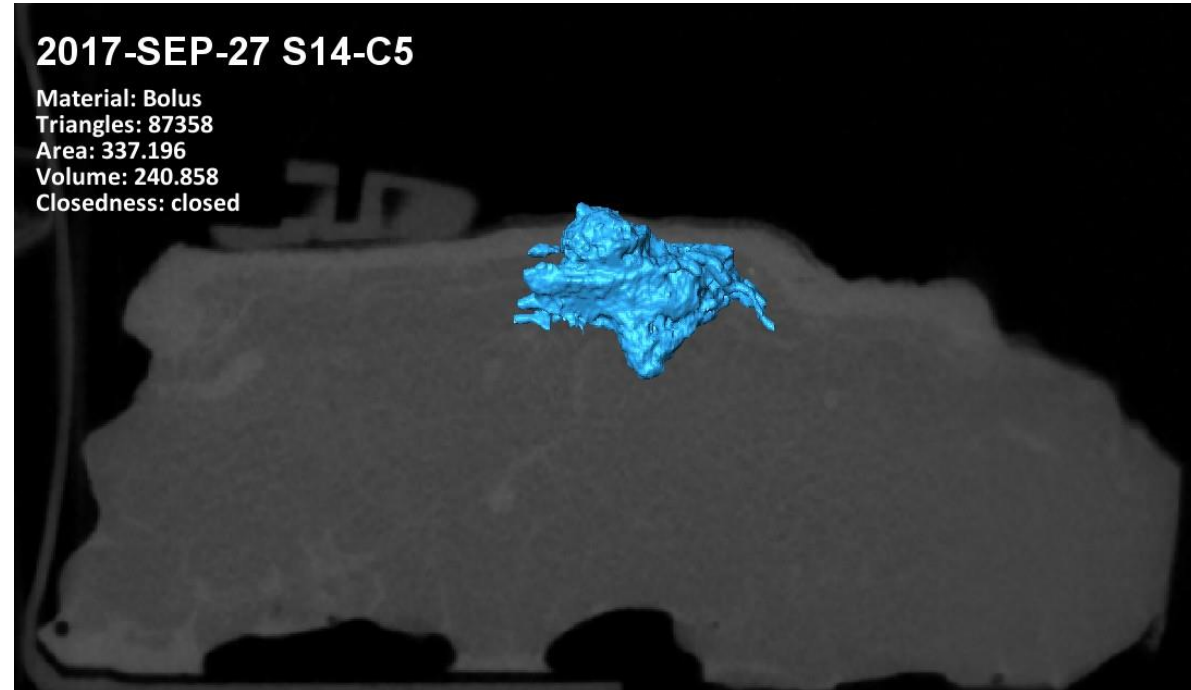



# 30°, Swine S14, 4 Days

Note: kinked cannula

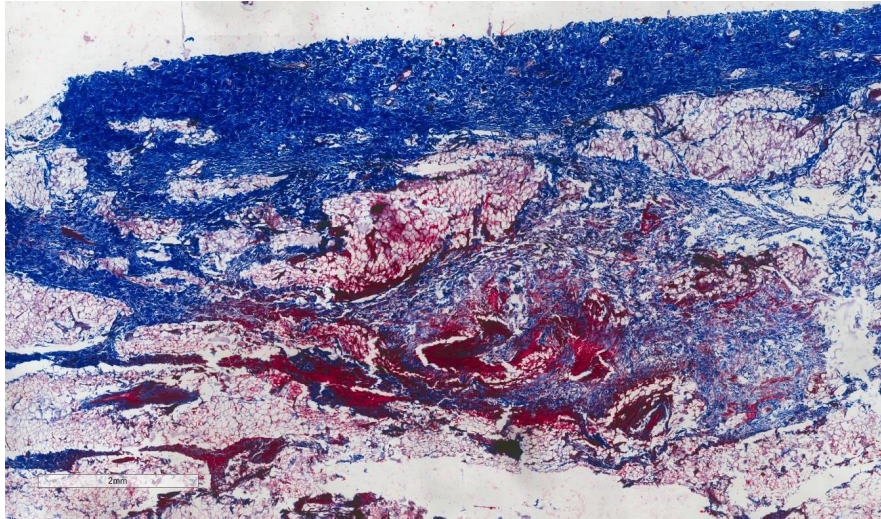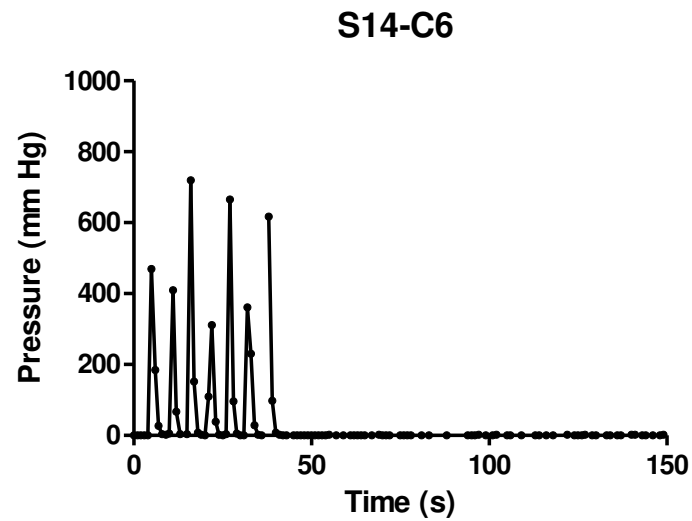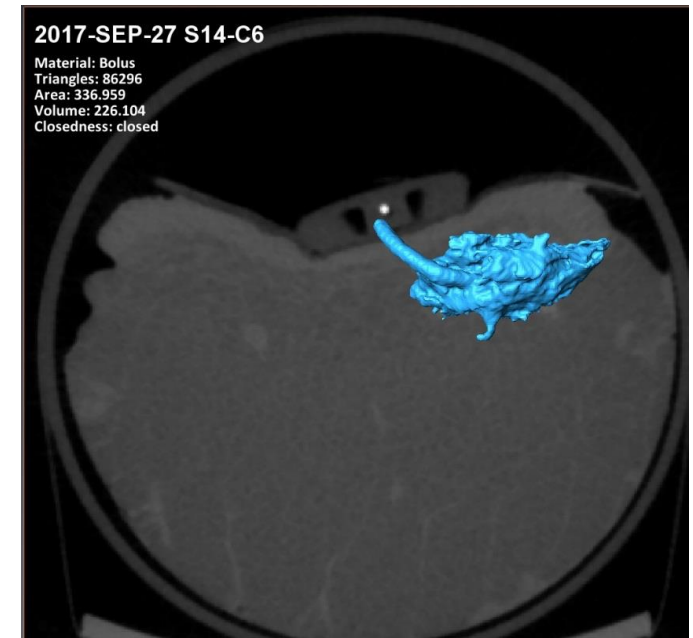

# 30°, Swine S14, 2 Days

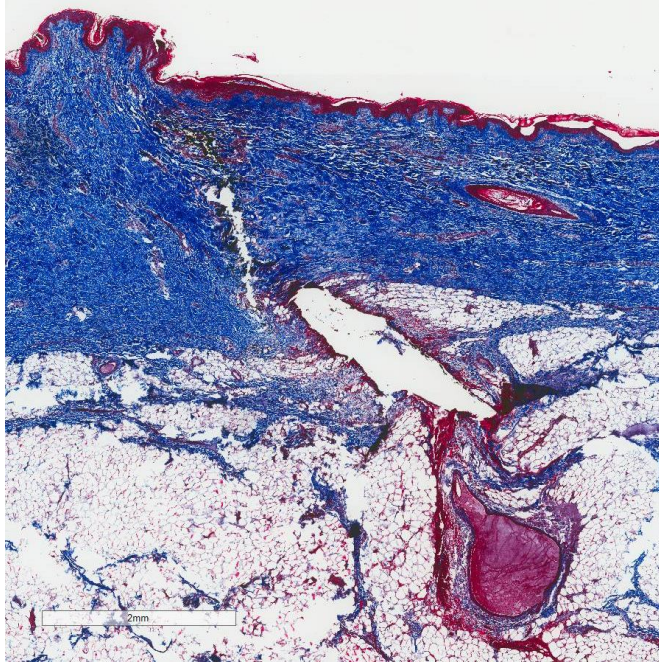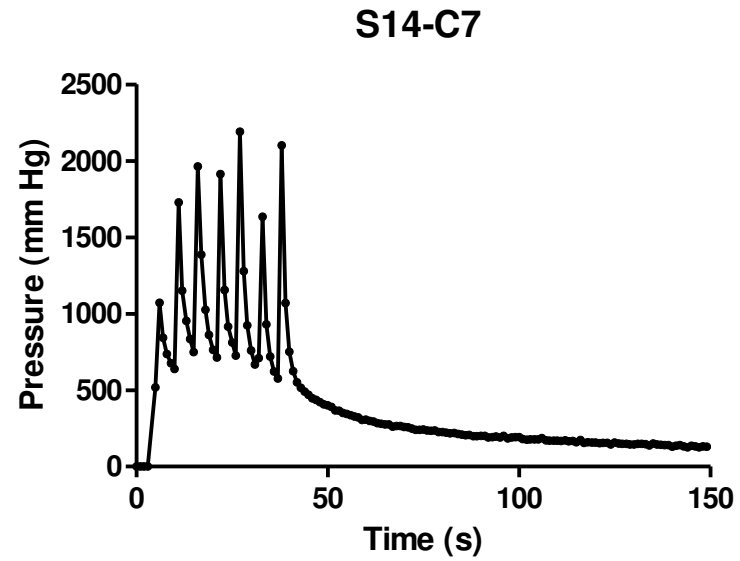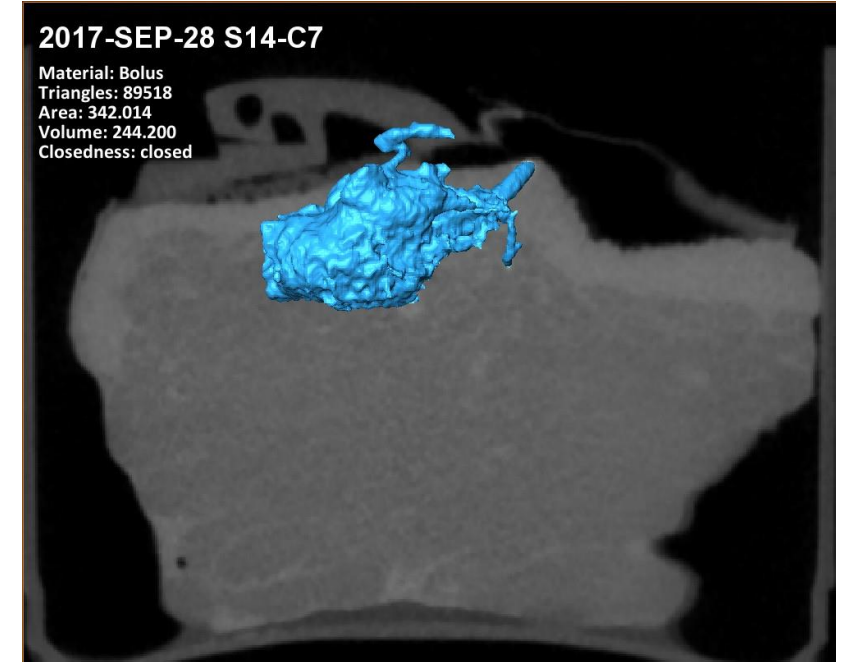

# 30°, Swine S14, Freshly Inserted (Day 1)

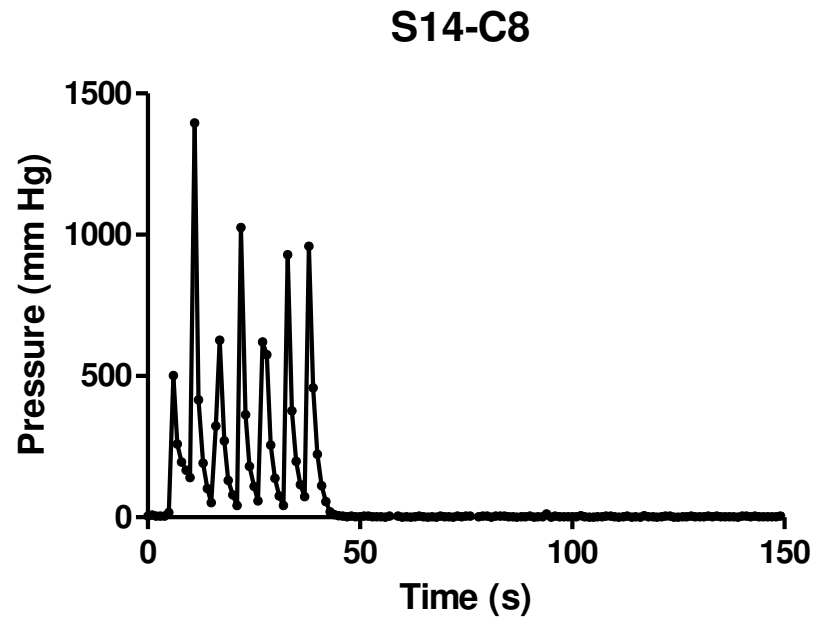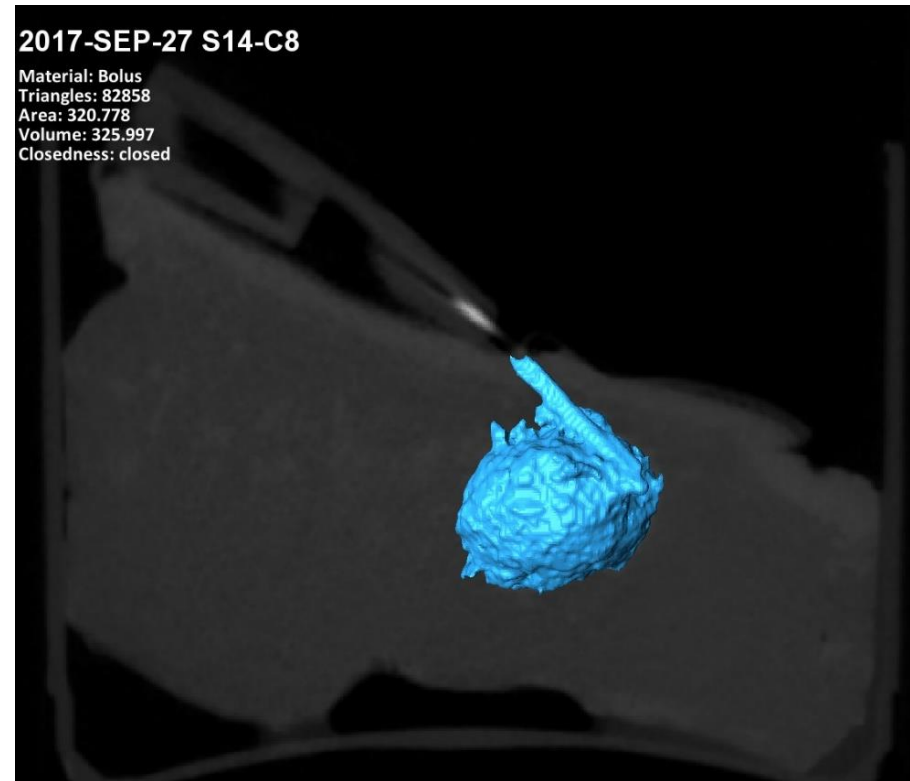

# 30°, Swine S15, 14 Days

Note: kinked cannula  
leak

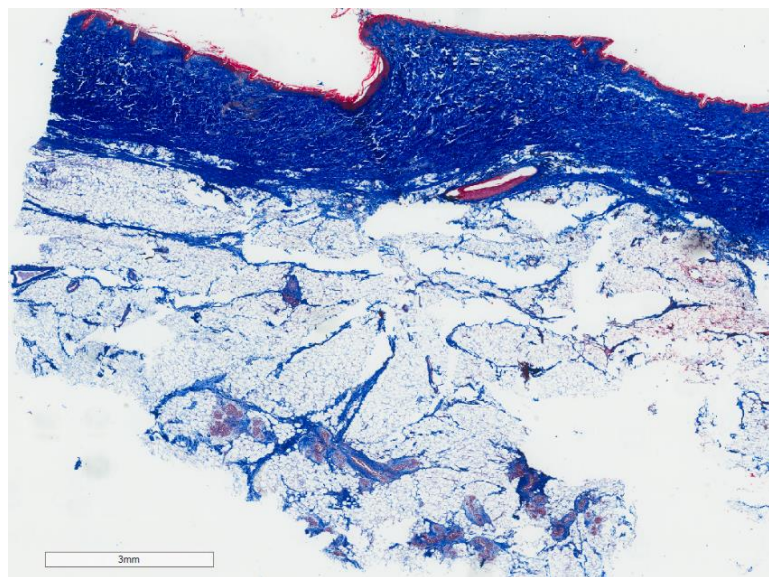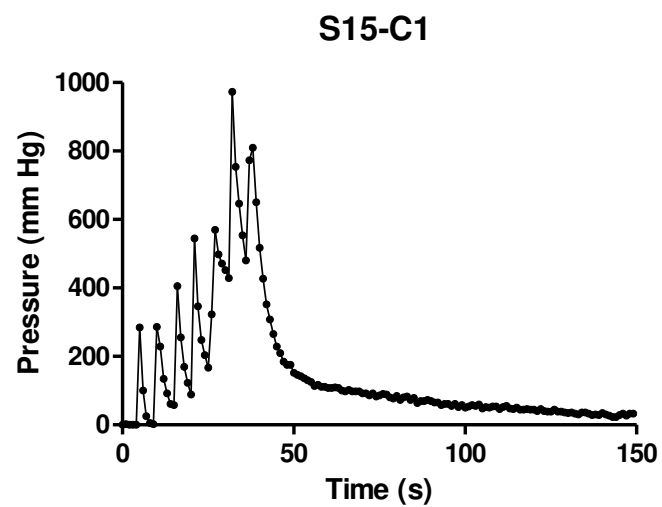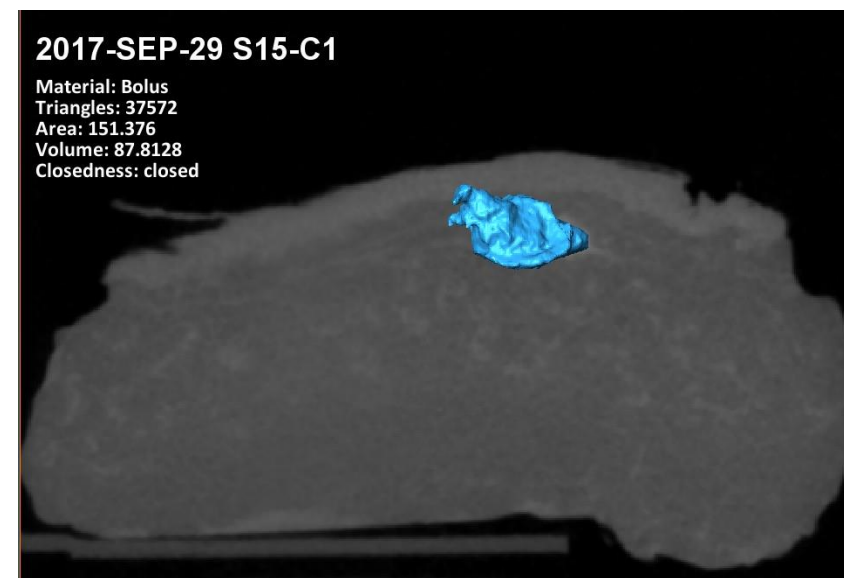

# 30°, Swine S15, 2 Days

Note: kinked cannula

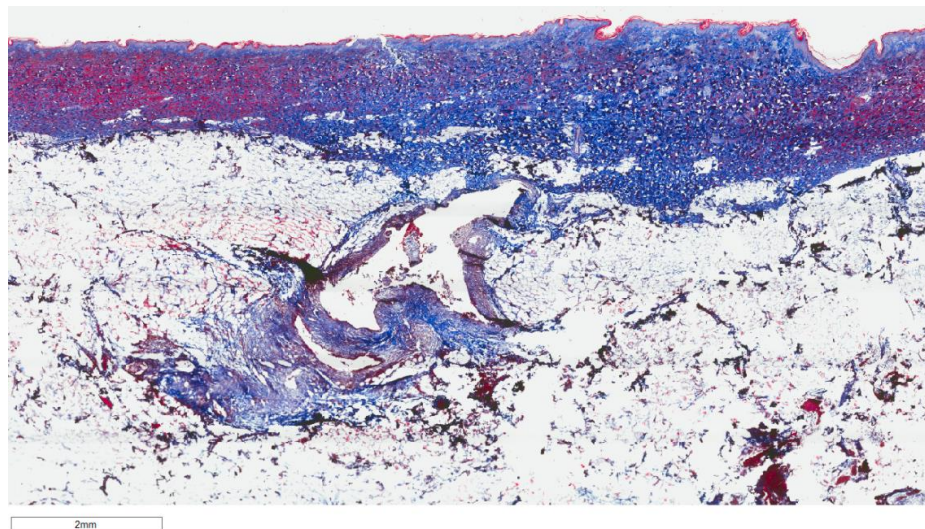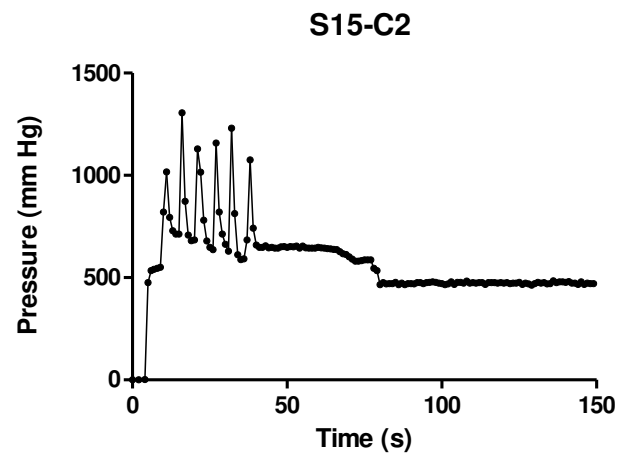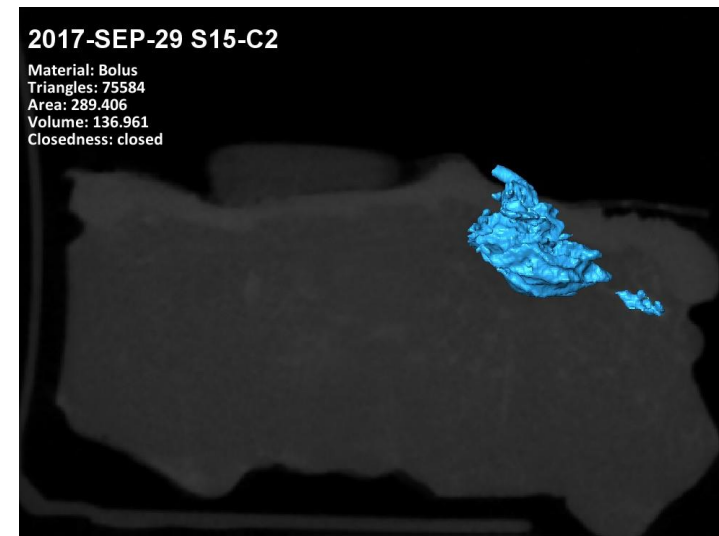

# 30°, Swine S15, 10 Days

Note: kinked cannula

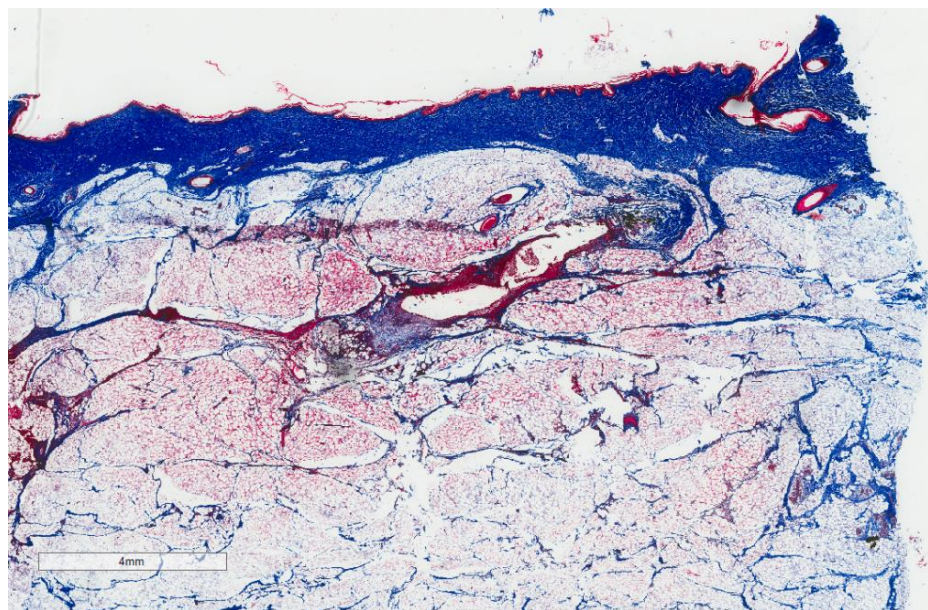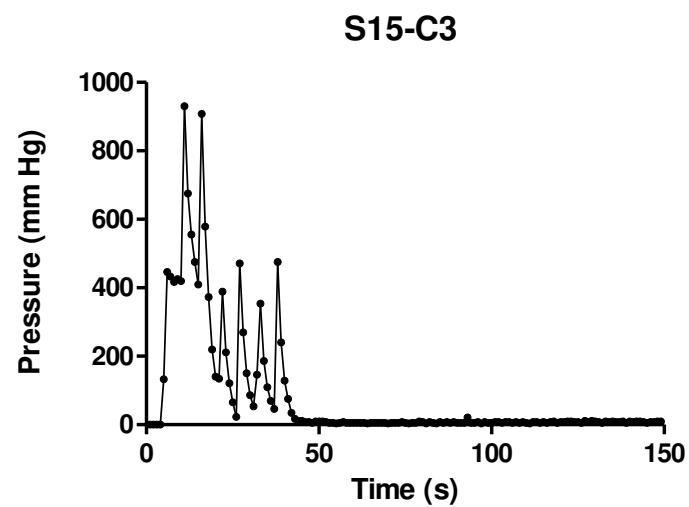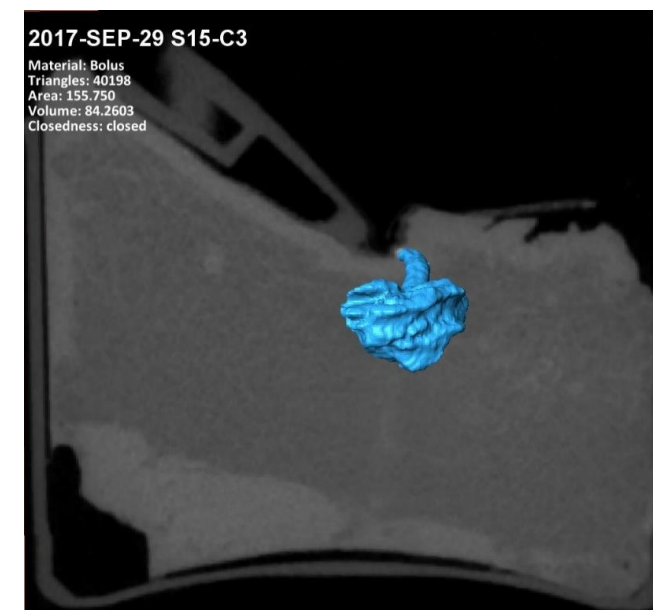

# 30°, Swine S15, 8 Days

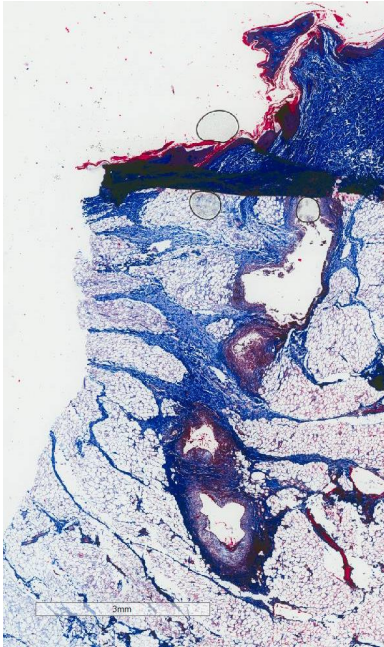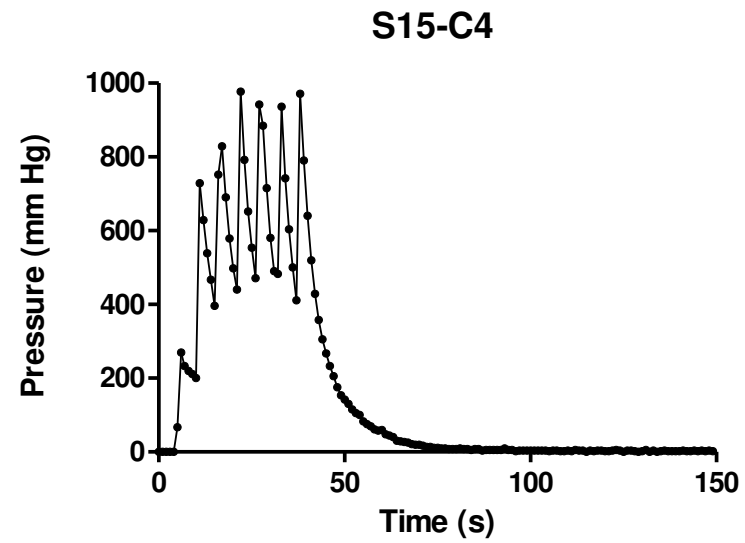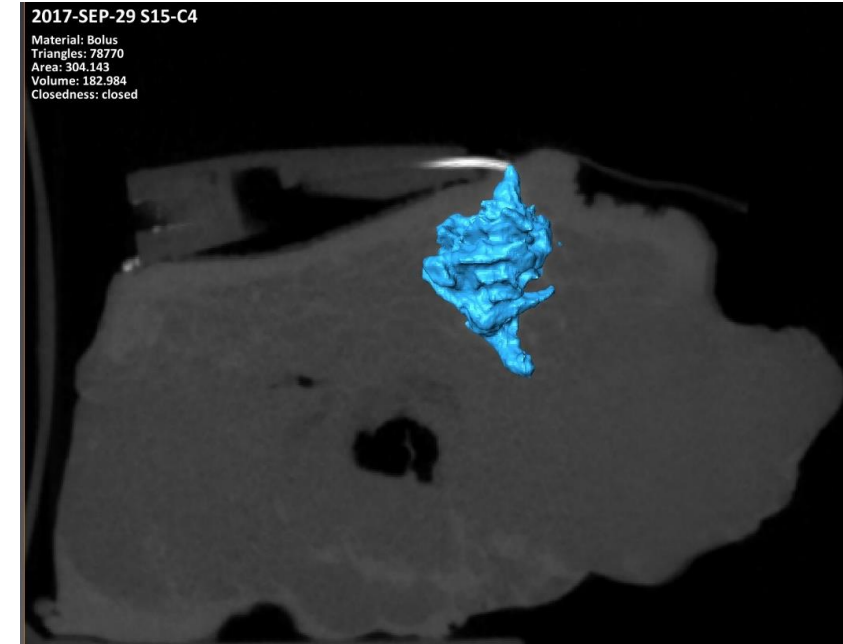

Note: kinked cannula

# 30°, Swine S15, 6 Days

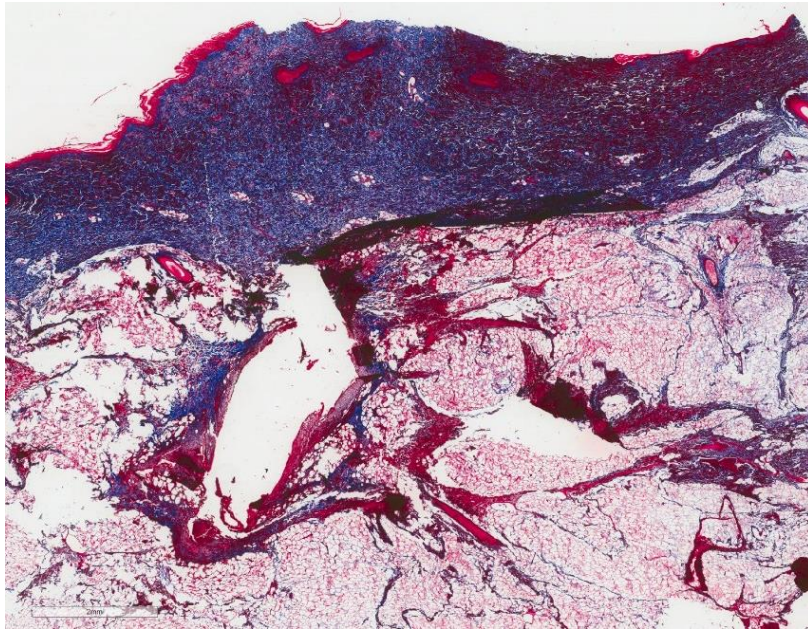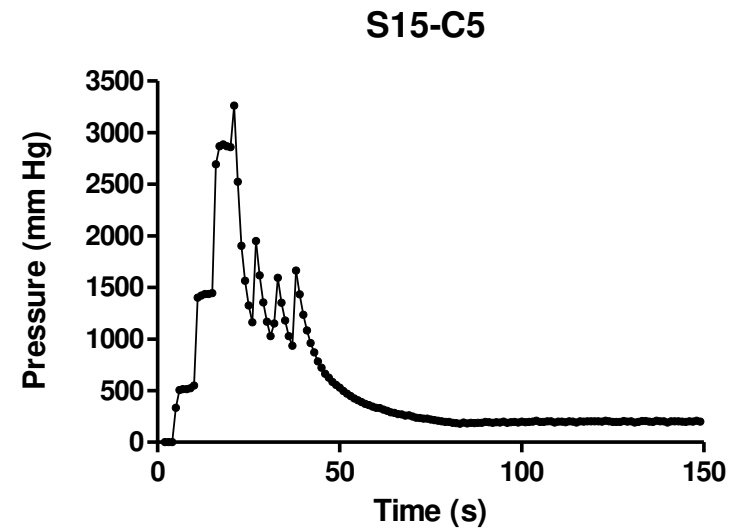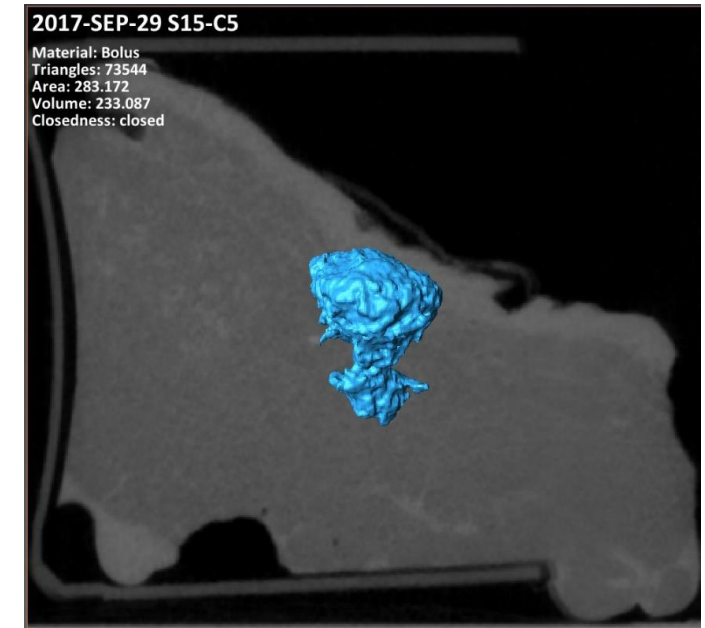



# 30°, Swine S15, 4 Days

Note: kinked cannula

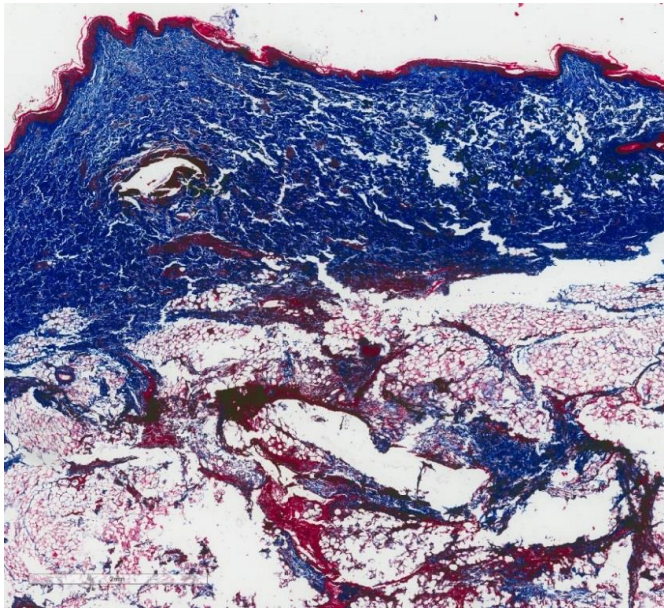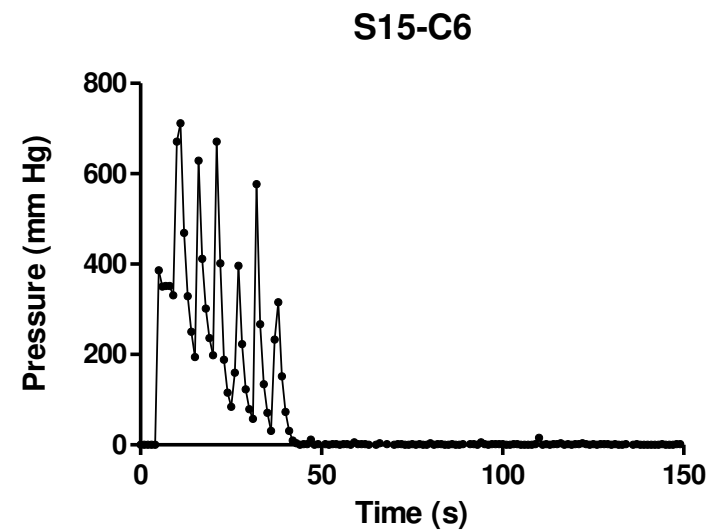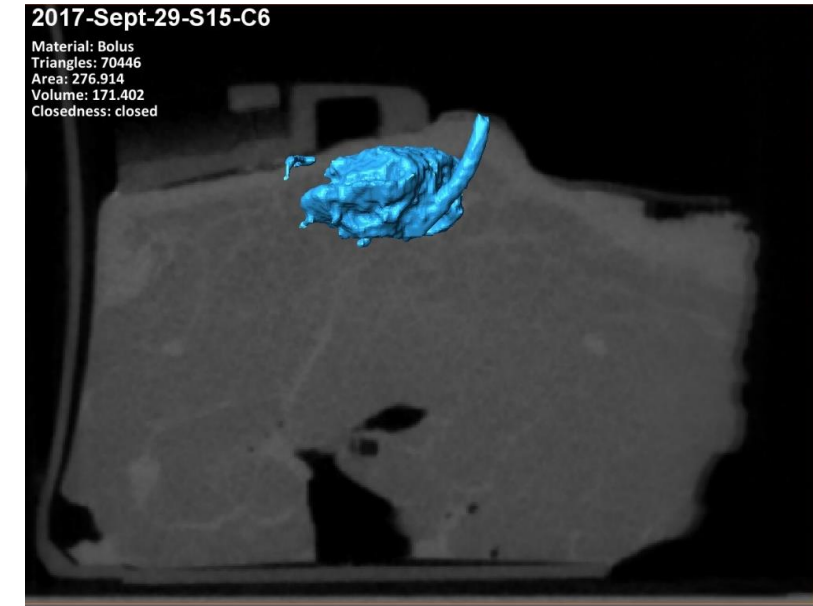

# 30°, Swine S15, 2 Days

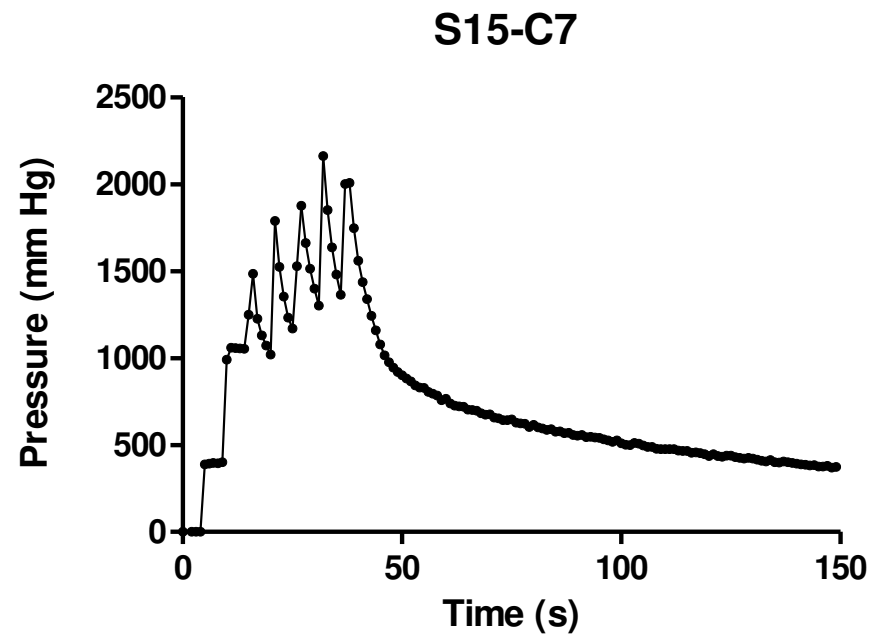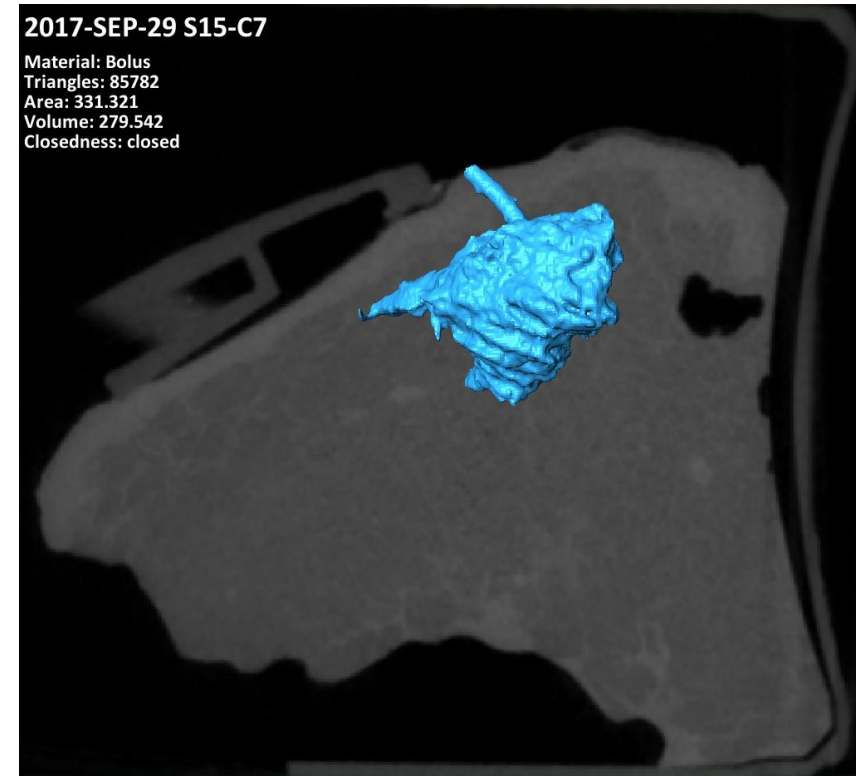

# 30°, Swine S15, Freshly Inserted (Day 1)

*Note:* kinked cannula

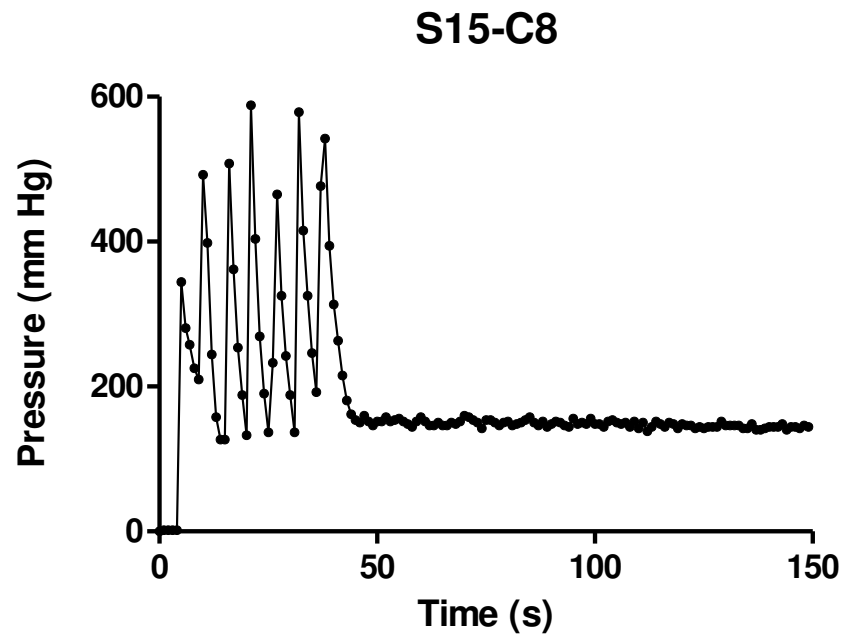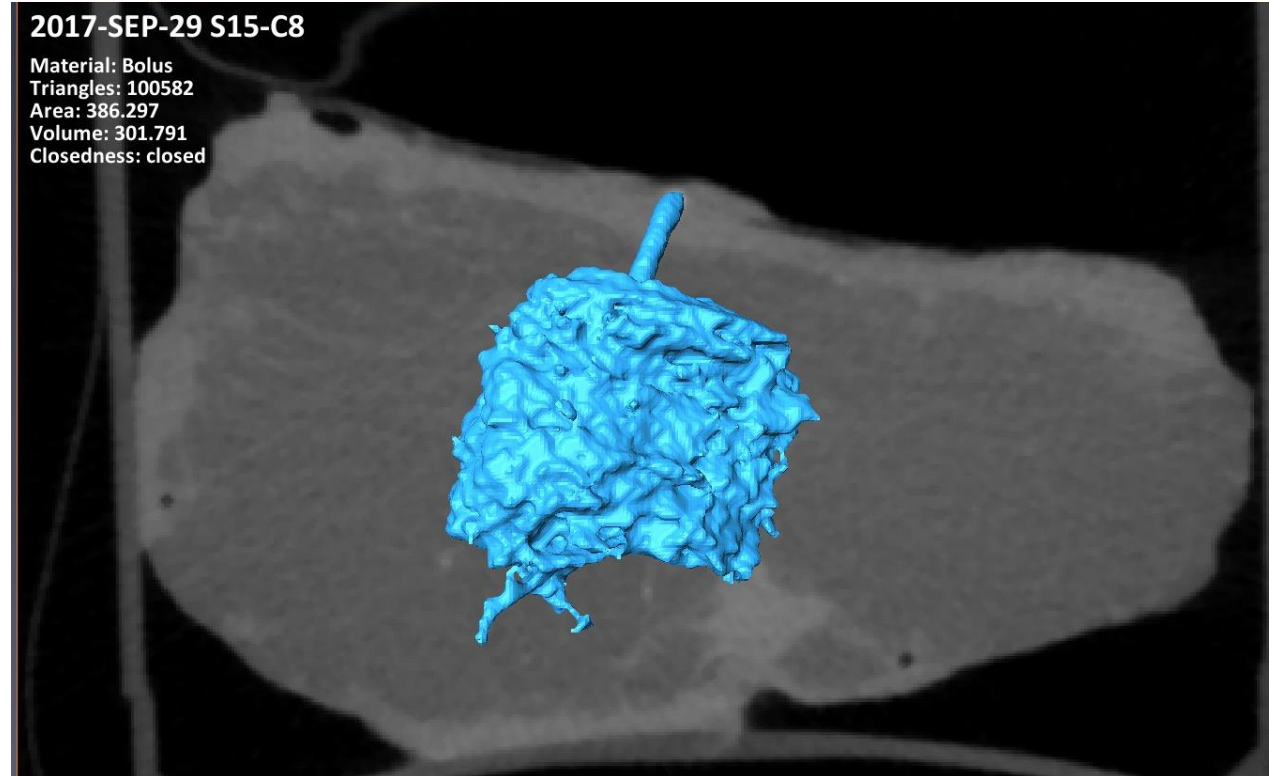

# 30°, Swine S16, 14 Days

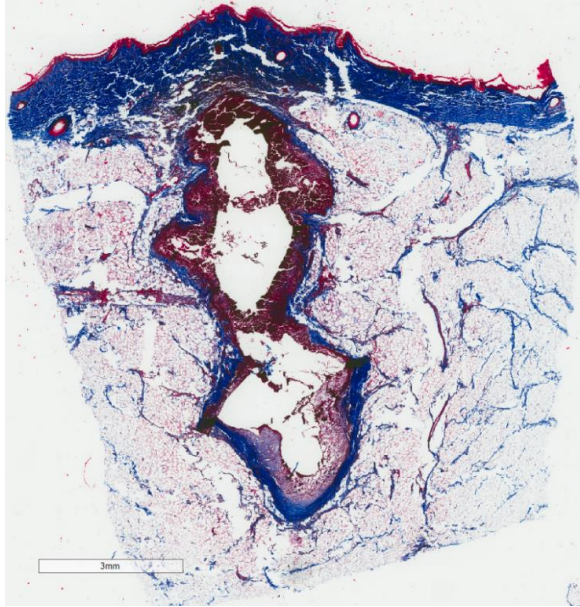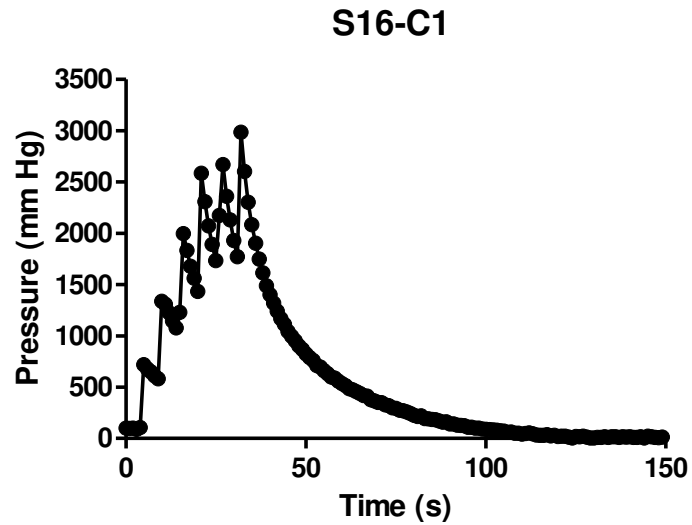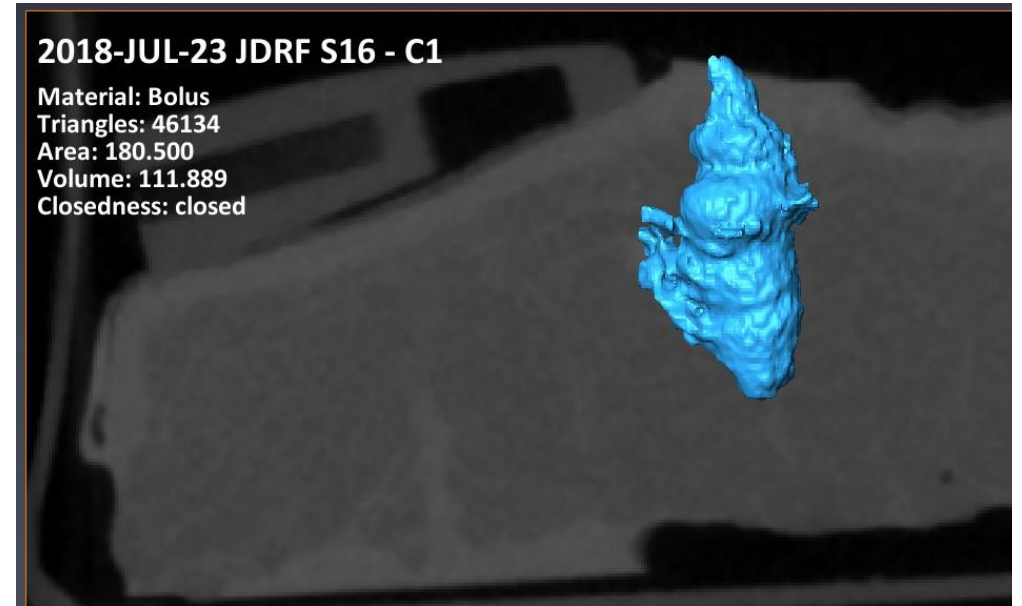

# 30°, Swine S16, 2 Days

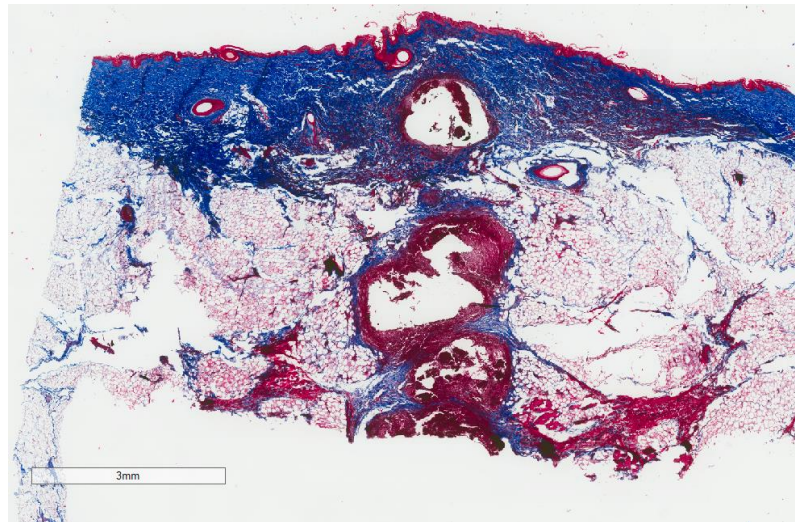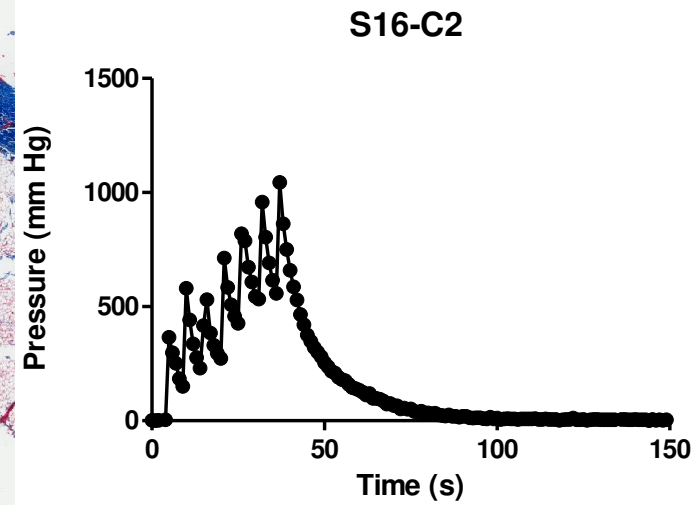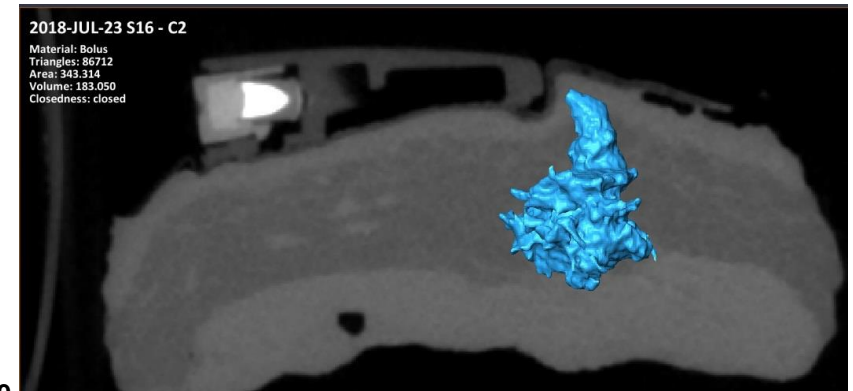

# 30°, Swine S16, 10 Days

Note: kinked cannula

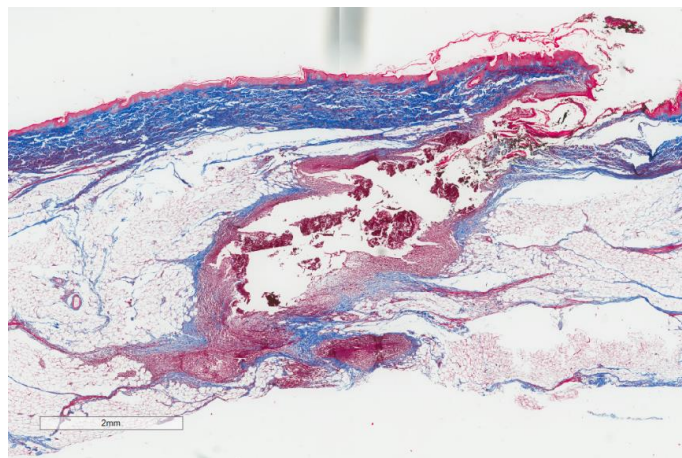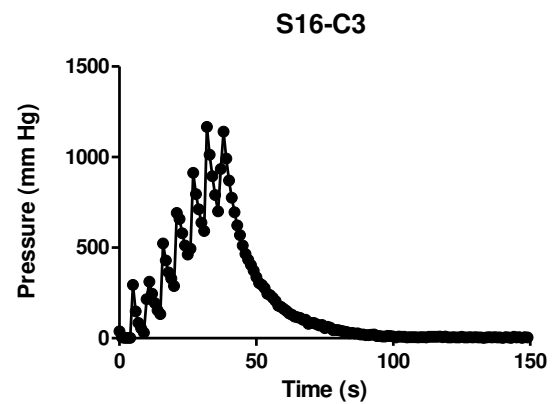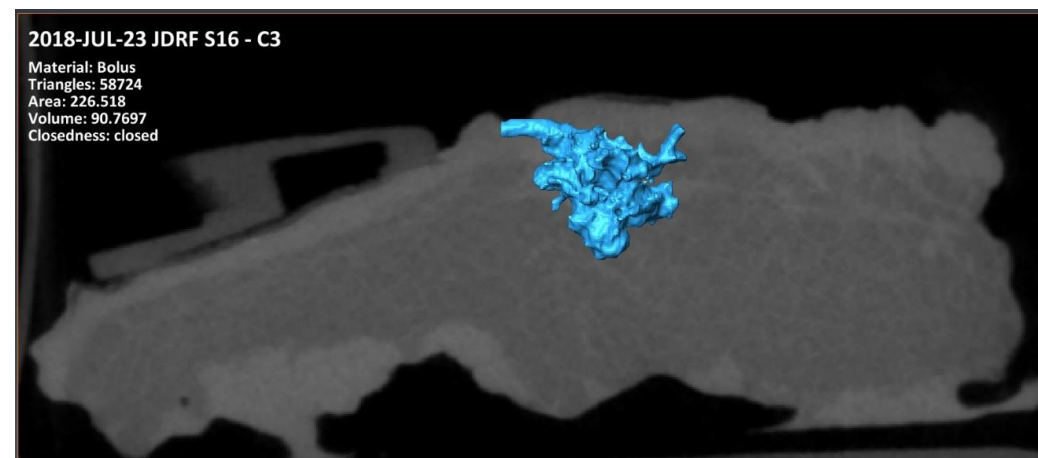

# 30°, Swine S16, 8 Days

Note: leak

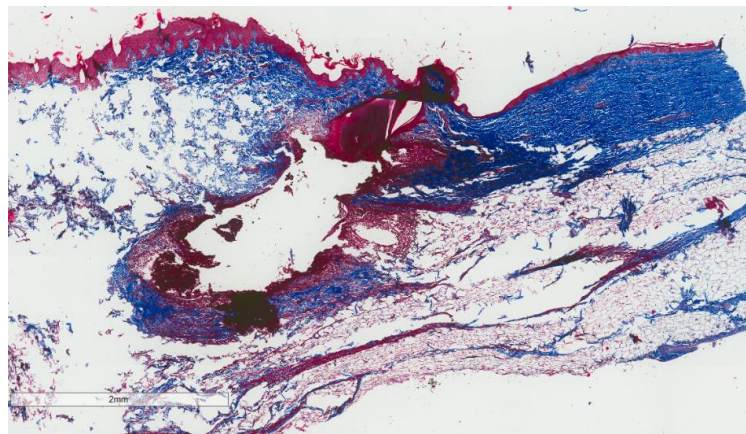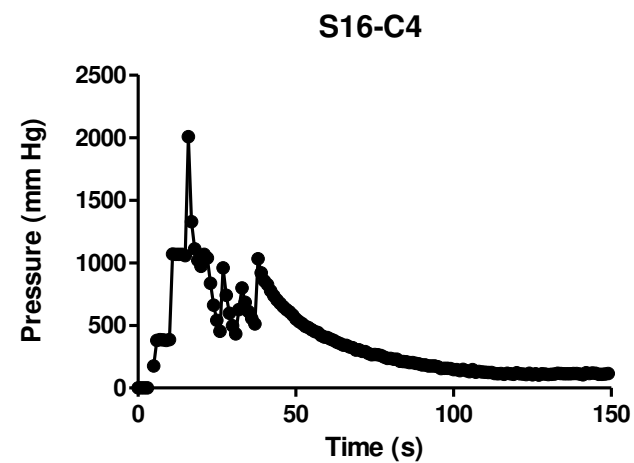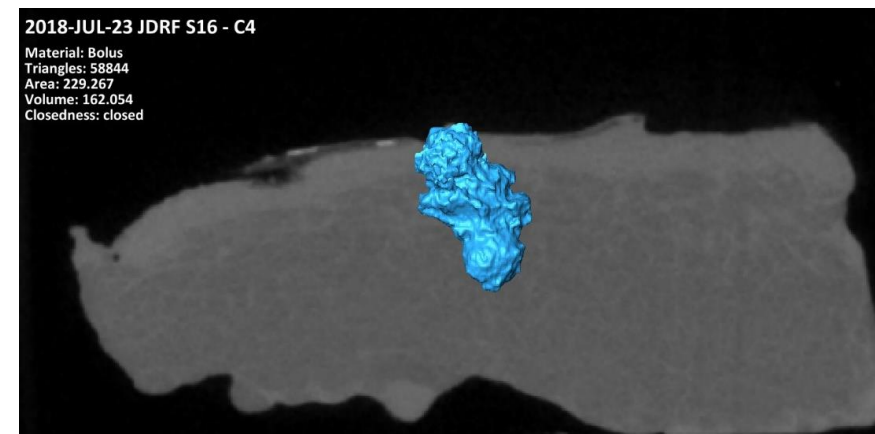

# 30°, Swine S16, 6 Days

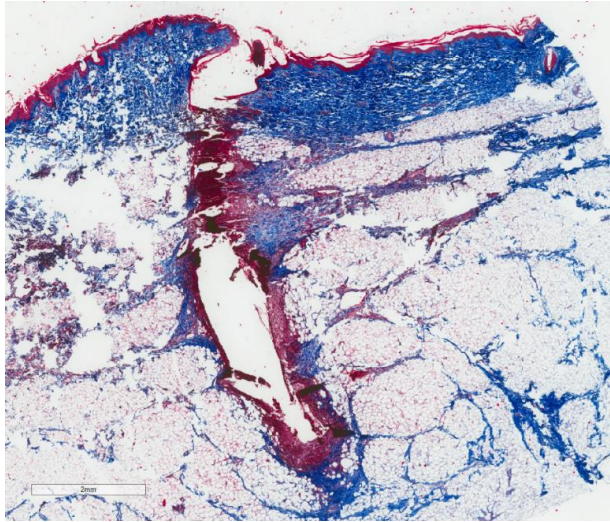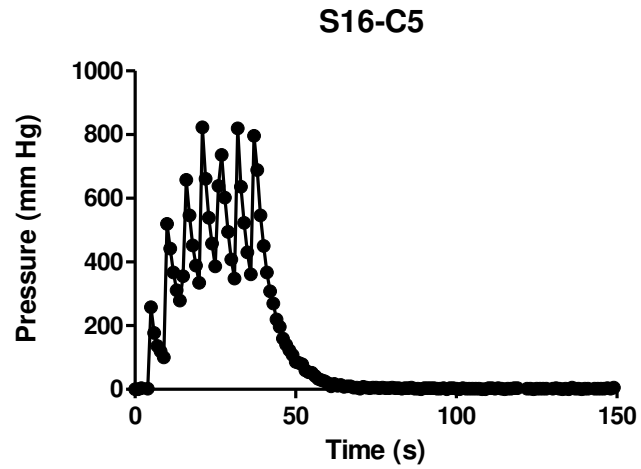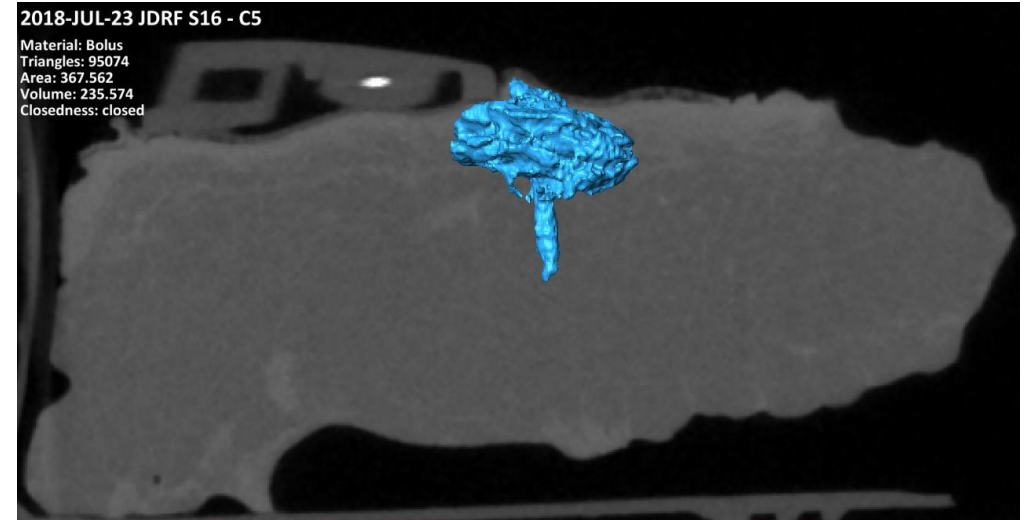



# 30°, Swine S16, 4 Days

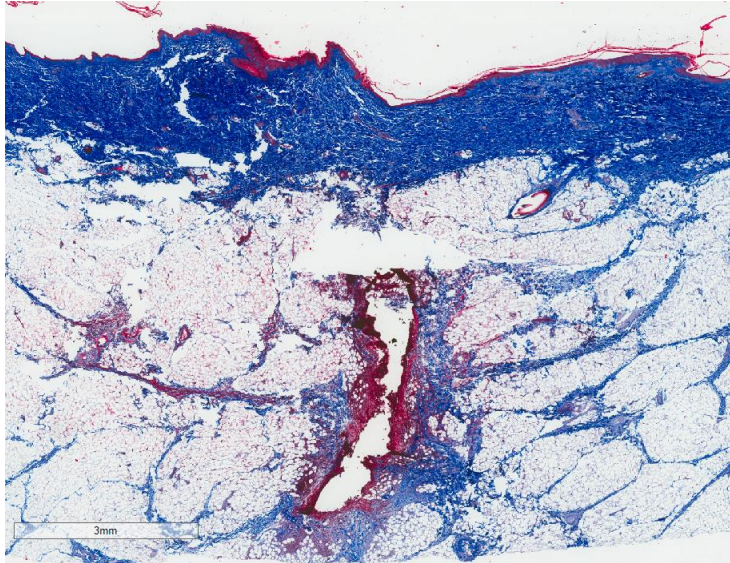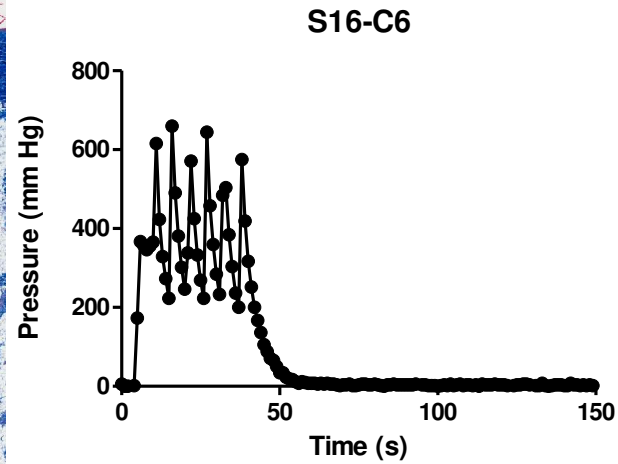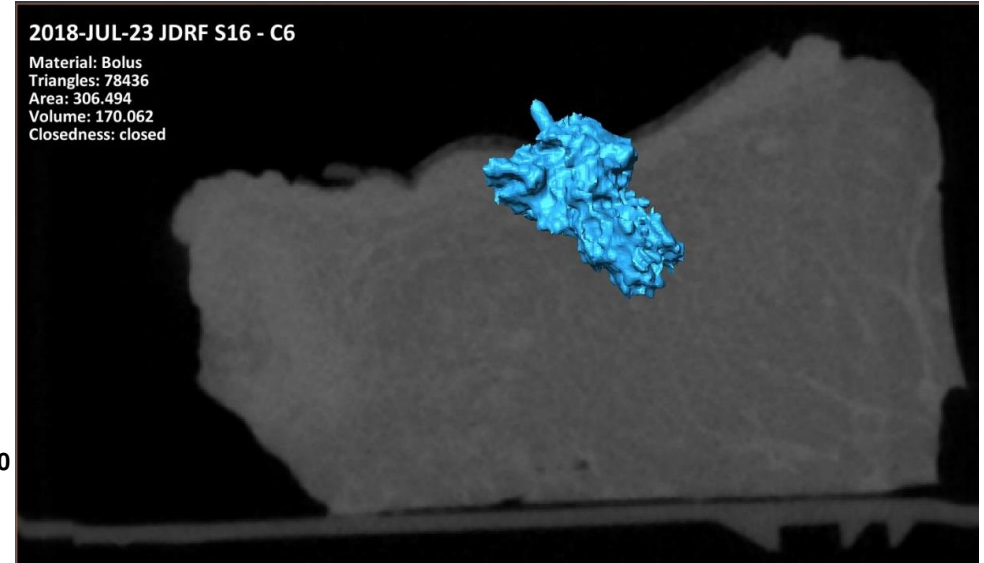

# 30°, Swine S16, 2 Days

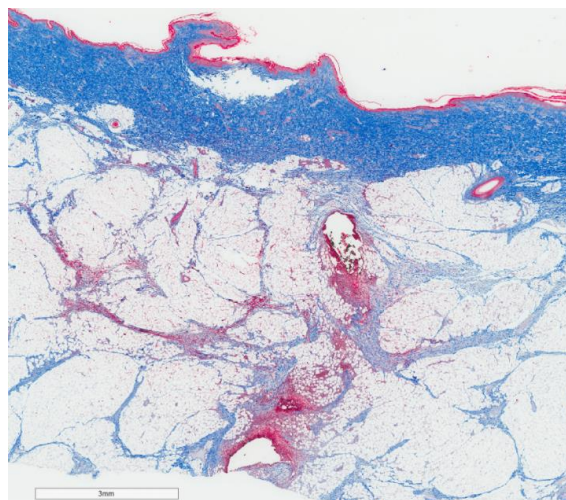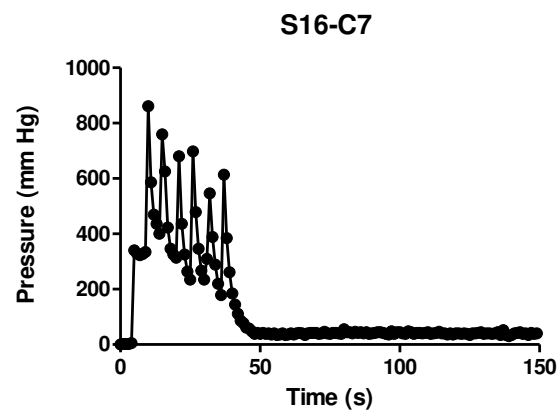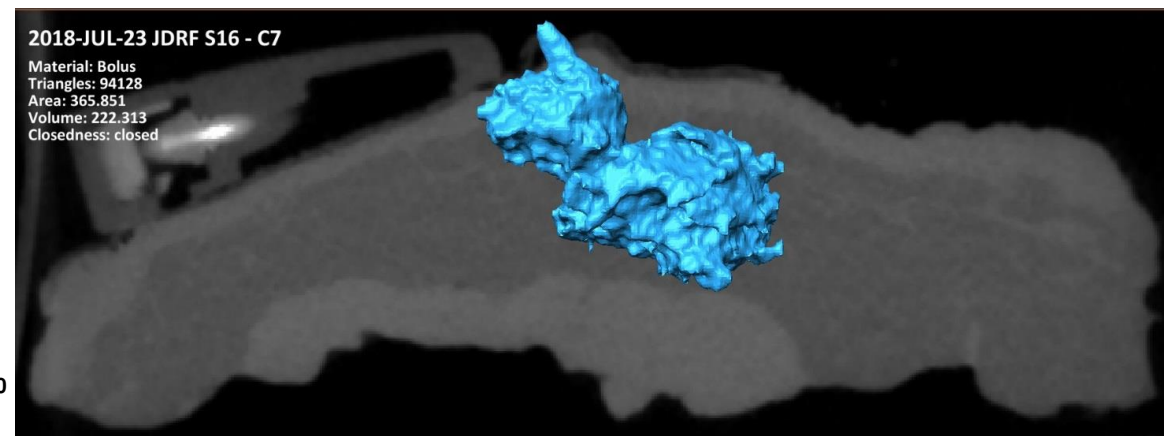

Note: kinked cannula

# 30°, Swine S16, 0 Days

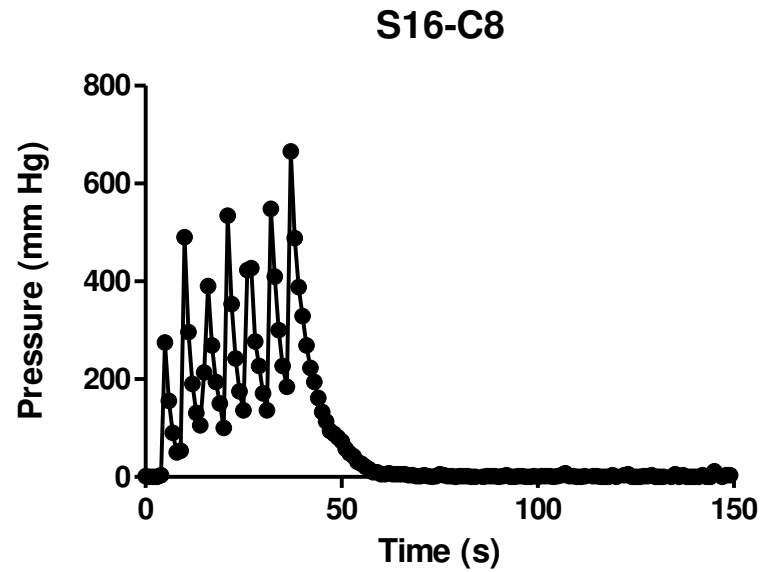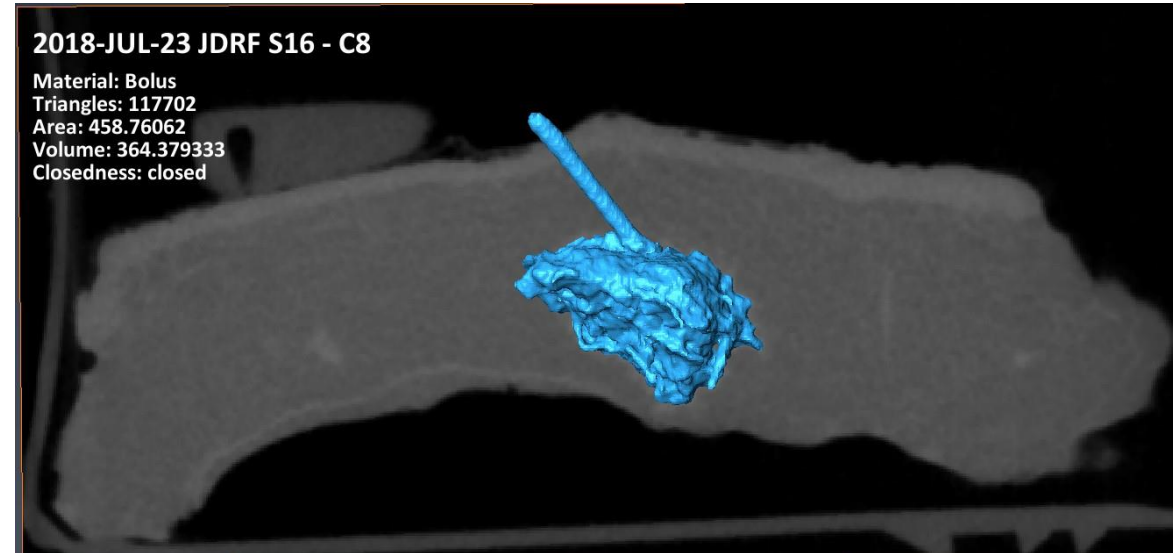

# 30°, Swine S17, 14 Days

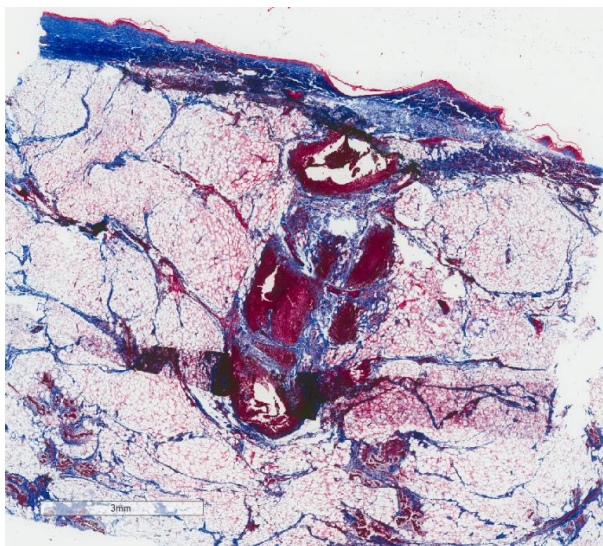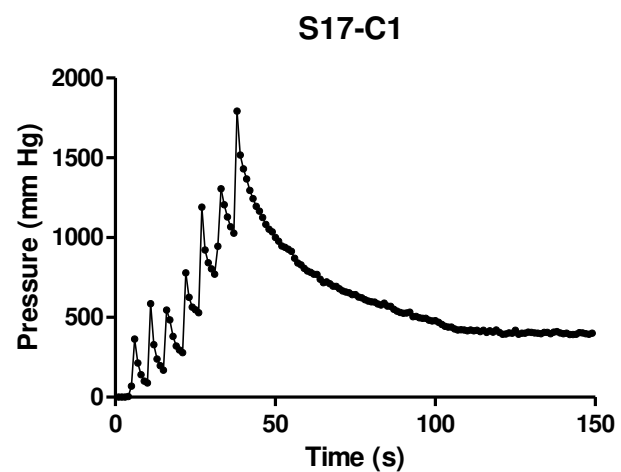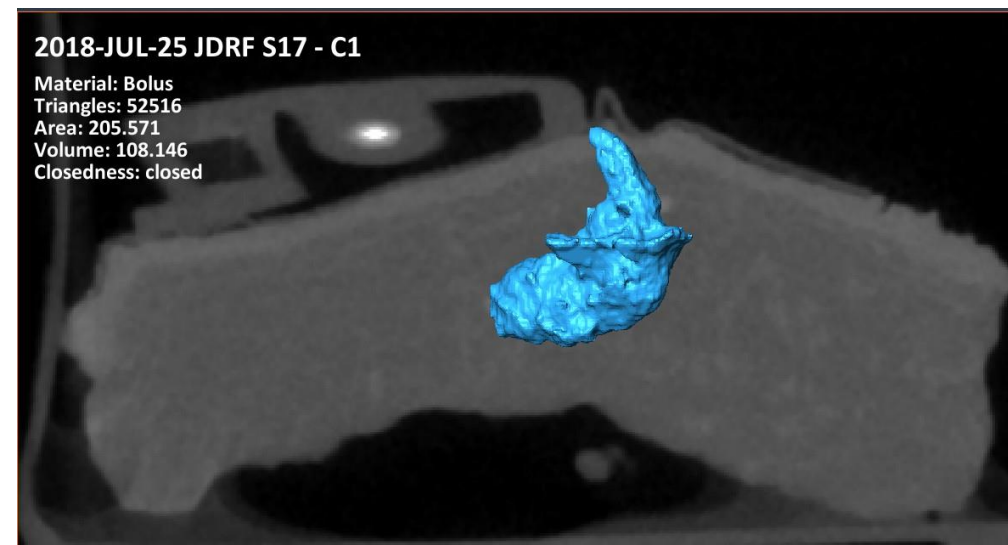

Note: kinked cannula

# 30°, Swine S17, 12 Days

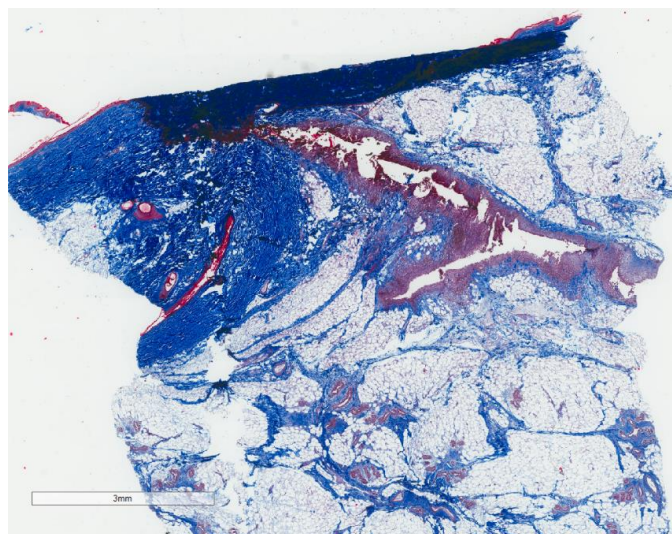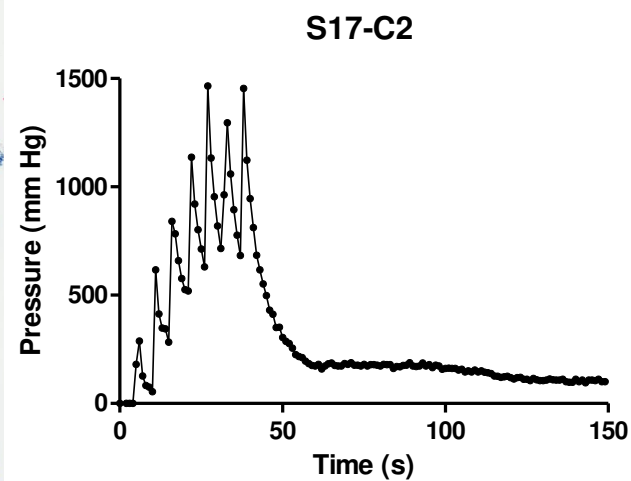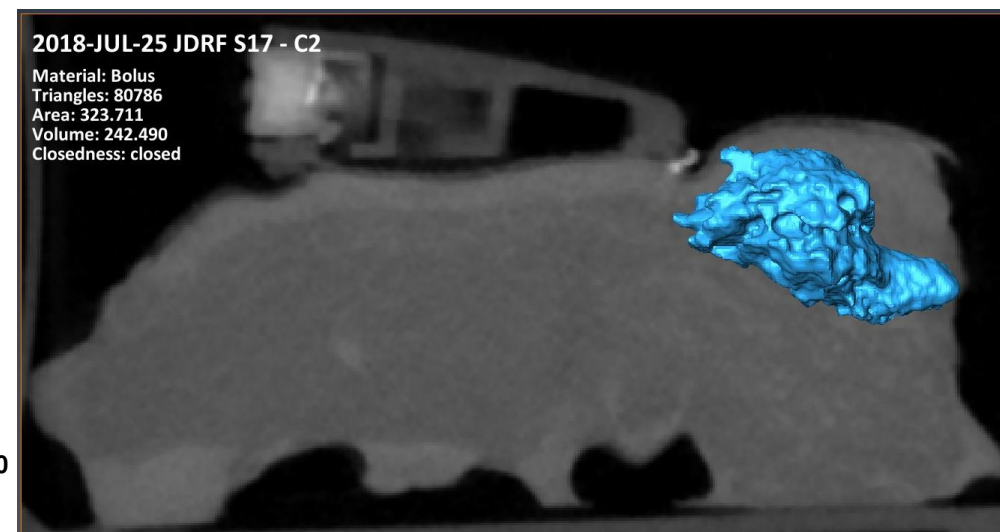

# 30°, Swine S17, 10 Days

Note: kinked cannula

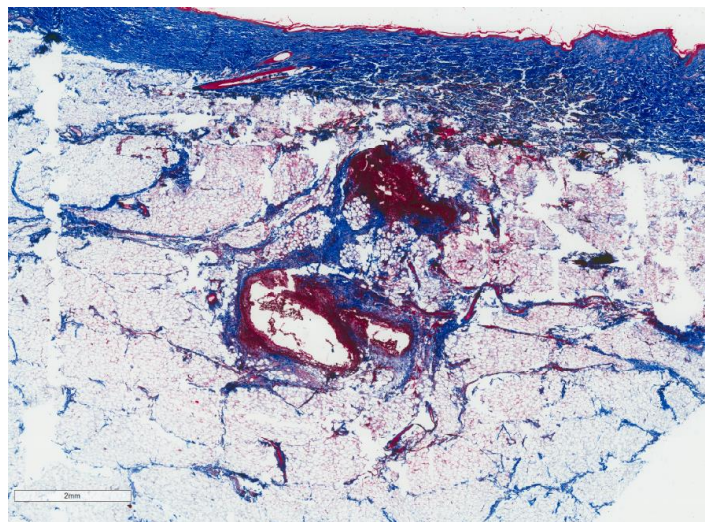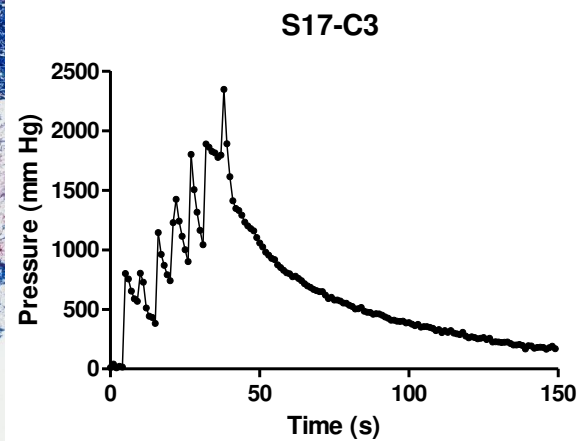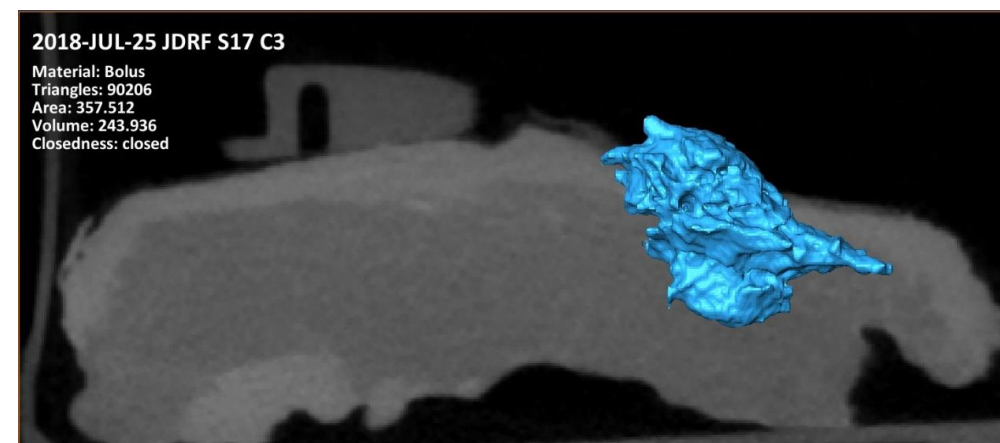

# 30°, Swine S17, 8 Days

Note: kinked cannula

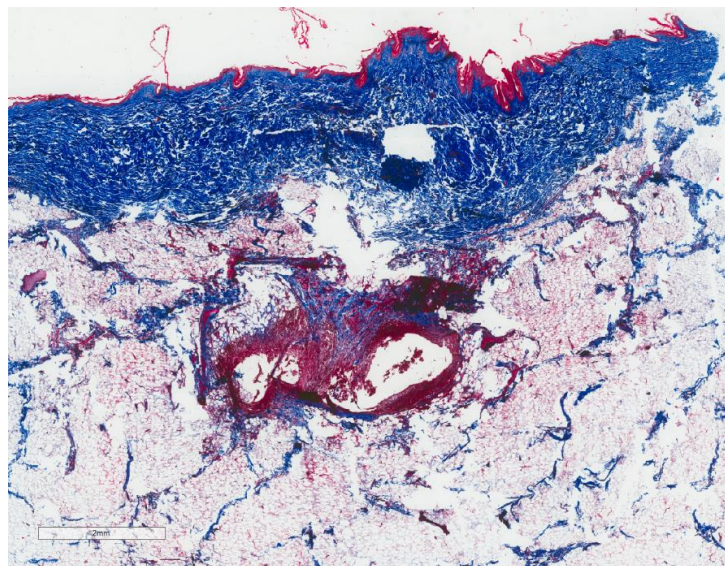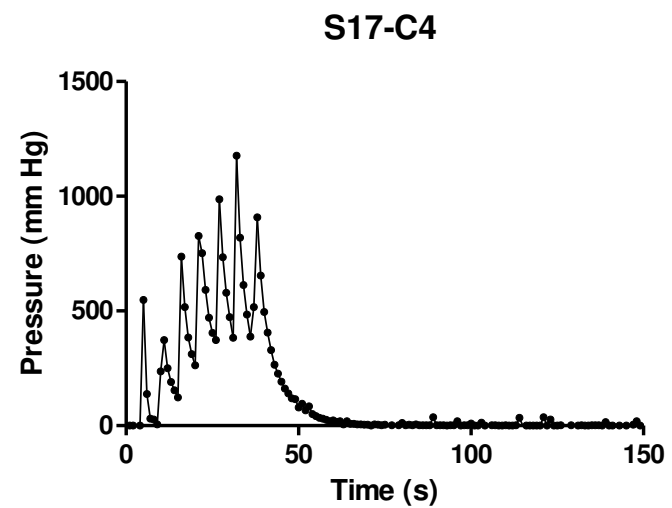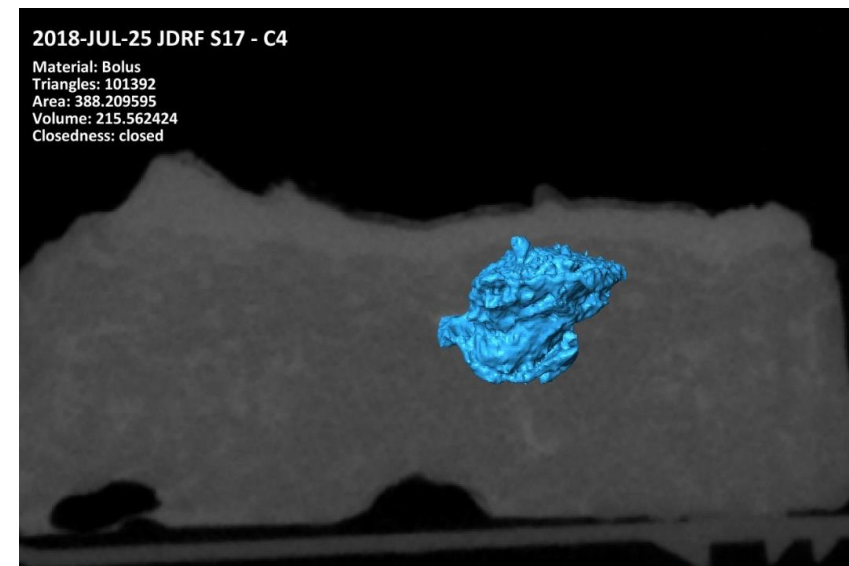

# 30°, Swine S17, 6 Days

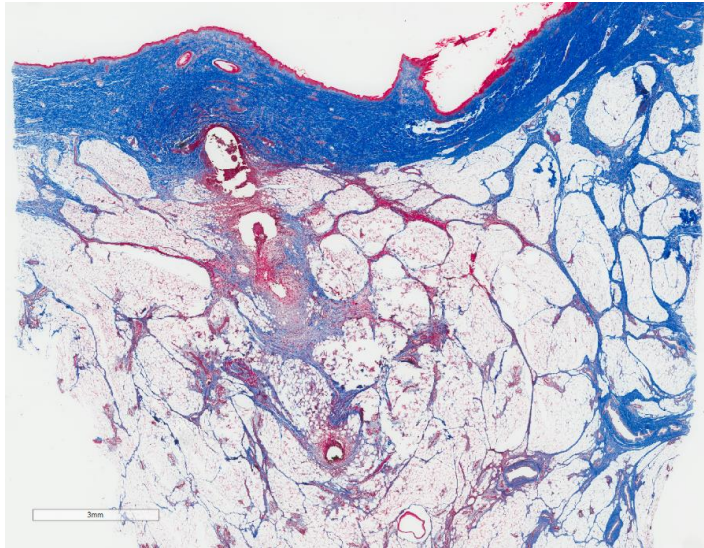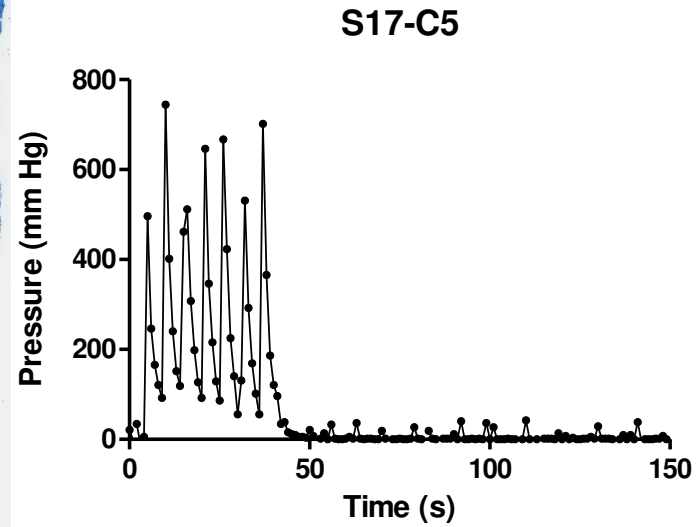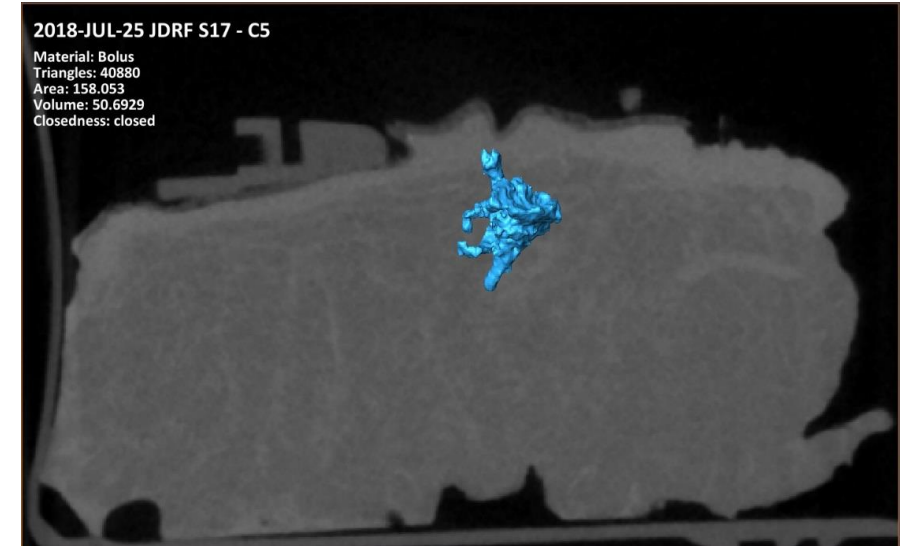

Note: kinked cannula  
<70  $\mu\text{L}$  in tissue (50.7  $\mu\text{L}$ )



30°, Swine S17, 4 Days

*Removed, no data*

# 30°, Swine S17, 2 Days

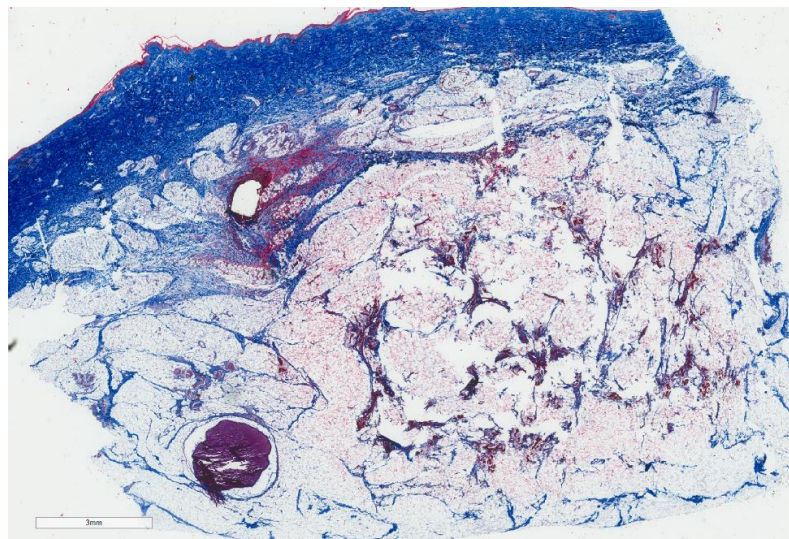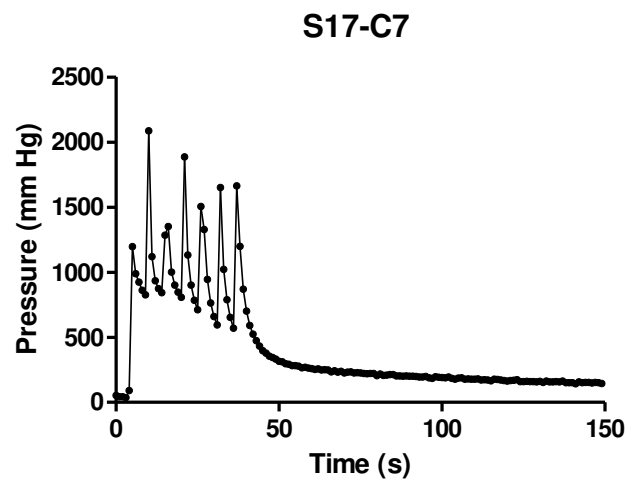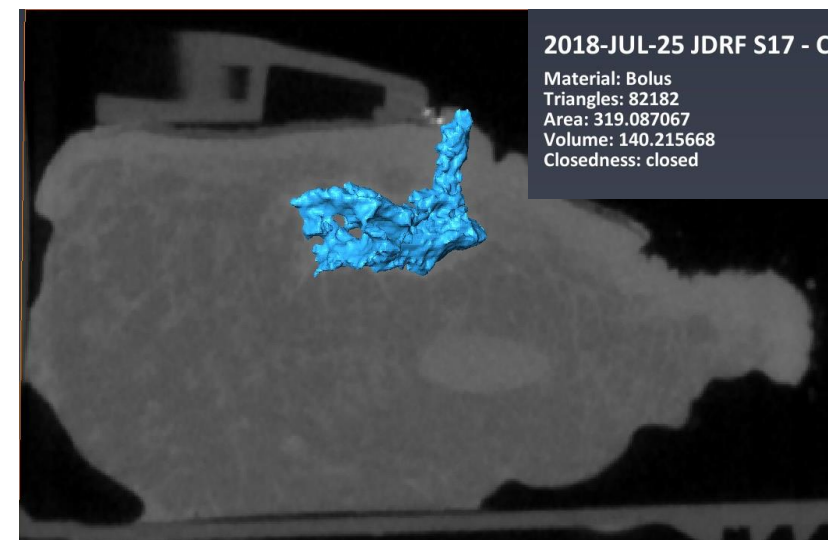

Note: kinked cannula  
pump occlusion alarm

# 30°, Swine S17, Freshly Inserted (Day 1)

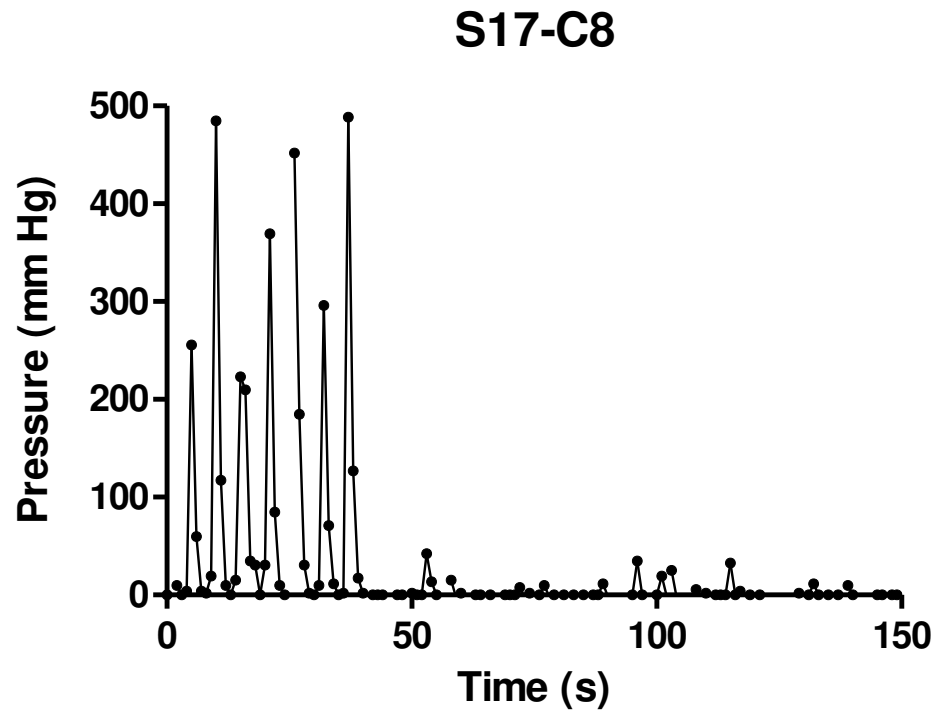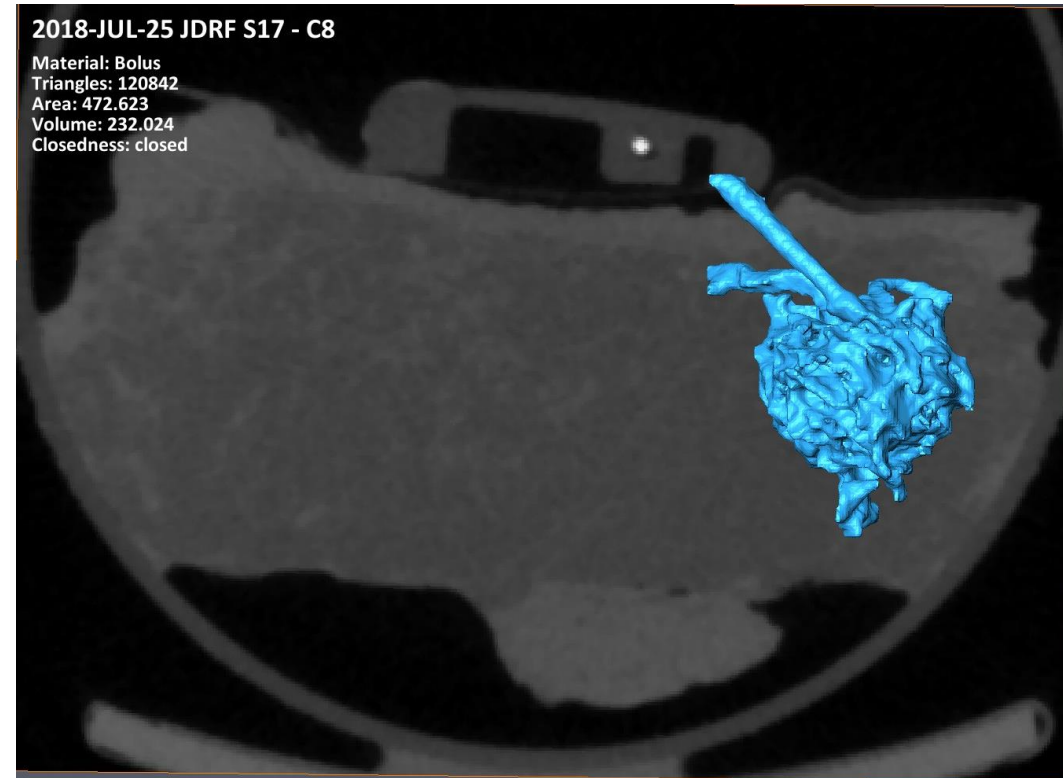

# 30°, Swine S18, 14 Days

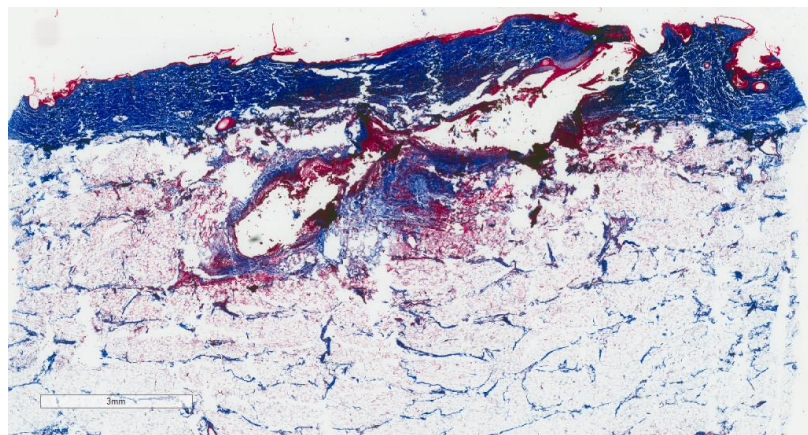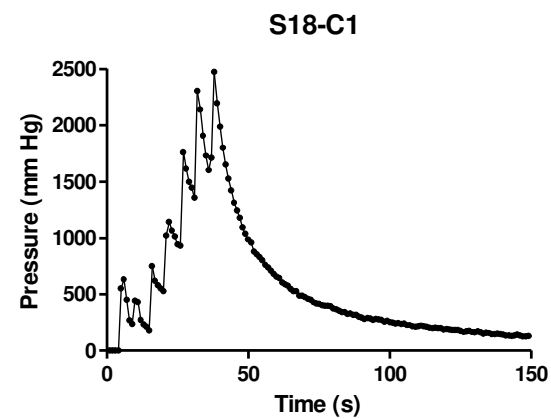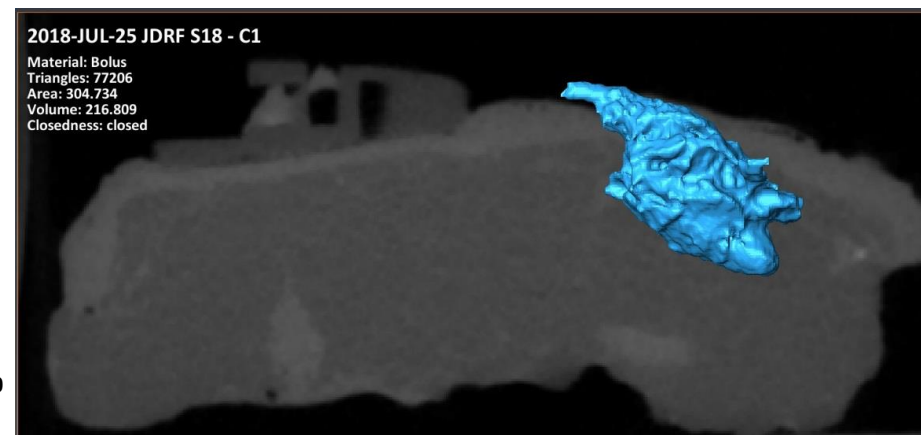

# 30°, Swine S18, 12 Days

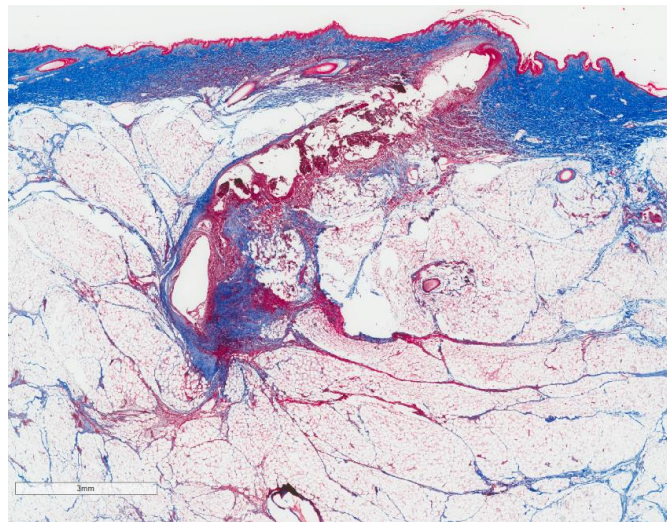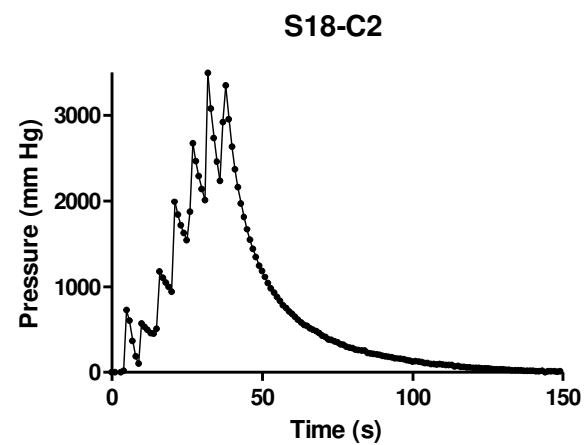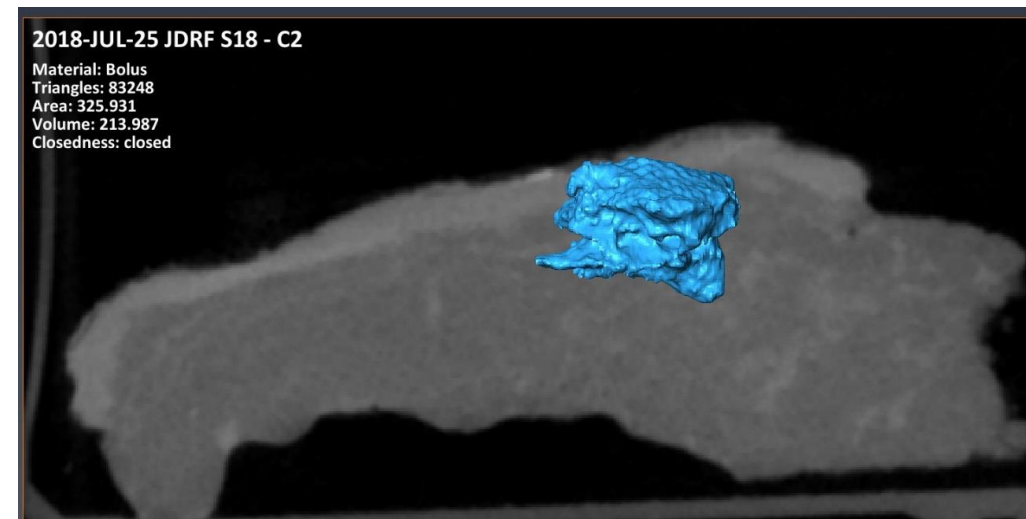

Note: kinked cannula

# 30°, Swine S18, 10 Days

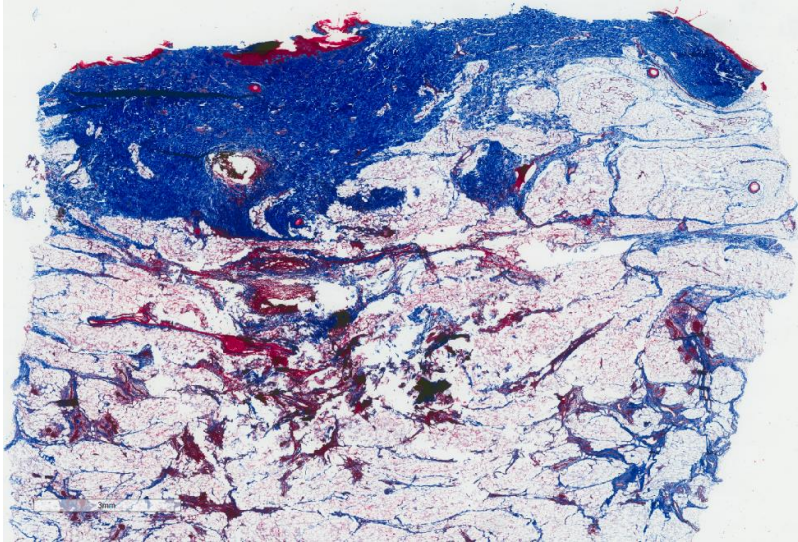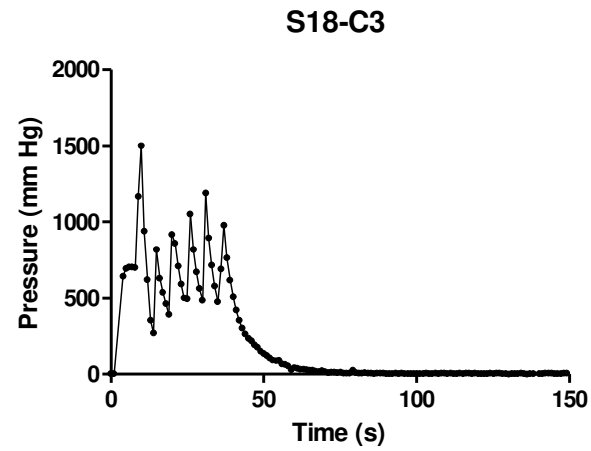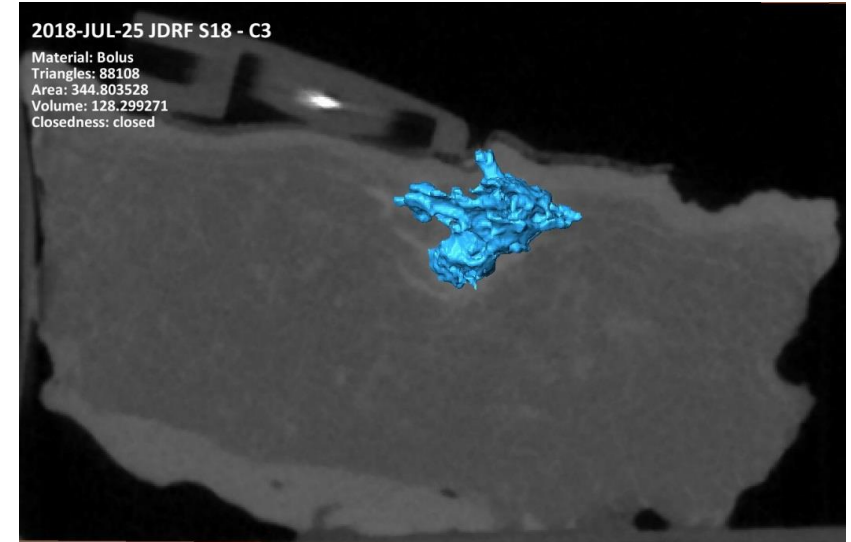

# 30°, Swine S18, 8 Days

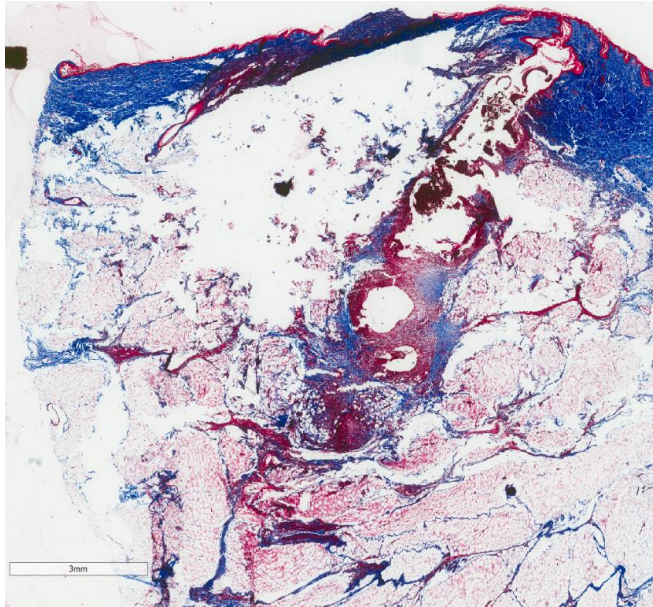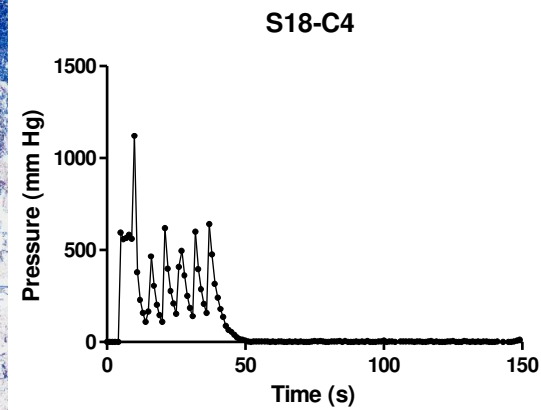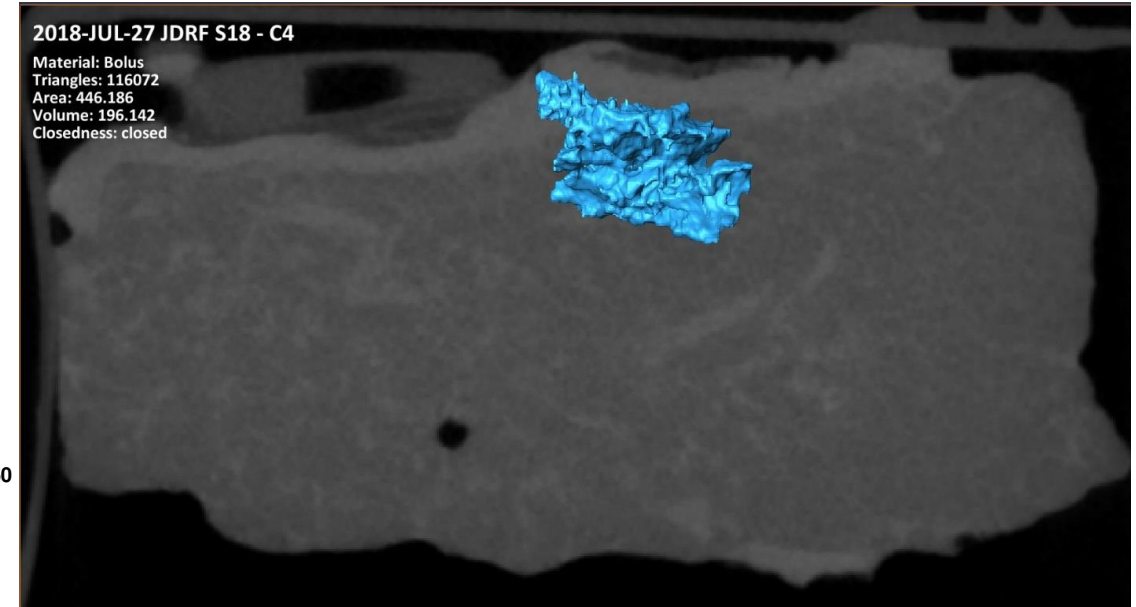

Note: kinked cannula

# 30°, Swine S18, 6 Days

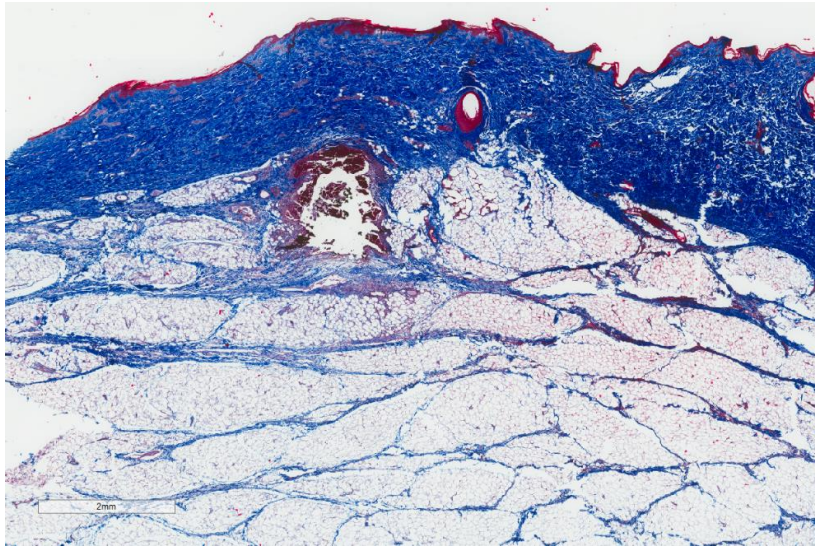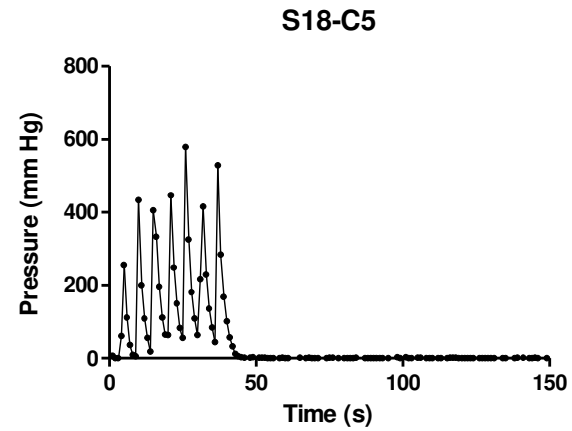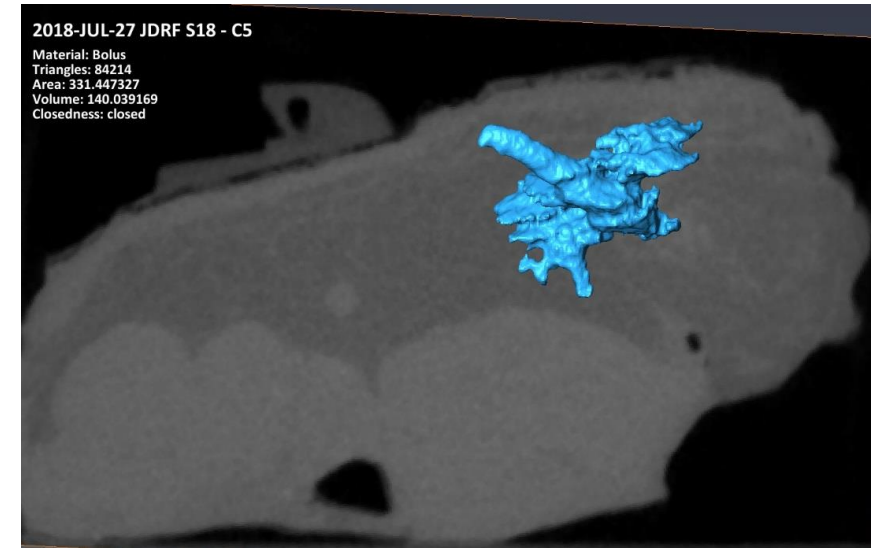



# 30°, Swine S18, 4 Days

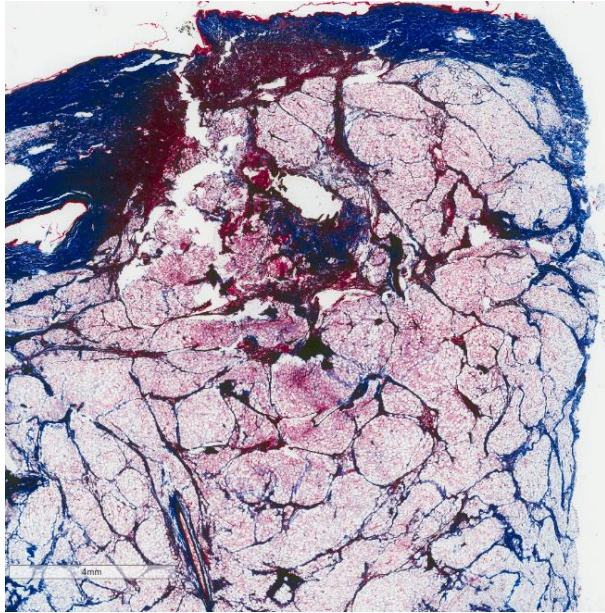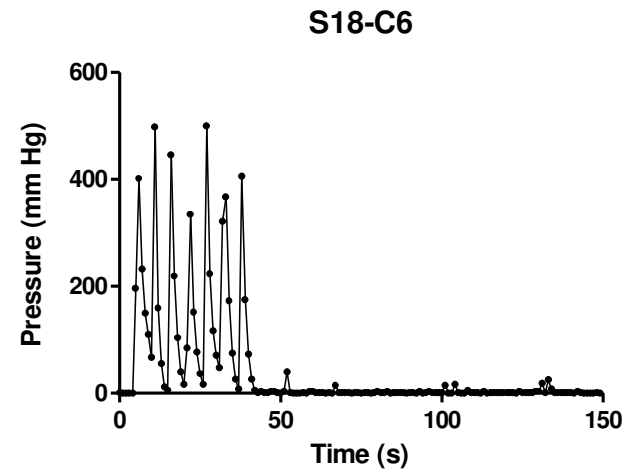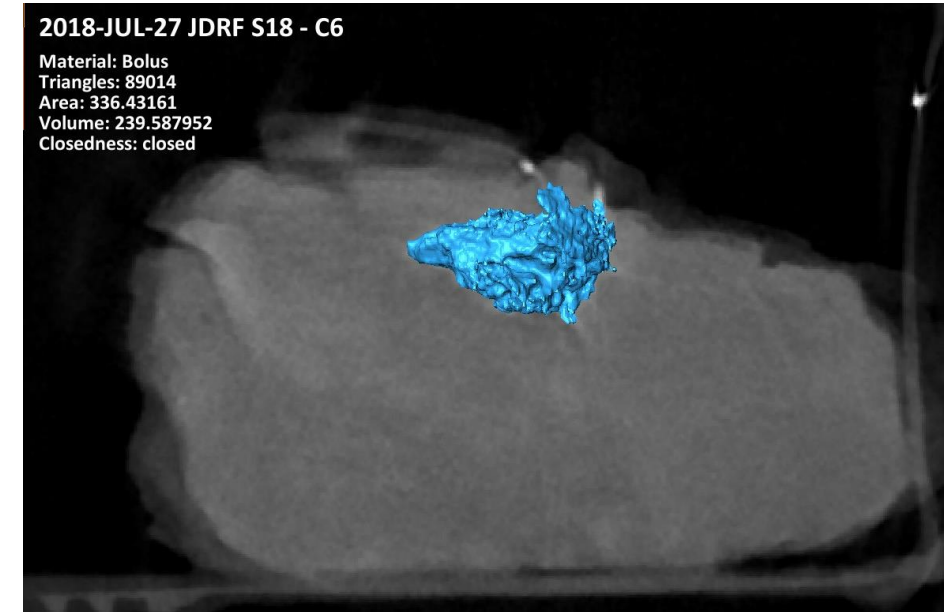

# 30°, Swine S18, 2 Days

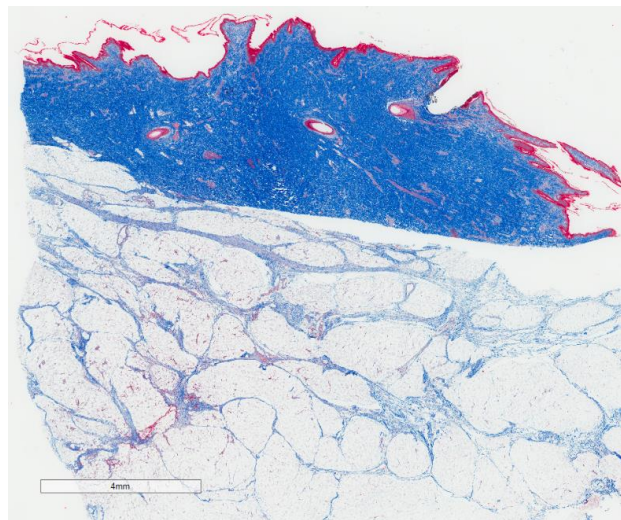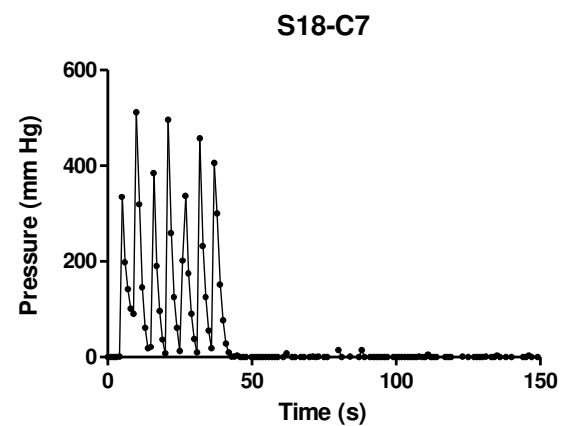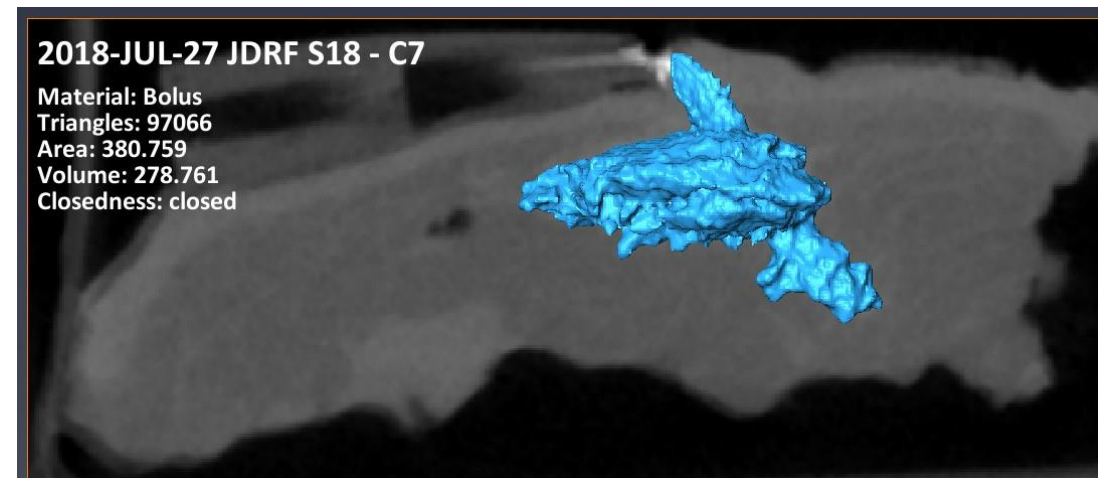

# 30°, Swine S18, Freshly Inserted (Day 1)

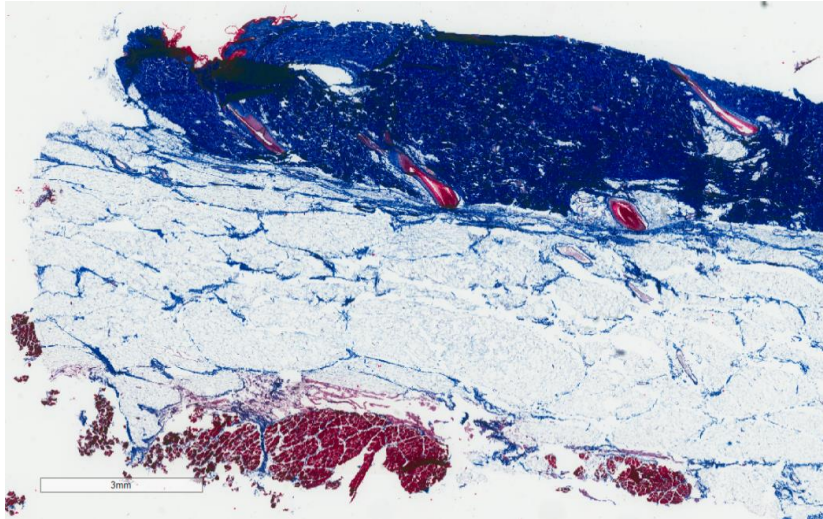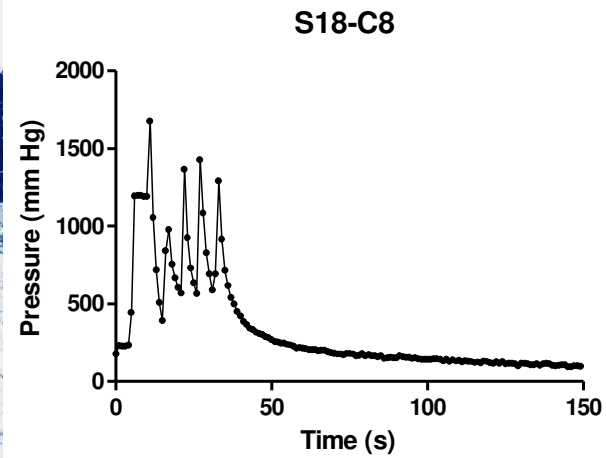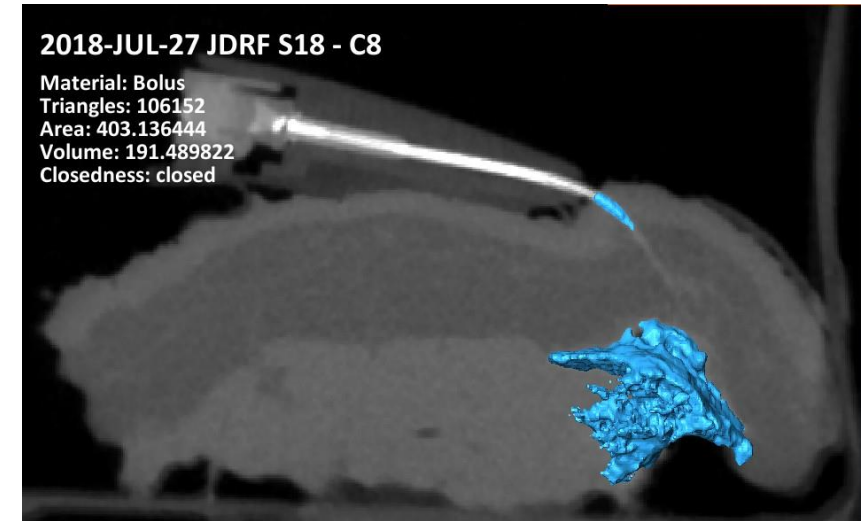

Supplement: bmjdrc-2019-000881supp002.pdf [file bmjdrc-2019-000881supp002.pdf]
