# Supplementary material for: In vivo investigation of the tissue response to commercial Teflon insulin infusion sets in large swine for 14 days: the effect of angle of insertion on tissue histology and insulin spread within the subcutaneous tissue
Source: PubMed Central journal article supplement — BMJ Open Diabetes Res Care. 2019 Dec 8;7(1):e000881. doi: 10.1136/bmjdrc-2019-000881 (PMC6904176; doi:10.1136/bmjdrc-2019-000881), 2019-12-08
Supplement: bmjdrc-2019-000881supp001.pdf [file bmjdrc-2019-000881supp001.pdf]

## Supplementary Material I

Eisler *et al.*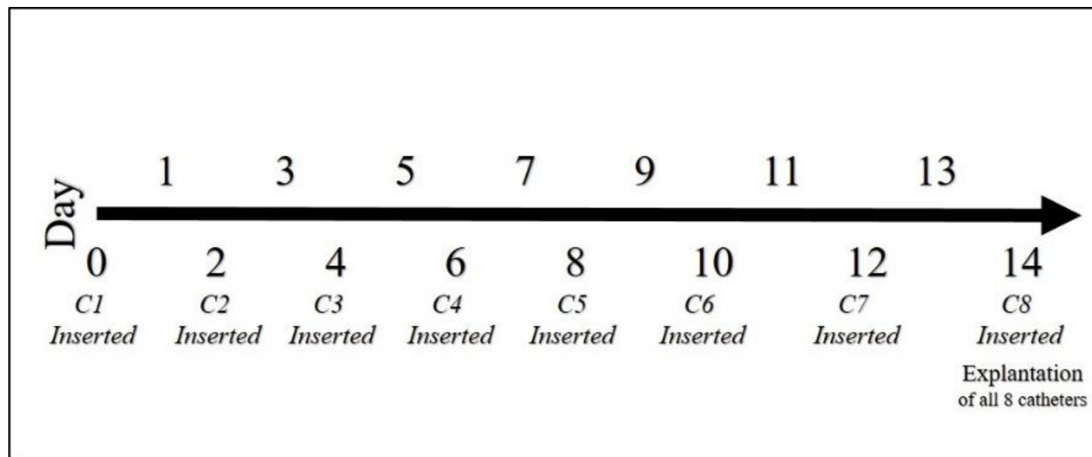

Figure S1: Study Timeline.

Table S1: Study Medications.

| Drug                                         | Type            | Dosage                                               | Route   | Frequency                    | Reason for Administration                                                                                                                    | Pharma Grade? |
|----------------------------------------------|-----------------|------------------------------------------------------|---------|------------------------------|----------------------------------------------------------------------------------------------------------------------------------------------|---------------|
| Buprenorphine                                | Analgesic       | 0.005-0.01 mg/kg                                     | IM      | Every 12 hrs. as needed      | Analgesia                                                                                                                                    | Yes           |
| Telazol                                      | Anesthetic      | 3 to 5 mg/kg (tiletamine+zolazepam 50 mg/mL of each) | IM      | Once every 2 days for 7 days | Sedation                                                                                                                                     | Yes           |
| Isoflourane                                  | Anesthetic      | 0.1 – 3.0%                                           | Inhaled | Continuous during GA         | Anesthetic induction/maintenance                                                                                                             | Yes           |
| Atropine                                     | Anticholinergic | 0.02-0.1 mg/kg                                       | IM      | Prior to induction           | Prevention of anesthesia induced bradycardia                                                                                                 | Yes           |
| Insulin                                      | Other           | U-10 Lispro Insulin (10 units/mL)                    | SQ      | Continuous infusion          | Infused through CSII catheter to affect immune response to catheter insertion                                                                | Yes           |
| Saline/Fluids (NaCl, LR, Dextrose Solutions) | Maintenance     | Titrated for fluid maintenance and homeostasis       | IV      | Continuous infusion during   | 20% Dextrose to prevent hypoglycemia and blood glucose maintenance. Saline used to maintain intravascular volume during surgical procedures. | Yes           |
| Glucagon                                     | Other           | 1 mg: repeat PRN                                     | IM      | As needed                    | Rescue for hypoglycemia                                                                                                                      | Yes           |
| Beuthanasia/Euthasol                         | Other           | 1 mL/10 lbs body weight. Higher dose as needed       | IV      | Once at time of euthanasia   | Euthanasia                                                                                                                                   | Yes           |

## Supplementary Material I

Eisler *et al.*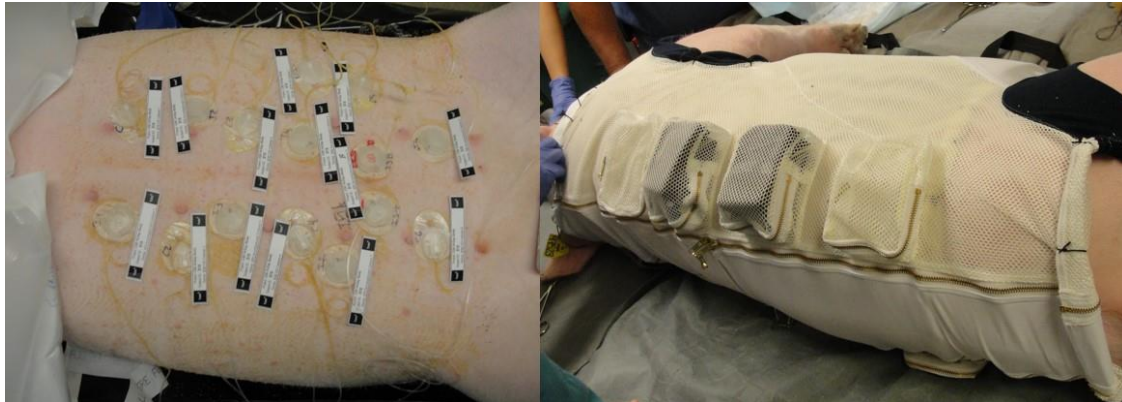

**Figure S2:** Commercial CSII catheters inserted in the swine abdomen (left). Battery powered insulin pumps are protected in pockets of a swine vest (right).

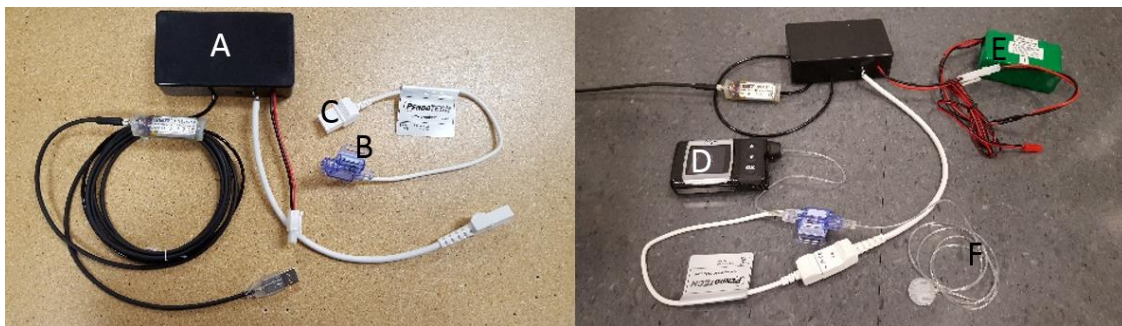

**Figure S3.** Setup for pressure measurement in CSII tubing. A: data logger; B: pressure sensor connected to tubing; C: connector for data logger; D: insulin pump; E: battery; F: CSII tubing

## Supplementary Material I

Eisler *et al.*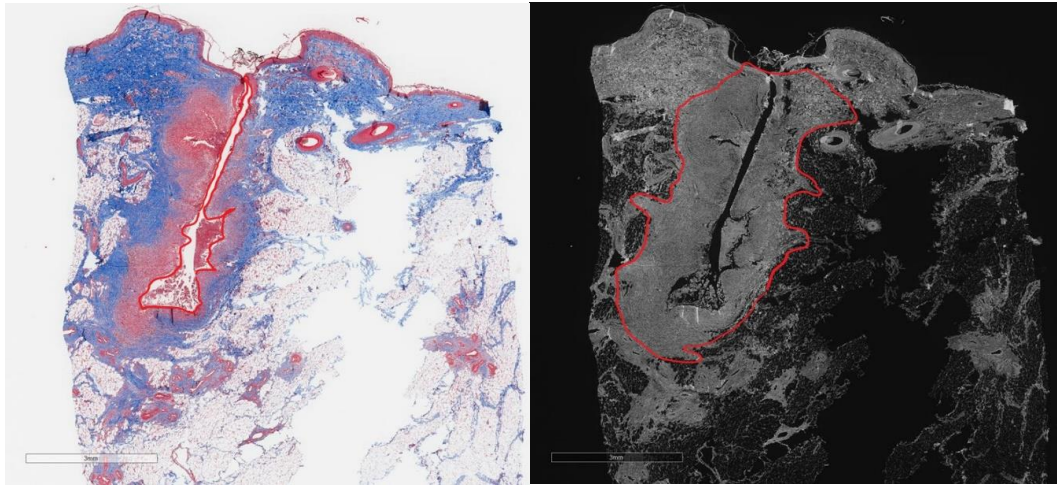

**Figure S4:** Histology analysis of the area of inflammation using ImageJ.

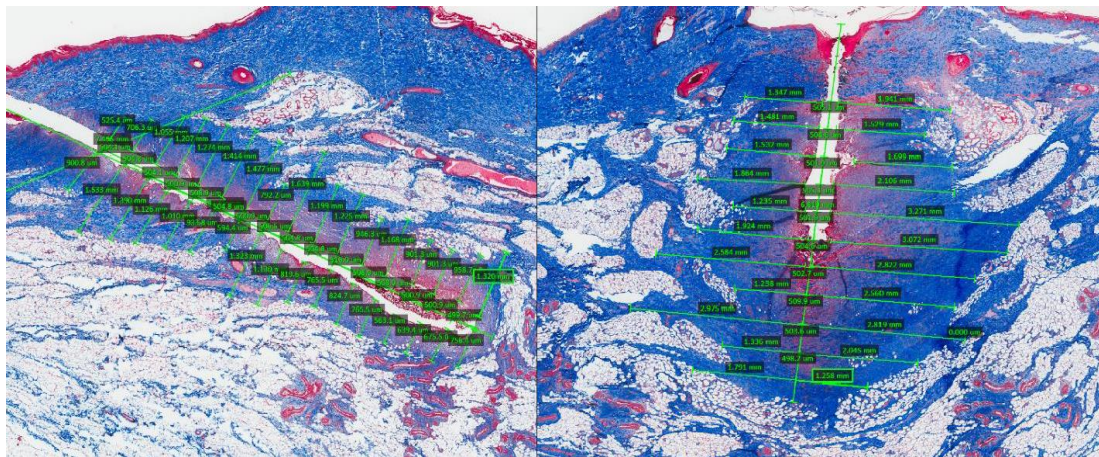

**Figure S5:** Example of measurement of the thickness of the layer of inflammation. Due to variability in the total channel length visible for each catheter, the thickness measurement was standardized to 4 points (Upper Left and Right, and Lower Left and Right). This created a standard measurement for each histology image (n=4).

## Supplementary Material I

Eisler *et al.***Table S2:** Number of samples included in the micro-CT analysis

| Day   | 30<br>Degree<br>Insertion | 90<br>Degree<br>Insertion |
|-------|---------------------------|---------------------------|
| 0     | 6                         | 4                         |
| 2     | 6                         | 4                         |
| 4     | 5                         | 3                         |
| 6     | 6                         | 4                         |
| 8     | 5                         | 4                         |
| 10    | 6                         | 4                         |
| 12    | 6                         | 4                         |
| 14    | 6                         | 3                         |
| Total | 46                        | 30                        |

**Table S3:** Number of samples included in the “*Area of Inflammation*” analysis.

| Day   | 30<br>Degree<br>Insertion | 90<br>Degree<br>Insertion |
|-------|---------------------------|---------------------------|
| 0     | 1                         | 5                         |
| 2     | 2                         | 5                         |
| 4     | 2                         | 5                         |
| 6     | 4                         | 4                         |
| 8     | 4                         | 5                         |
| 10    | 4                         | 5                         |
| 12    | 6                         | 5                         |
| 14    | 5                         | 4                         |
| Total | 28                        | 38                        |

**Table S4:** Number of samples included in the “*Layer of Inflammation*” analysis.

| Day   | 35<br>Degree<br>Insertion | 90<br>Degree<br>Insertion |
|-------|---------------------------|---------------------------|
| 0     | 8                         | 20                        |
| 2     | 8                         | 20                        |
| 4     | 8                         | 20                        |
| 6     | 16                        | 20                        |
| 8     | 20                        | 16                        |
| 10    | 16                        | 20                        |
| 12    | 24                        | 20                        |
| 14    | 20                        | 16                        |
| Total | 120                       | 152                       |
